# Supplementary material for: Communicative Efficiency or Iconic Learning: Do Acquisition and Communicative Pressures Interact to Shape Colour- Naming Systems?
Source: MDPI journal article supplement (doi:10.3390/e24111542), 2022-10-26
Supplement: s1 [file s1]

# Supplementary Materials: Communicative Efficiency or Iconic Learning: Do Acquisition and Communicative Pressures Interact to Shape Colour-Naming Systems?

Balint Gyevnar <sup>1,†,\*</sup> , Gautier Dagan <sup>1,†</sup> , Coleman Haley <sup>1,†</sup> , Shangmin Guo <sup>1,†</sup>  and Frank Mollica <sup>1</sup> 

The purpose of this Supplemental Material is to enumerate our results across all attested languages in the World Colour Survey [1].

## 1. Results for All Languages

We here present our results for every attested language in the World Colour Survey. Each subsection corresponds to a language in the WCS, and for each language we plot the following figures:

- The learning trajectory for the attested language and the learning trajectory for the most sub-optimal permuted variant.
- The learning trajectory mapped onto the communicative efficiency space.
- Mode maps for the adult-like colour naming system, the learnt colour naming system, and the *learnt* sub-optimal colour naming system.
- The colour topology of the learnt SOM model's cells with the corresponding most frequent colour term in each cell.
- The evolution of colour naming accuracy for the attested language and the most sub-optimal permuted variant.

### 1.1. Abidji; $|\mathcal{W}| = 9$

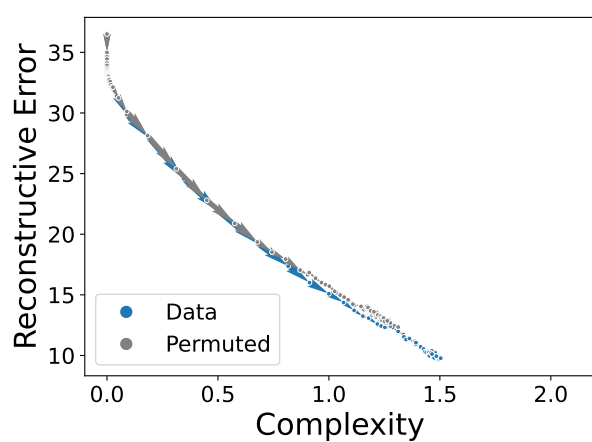

(a) Learning Space

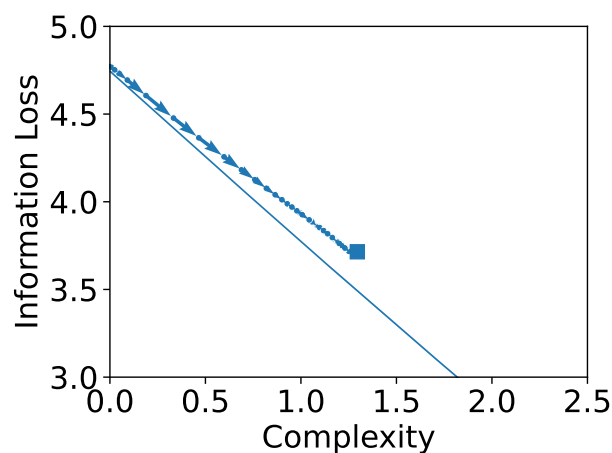

(b) Communicative Space

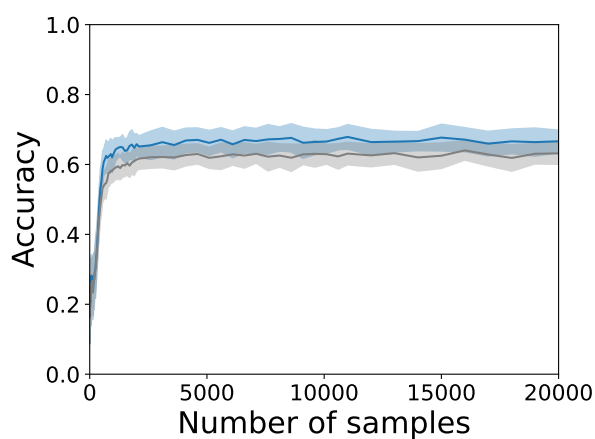

(c) Accuracy

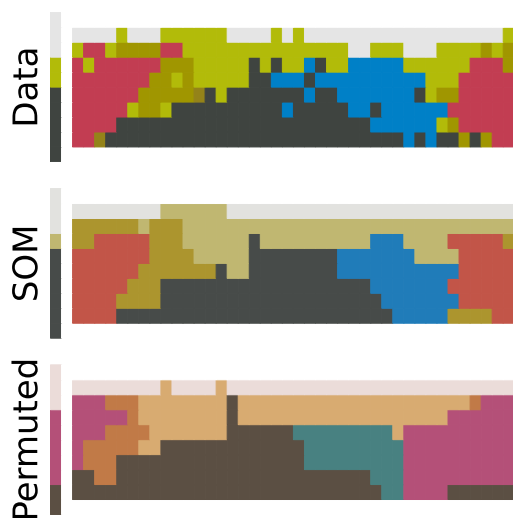

(d) Mode Maps

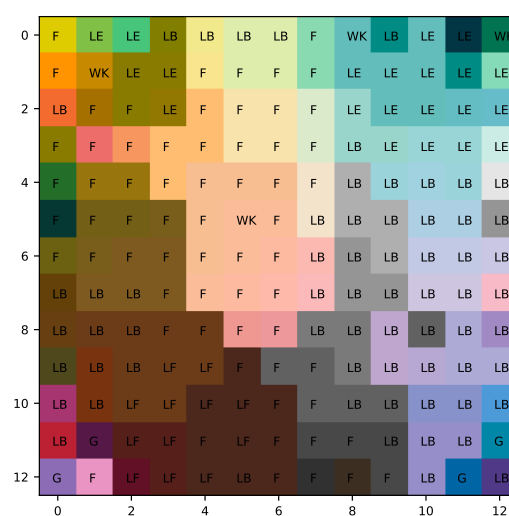

(e) Learnt SOM Cells

### 1.2. Agarabi; $|\mathcal{W}| = 28$

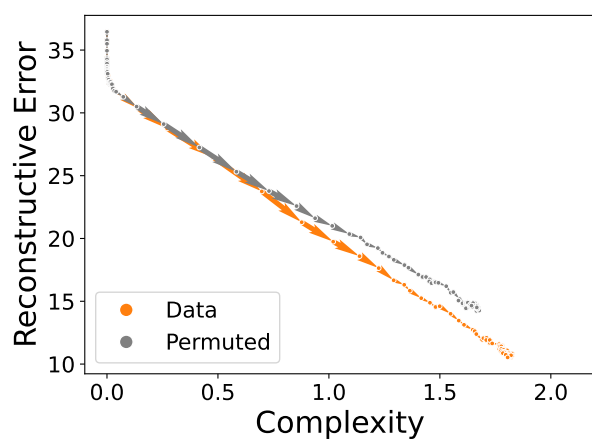

(a) Learning Space

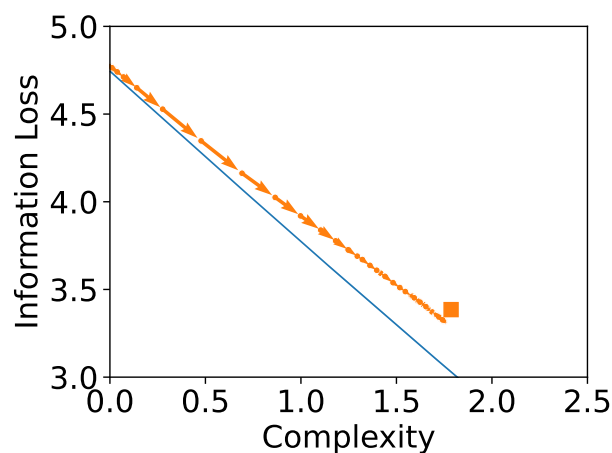

(b) Communicative Space

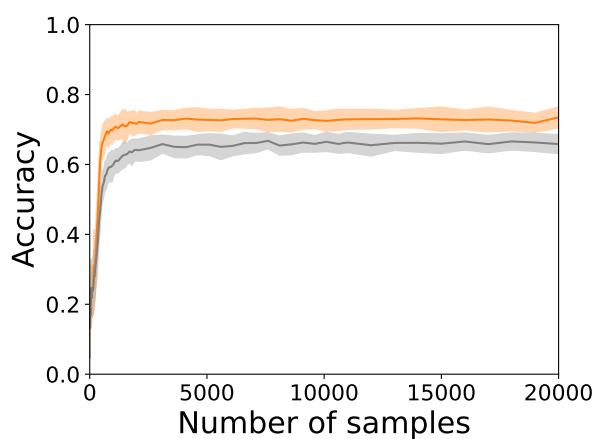

(c) Accuracy

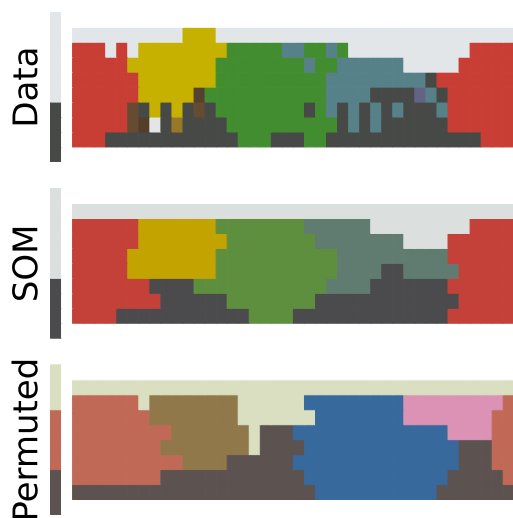

(d) Mode Maps

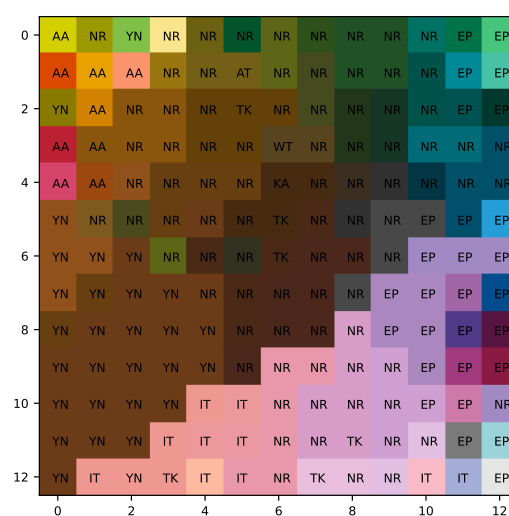

(e) Learnt SOM Cells

### 1.3. Casiguran Agta; $|\mathcal{W}| = 71$

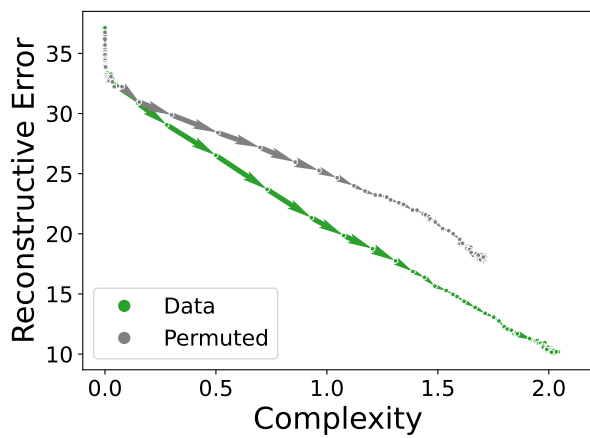

(a) Learning Space

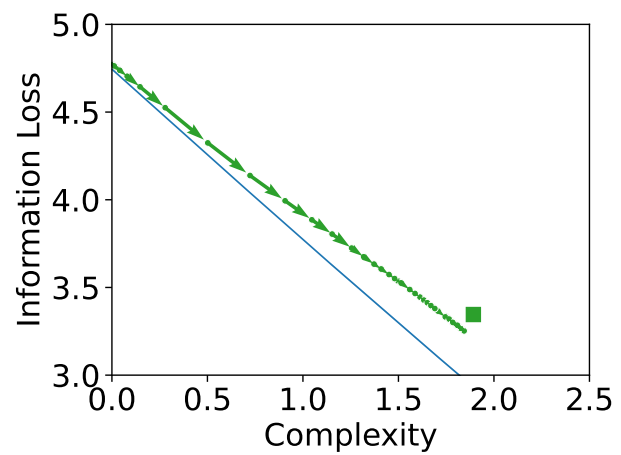

### (b) Communicative Space

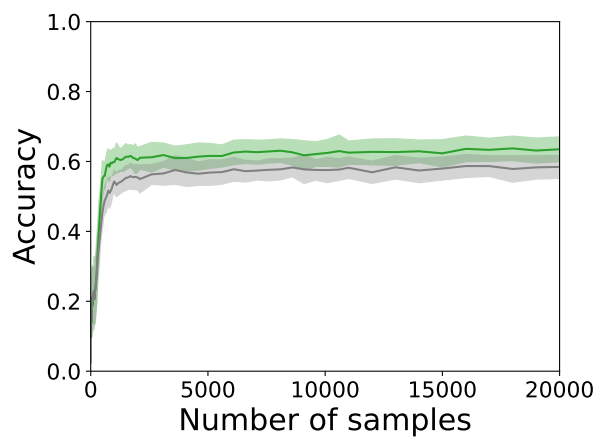

### (c) Accuracy

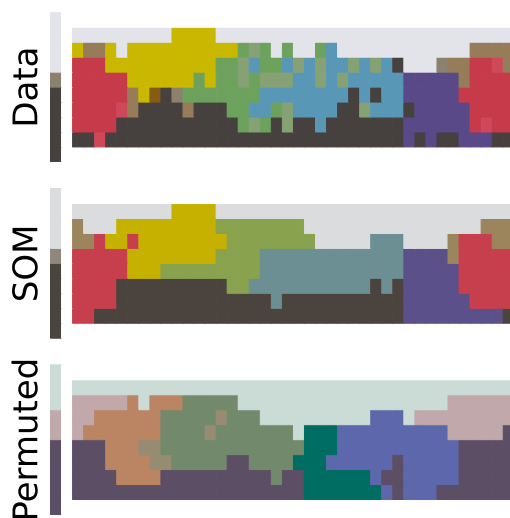

(d) Mode Maps

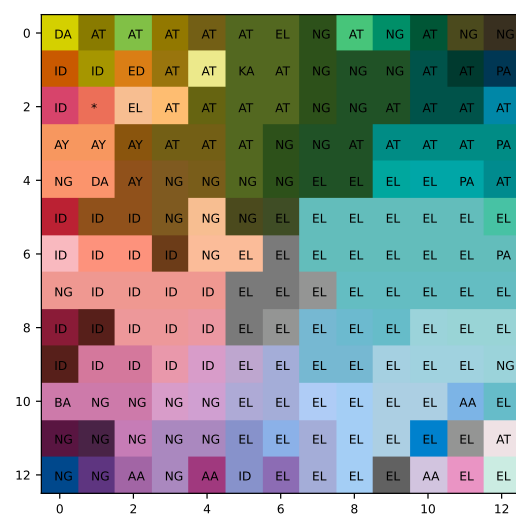

(e) Learnt SOM Cells



#### 1.4. Aguacateco; $|\mathcal{W}| = 25$

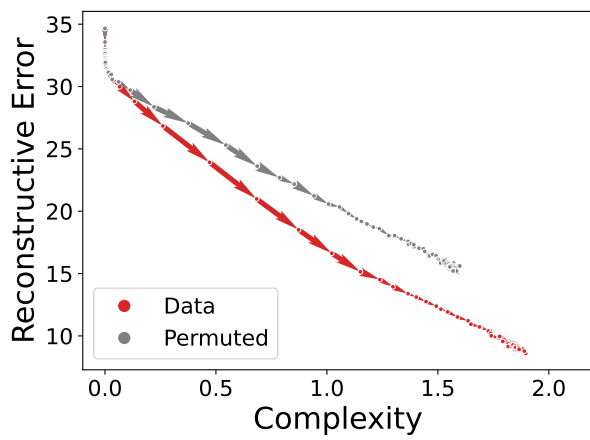

(a) Learning Space

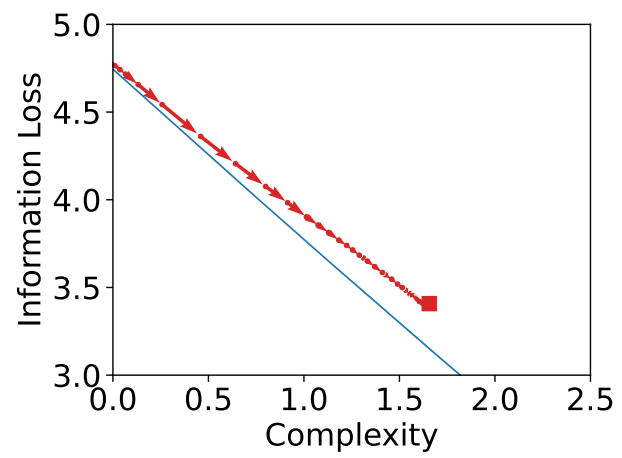

(b) Communicative Space

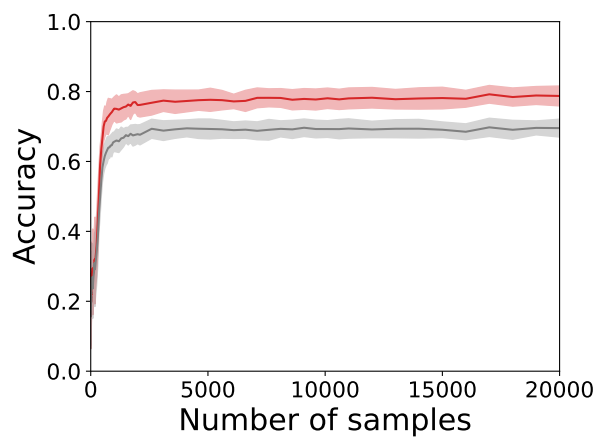

(c) Accuracy

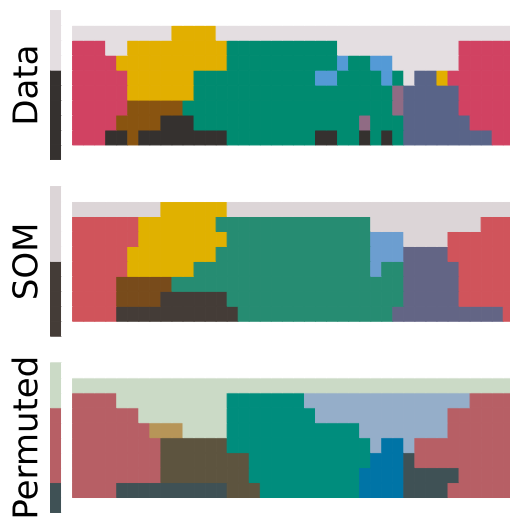

(d) Mode Maps

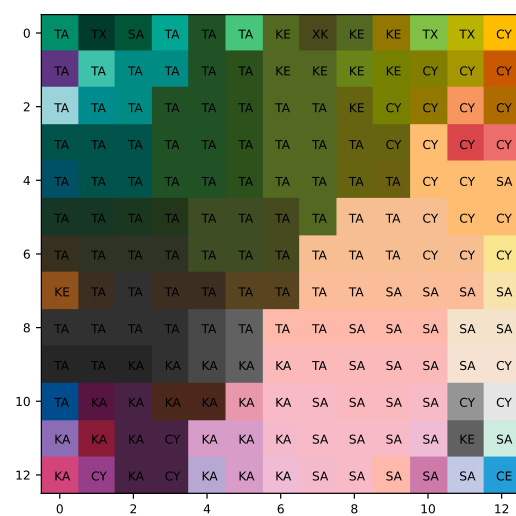

(e) Learnt SOM Cells

### 1.5. Amarakaeri; $|\mathcal{W}| = 9$

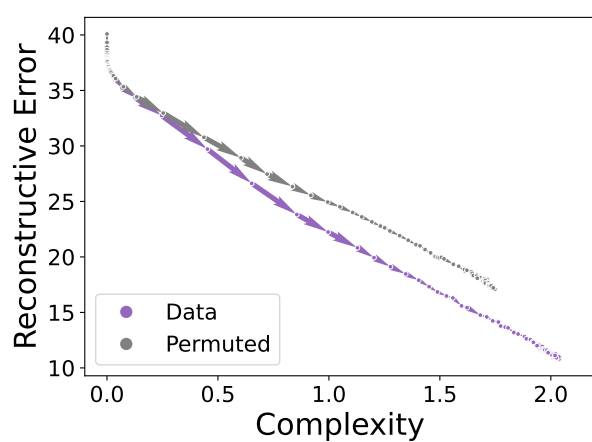

(a) Learning Space

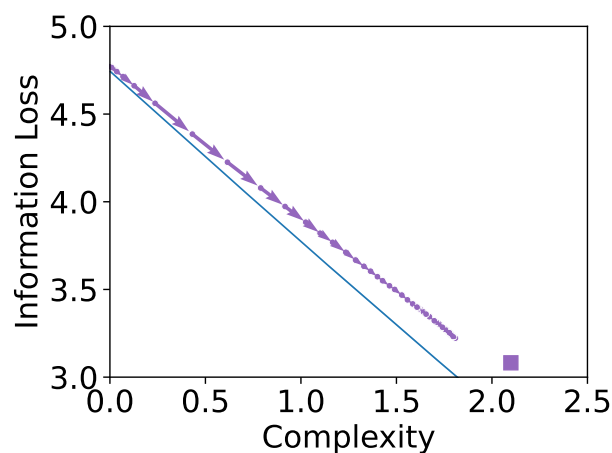

(b) Communicative Space

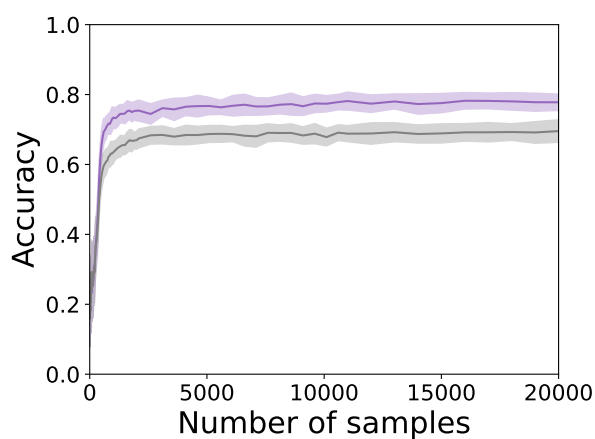

(c) Accuracy

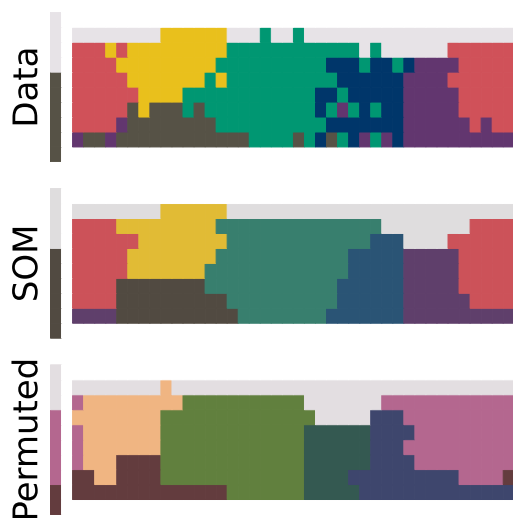

(d) Mode Maps

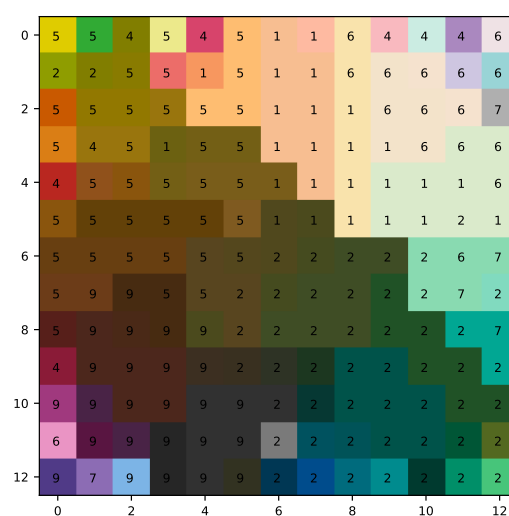

(e) Learnt SOM Cells

### 1.6. Ampeeli; $|\mathcal{W}| = 42$

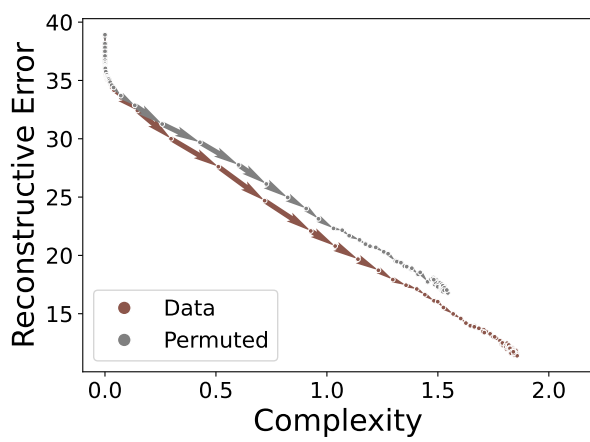

(a) Learning Space

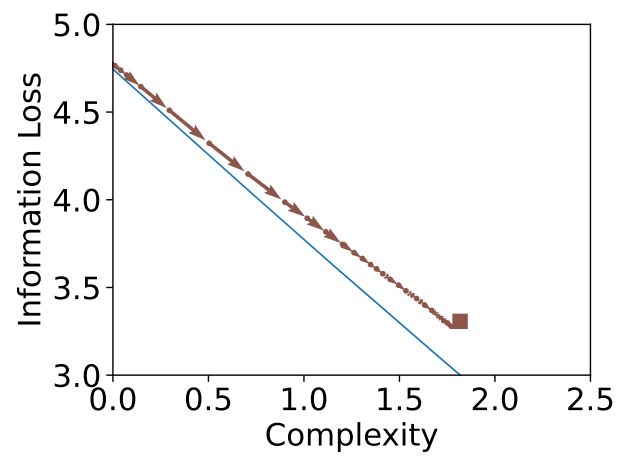

(b) Communicative Space

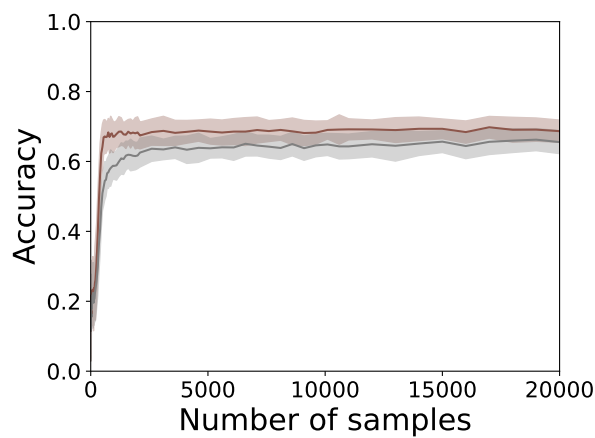

(c) Accuracy

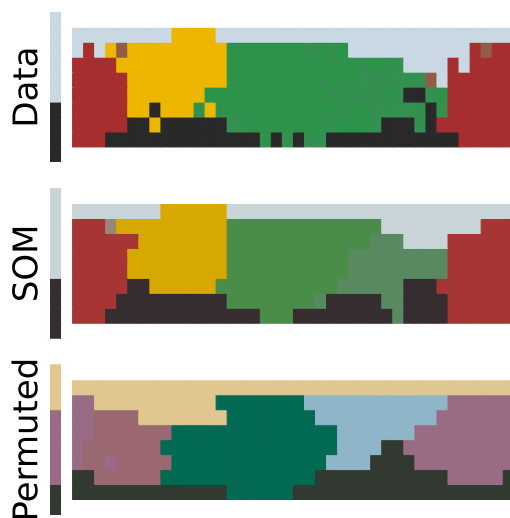

(d) Mode Maps

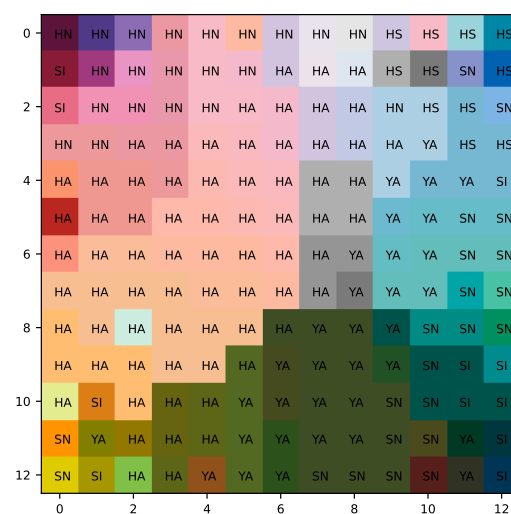

(e) Learnt SOM Cells

### 1.7. Amuzgo; $|\mathcal{W}| = 21$

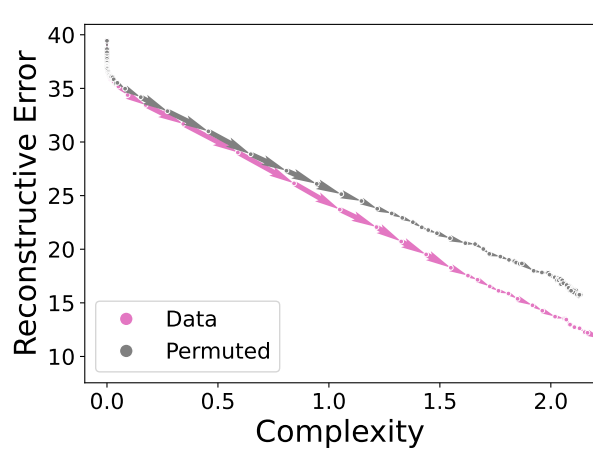

(a) Learning Space

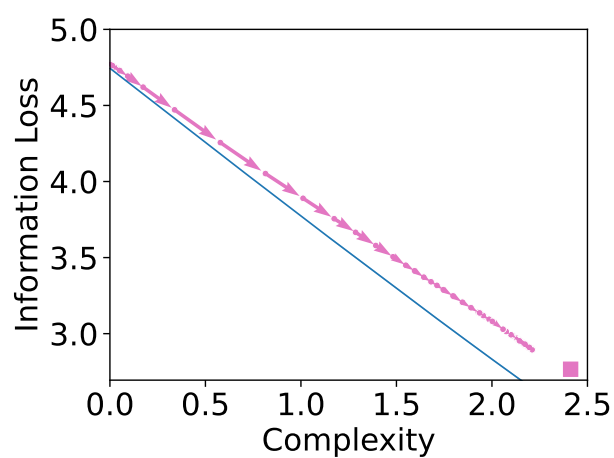

(b) Communicative Space

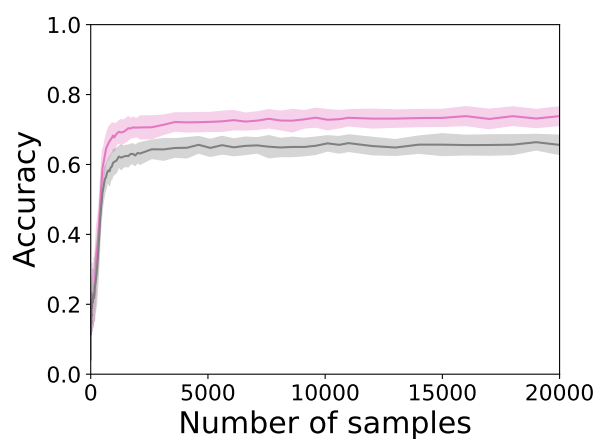

(c) Accuracy

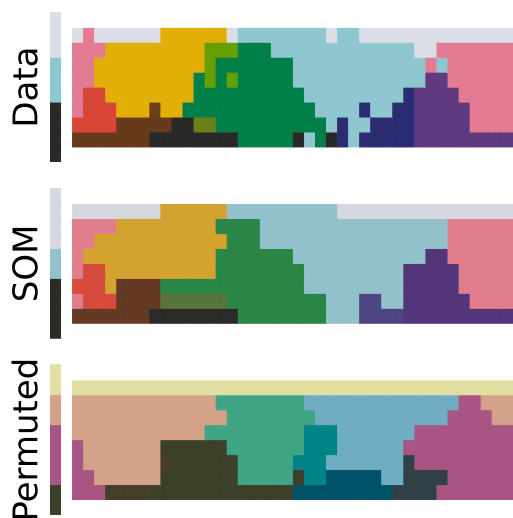

(d) Mode Maps

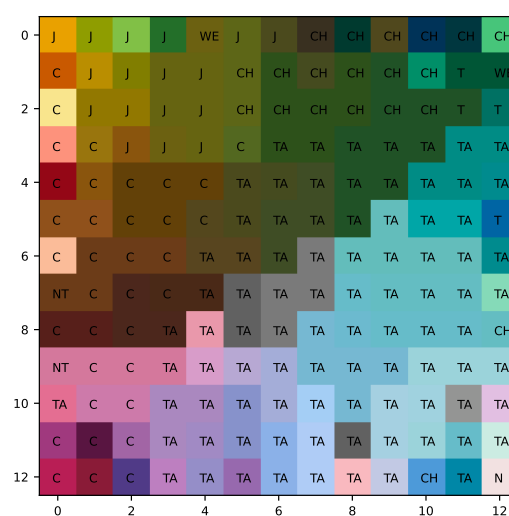

(e) Learnt SOM Cells

### 1.8. Angaatiha; $|\mathcal{W}| = 16$

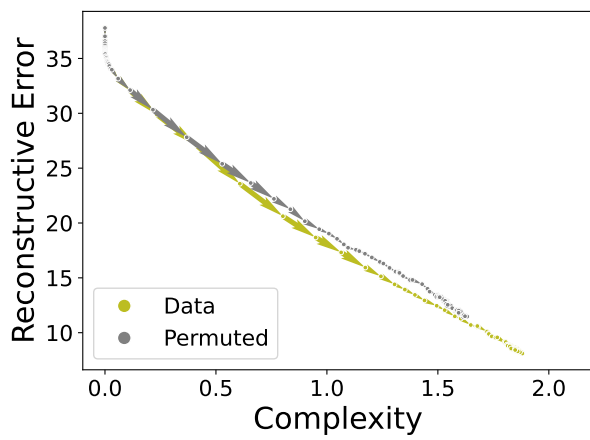

(a) Learning Space

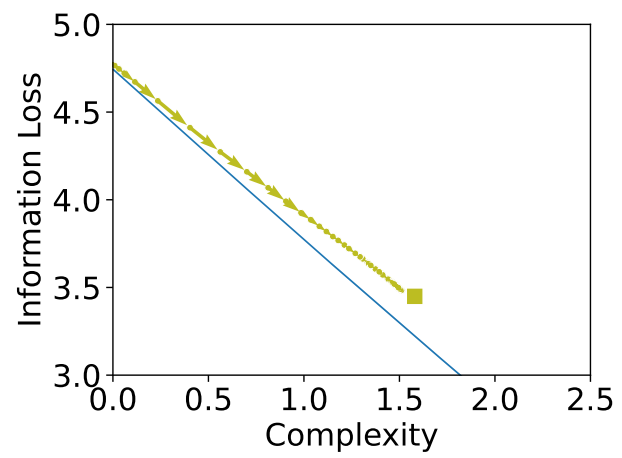

(b) Communicative Space

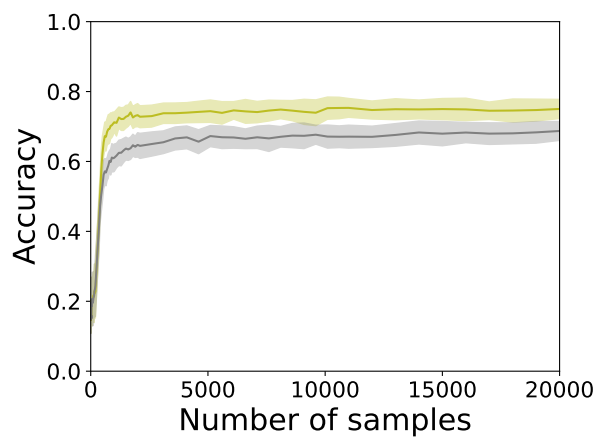

(c) Accuracy

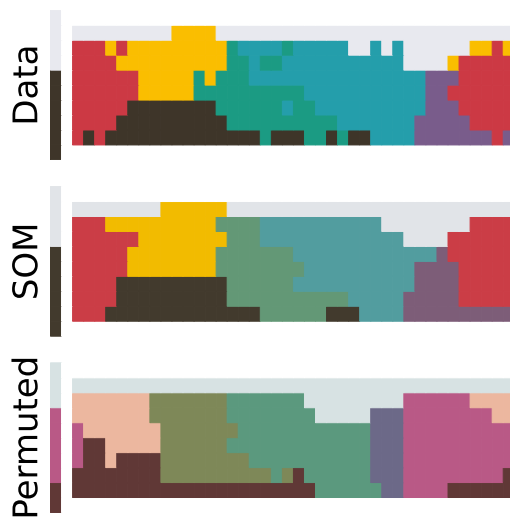

(d) Mode Maps

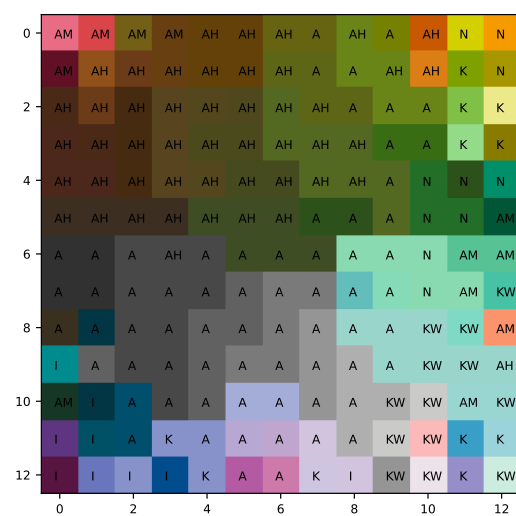

(e) Learnt SOM Cells

### 1.9. Apinaye; $|\mathcal{W}| = 13$

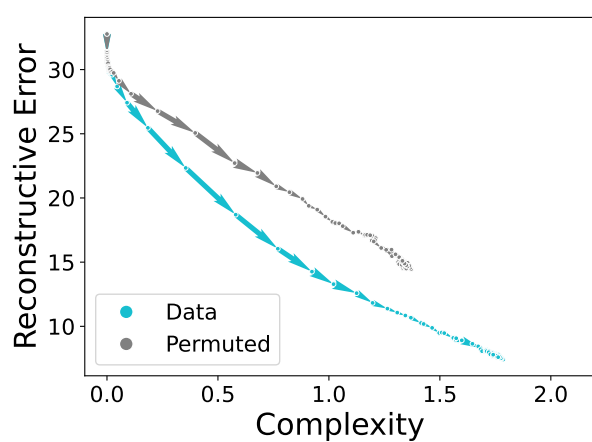

(a) Learning Space

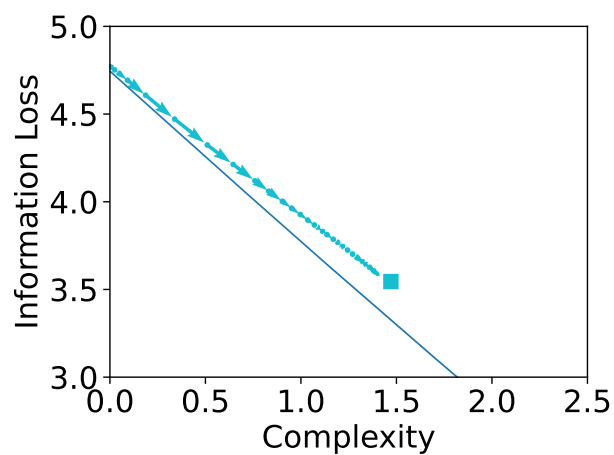

(b) Communicative Space

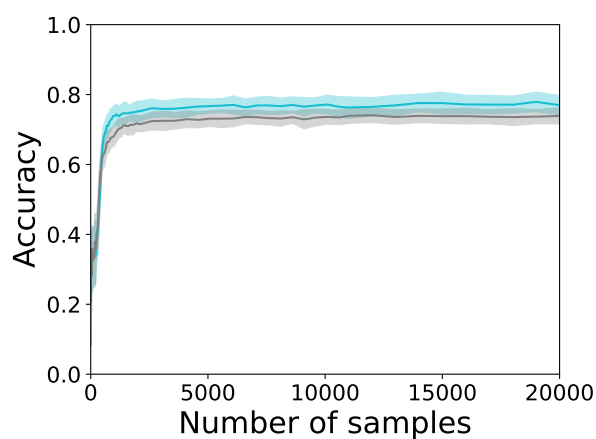

(c) Accuracy

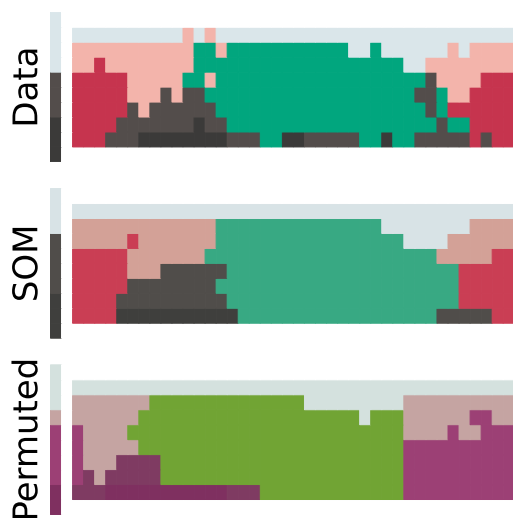

(d) Mode Maps

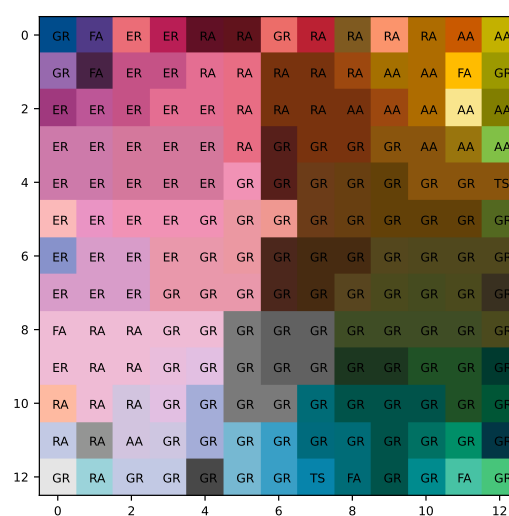

(e) Learnt SOM Cells

1.10. Arabela;  $|\mathcal{W}| = 18$

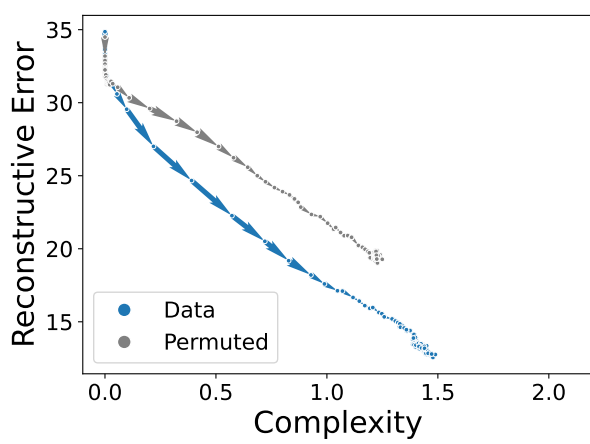

(a) Learning Space

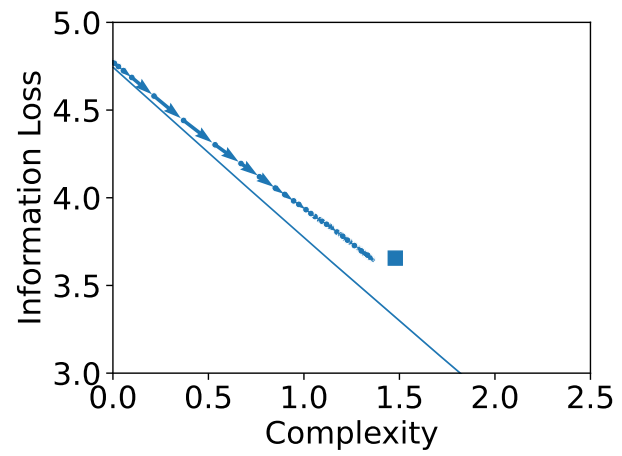

(b) Communicative Space

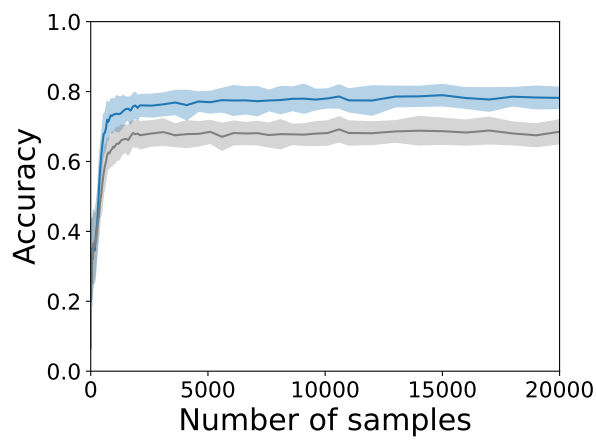

(c) Accuracy

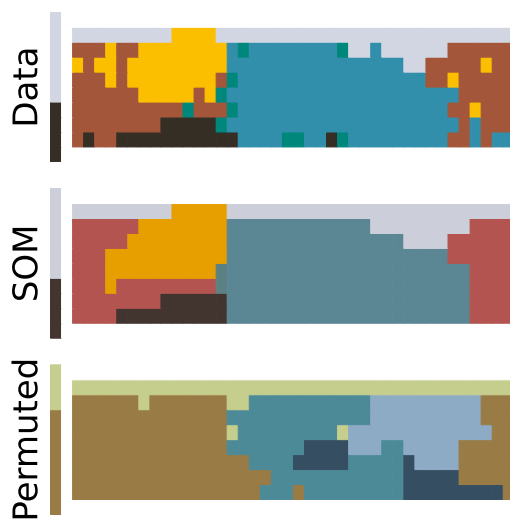

(d) Mode Maps

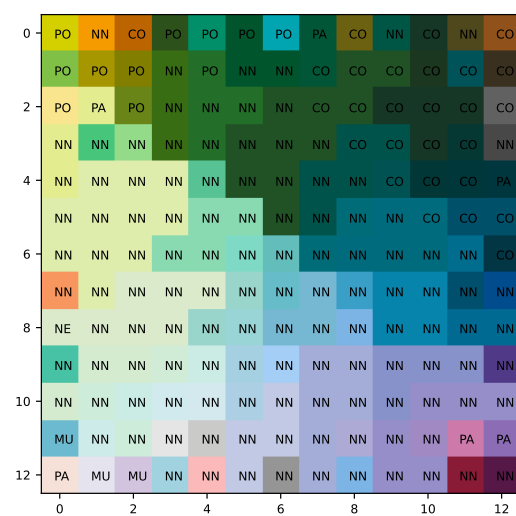

(e) Learnt SOM Cells

1.11. Bahinemo;  $|\mathcal{W}| = 11$

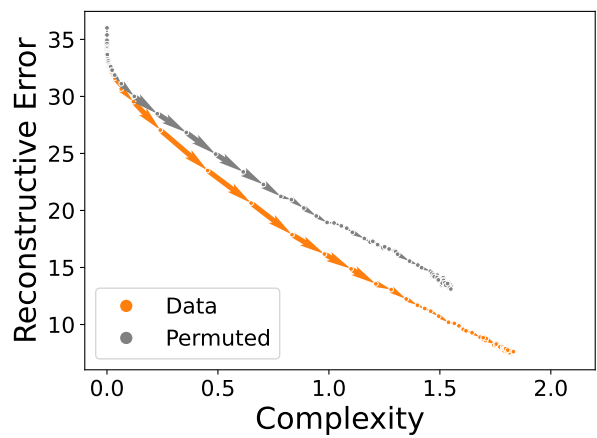

(a) Learning Space

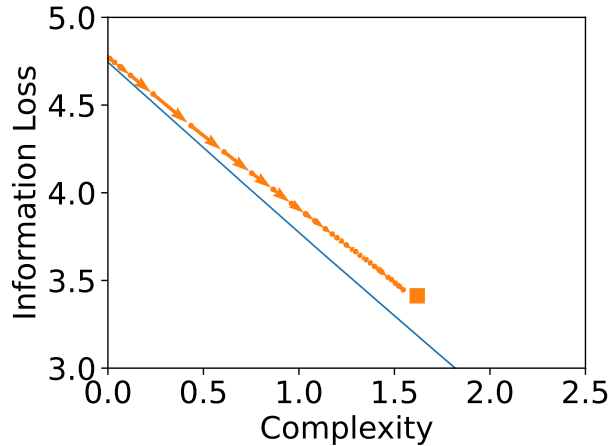

(b) Communicative Space

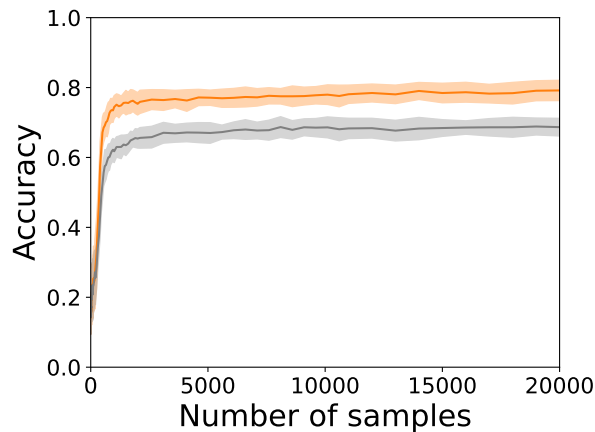

(c) Accuracy

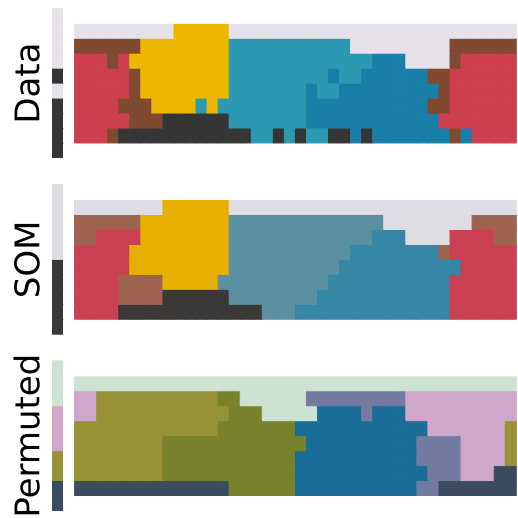

(d) Mode Maps

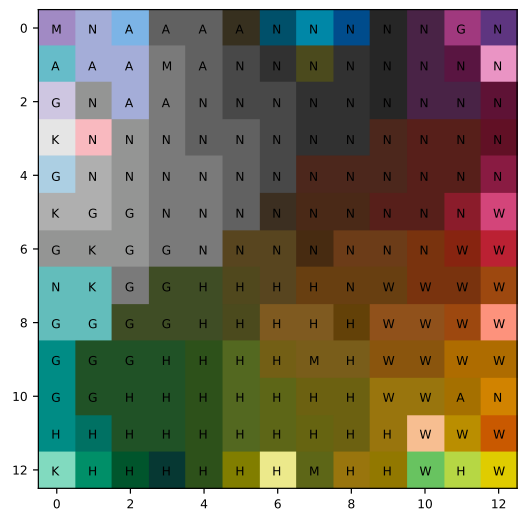

(e) Learnt SOM Cells



### 1.12. Bauzi; $|\mathcal{W}| = 7$

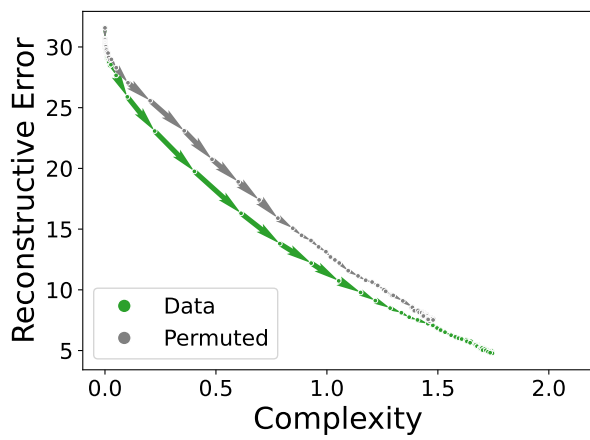

(a) Learning Space

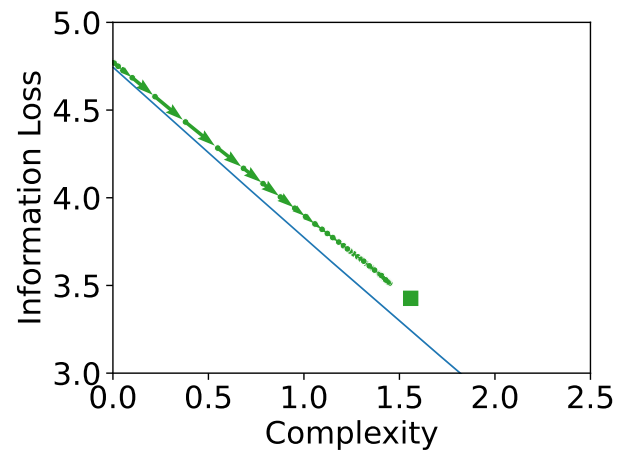

(b) Communicative Space

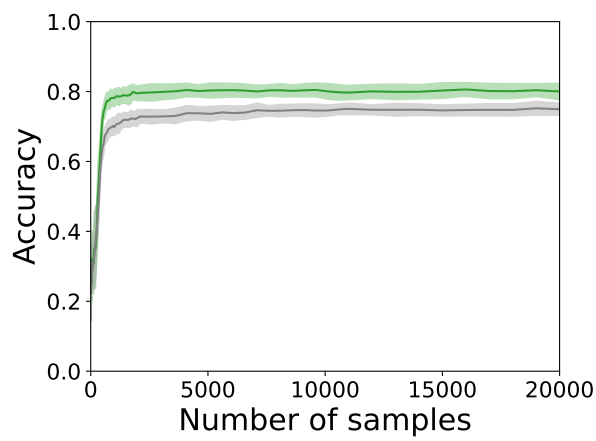

(c) Accuracy

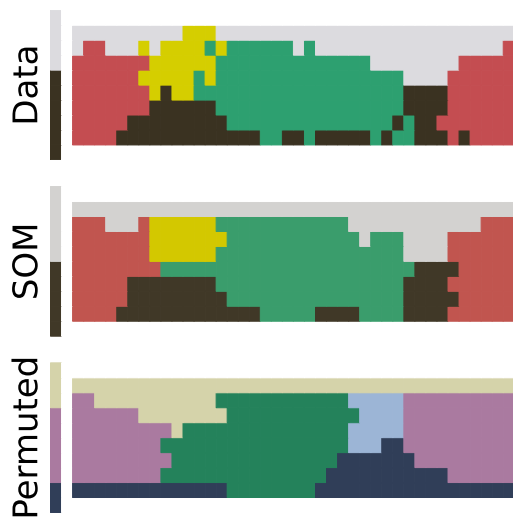

(d) Mode Maps

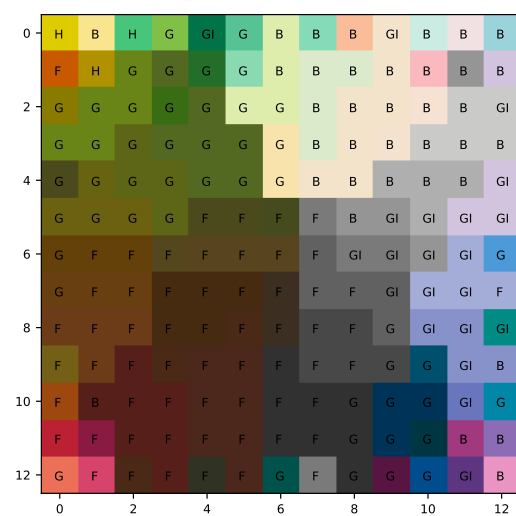

(e) Learnt SOM Cells

### 1.13. Berik; $|\mathcal{W}| = 30$

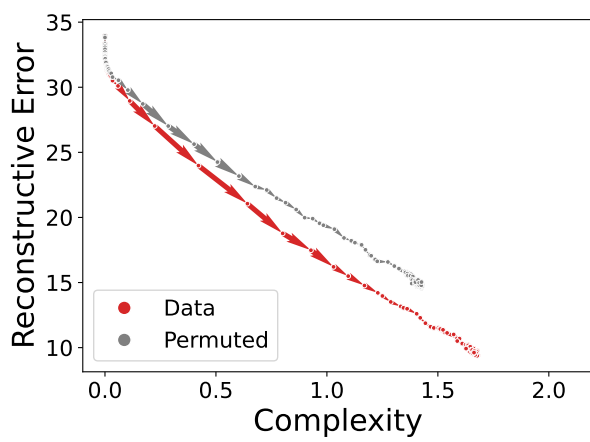

(a) Learning Space

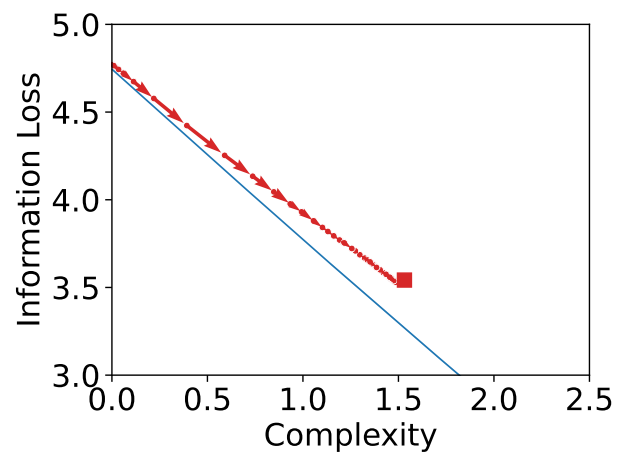

(b) Communicative Space

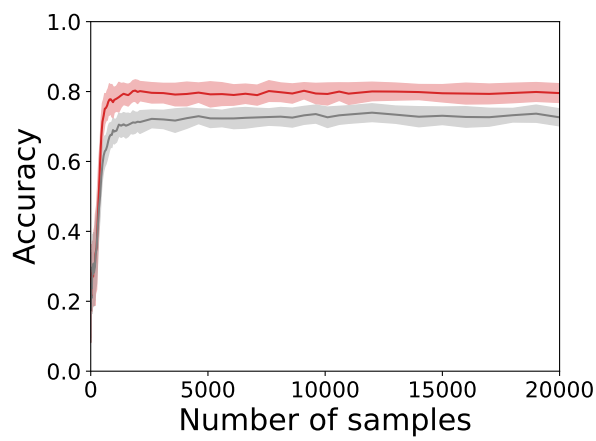

(c) Accuracy

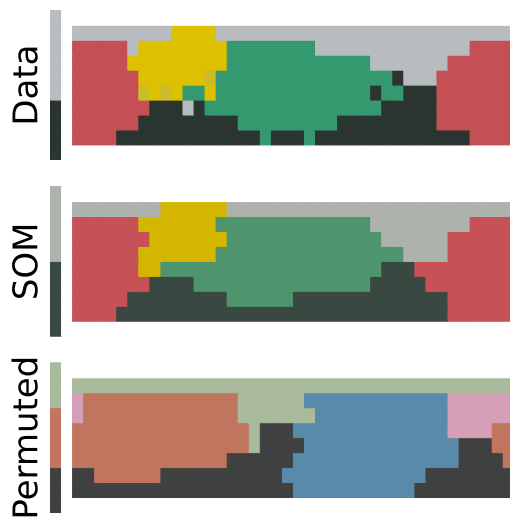

(d) Mode Maps

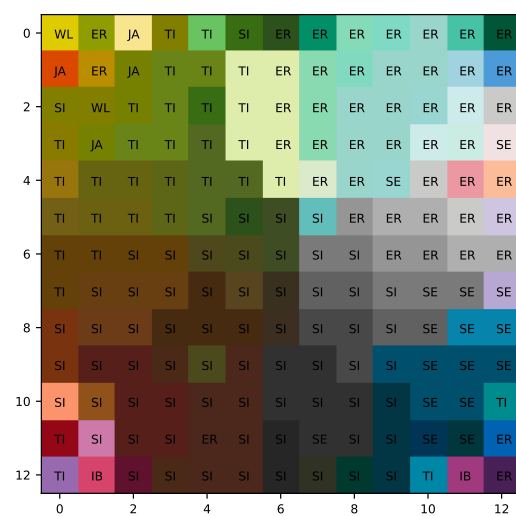

(e) Learnt SOM Cells

1.14. Bete;  $|\mathcal{W}| = 23$

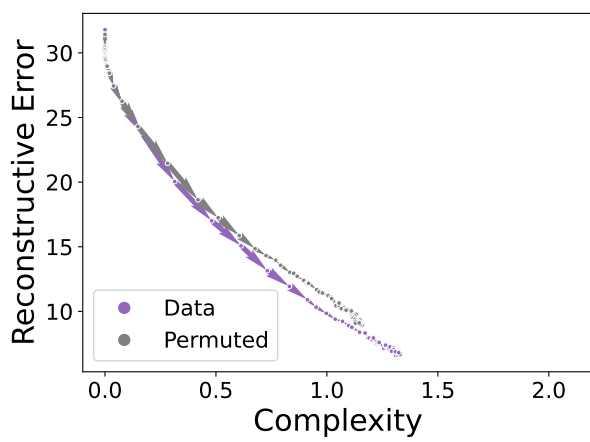

(a) Learning Space

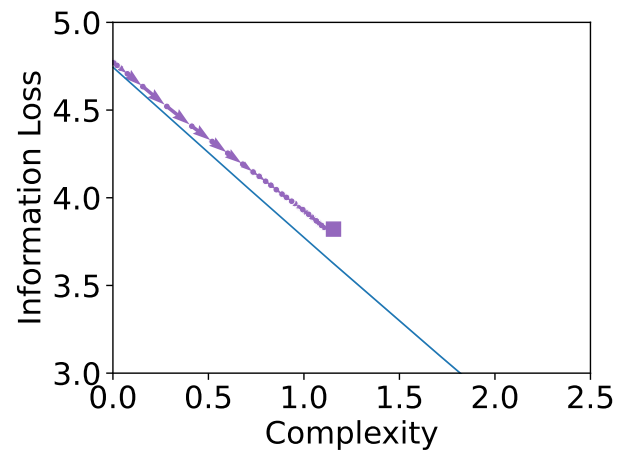

(b) Communicative Space

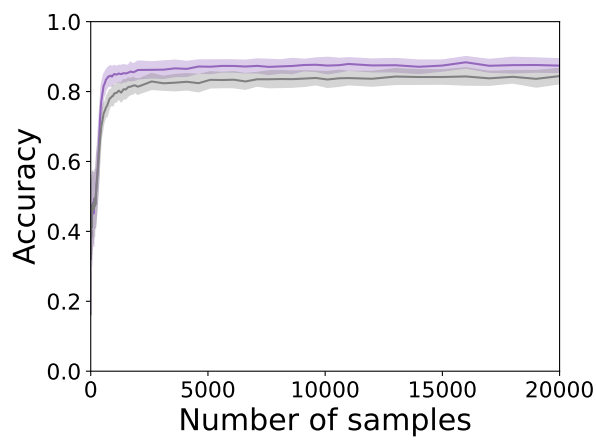

(c) Accuracy

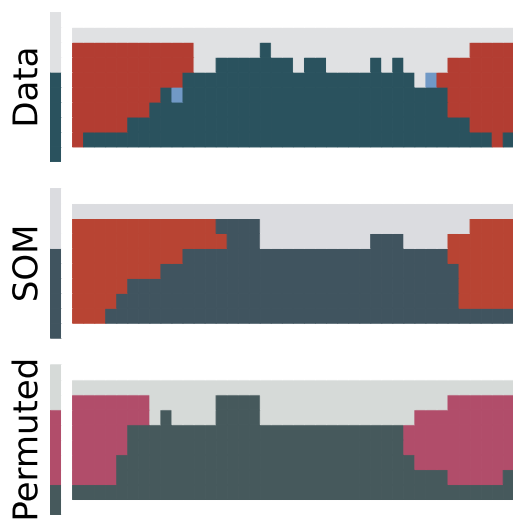

(d) Mode Maps

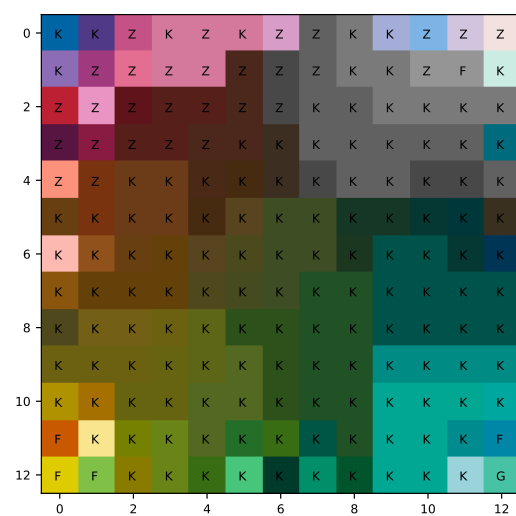

(e) Learnt SOM Cells

1.15. Bhili;  $|\mathcal{W}| = 15$

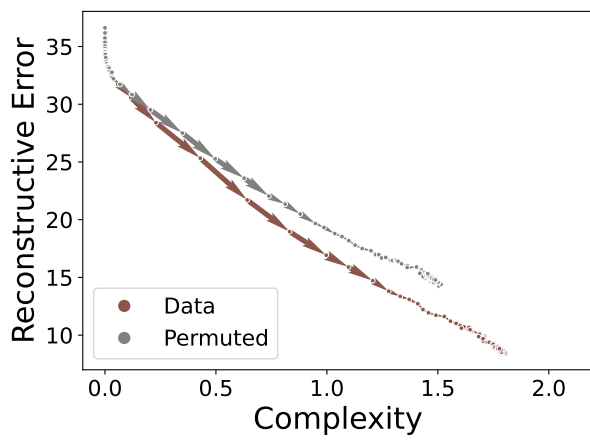

(a) Learning Space

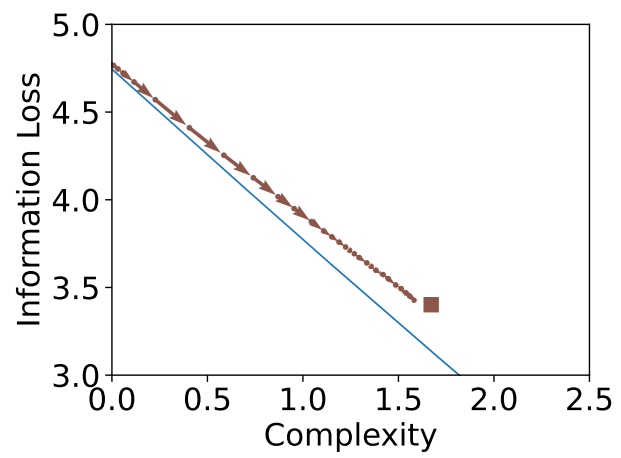

(b) Communicative Space

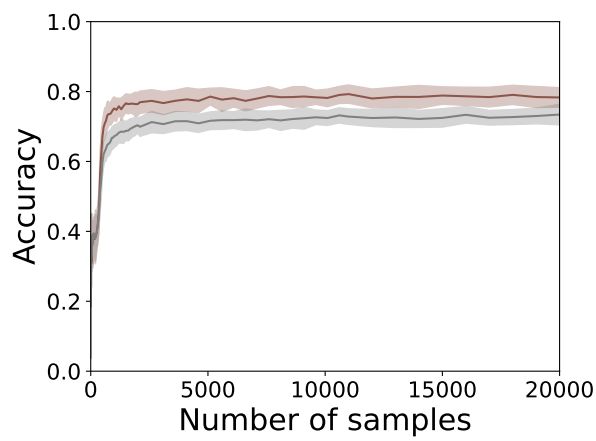

(c) Accuracy

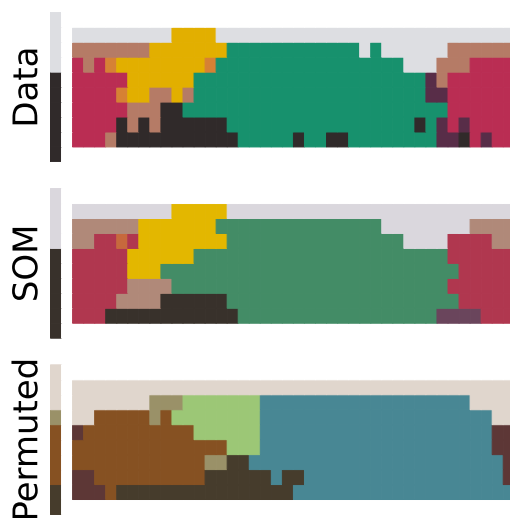

(d) Mode Maps

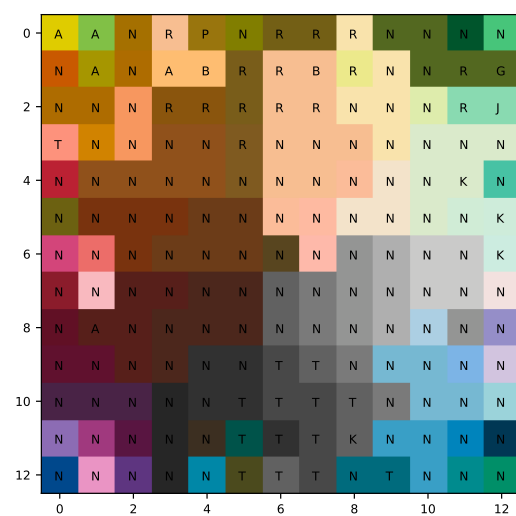

(e) Learnt SOM Cells

### 1.16. Buglere; $|\mathcal{W}| = 14$

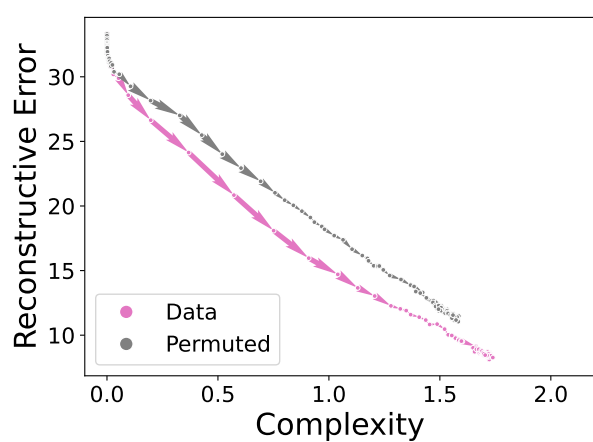

(a) Learning Space

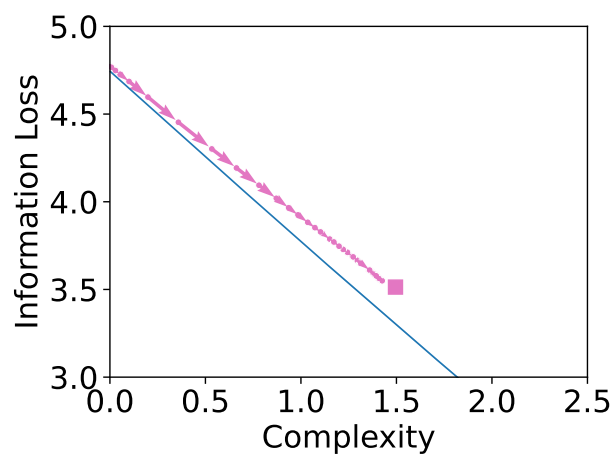

(b) Communicative Space

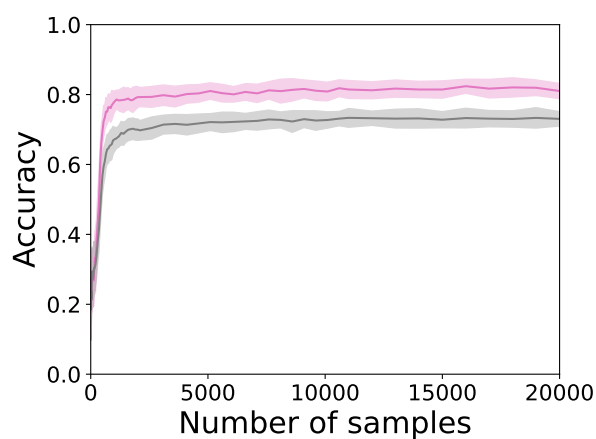

(c) Accuracy

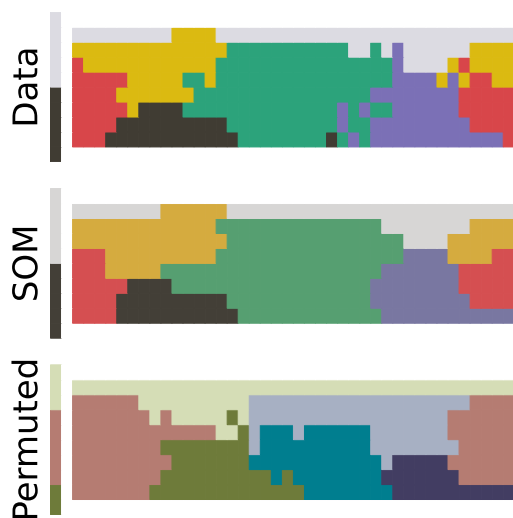

(d) Mode Maps

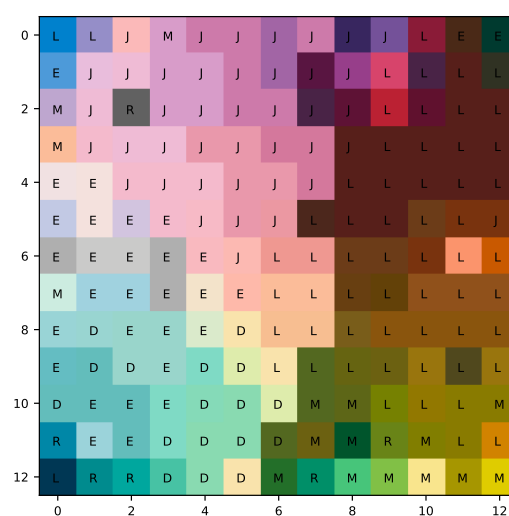

(e) Learnt SOM Cells

1.17. *Cakchiquel*;  $|\mathcal{W}| = 28$

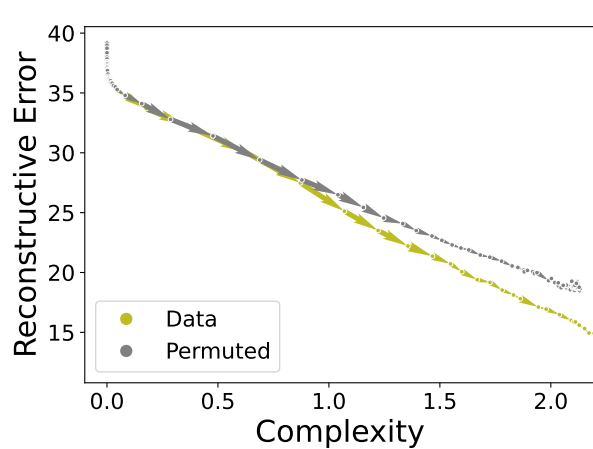

(a) Learning Space

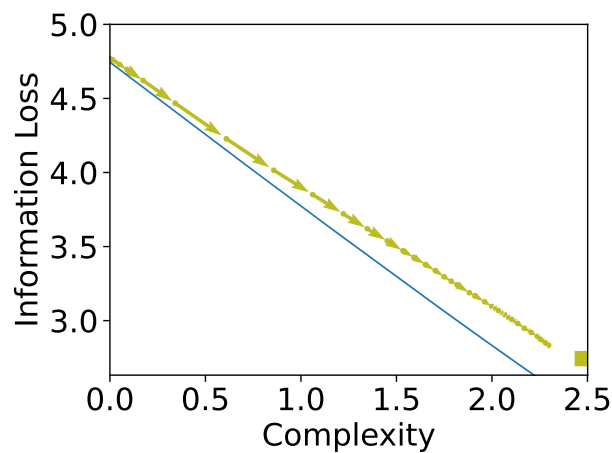

(b) Communicative Space

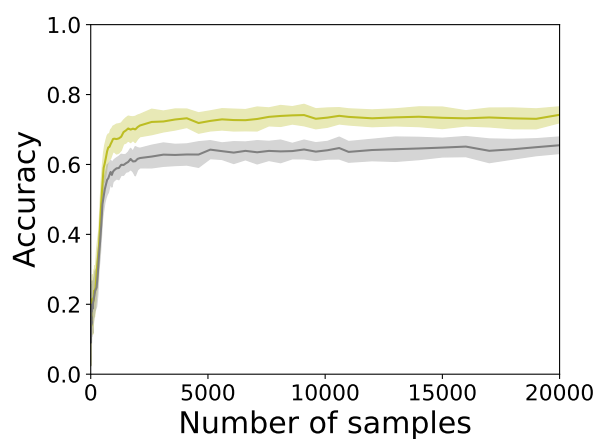

(c) Accuracy

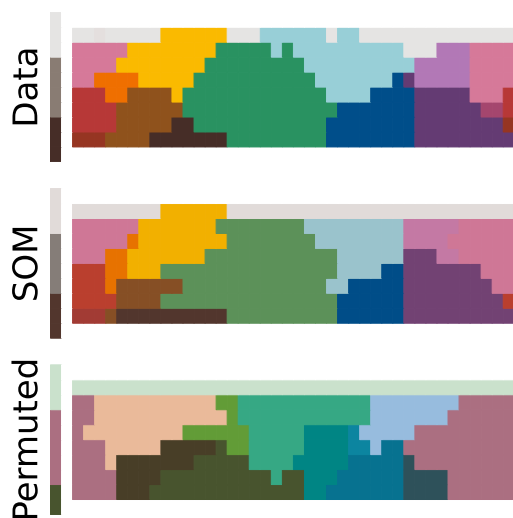

(d) Mode Maps

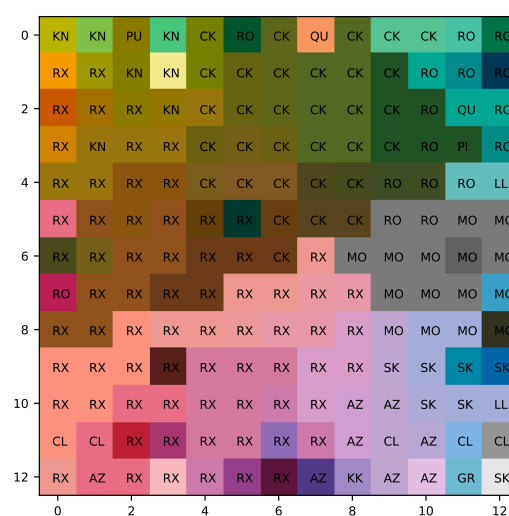

(e) Learnt SOM Cells

1.18. Ucayali Campa;  $|\mathcal{W}| = 17$

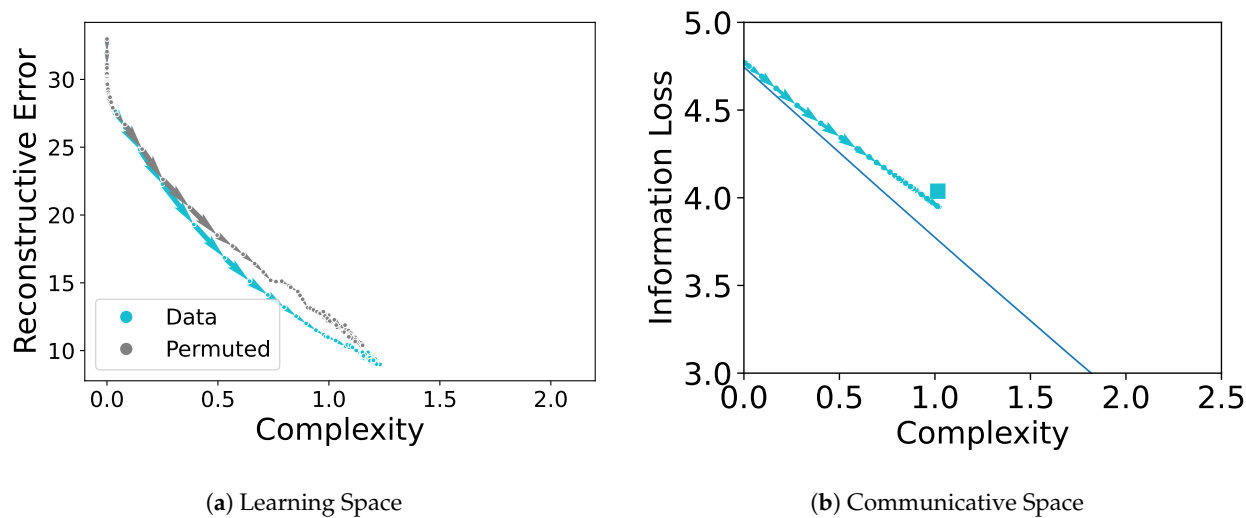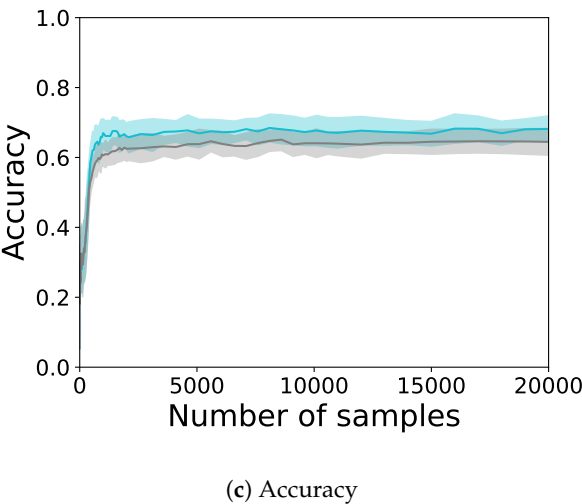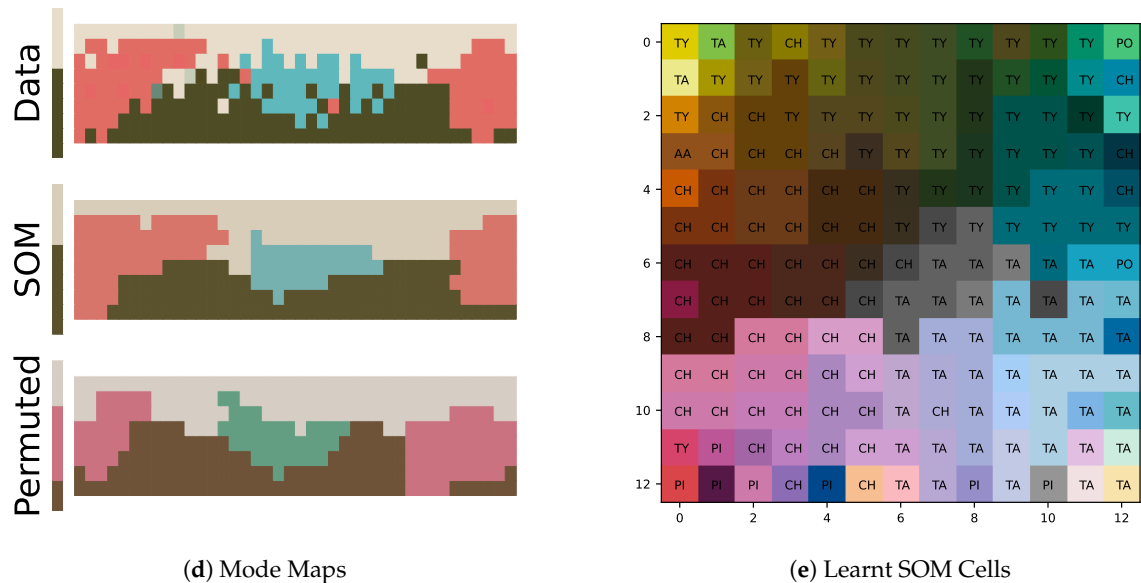

1.19. Camsa;  $|\mathcal{W}| = 31$

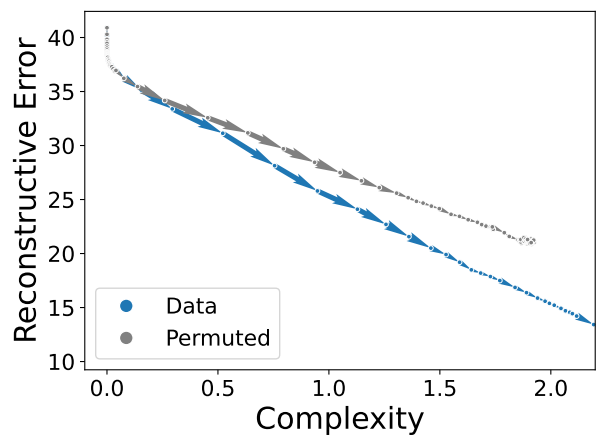

(a) Learning Space

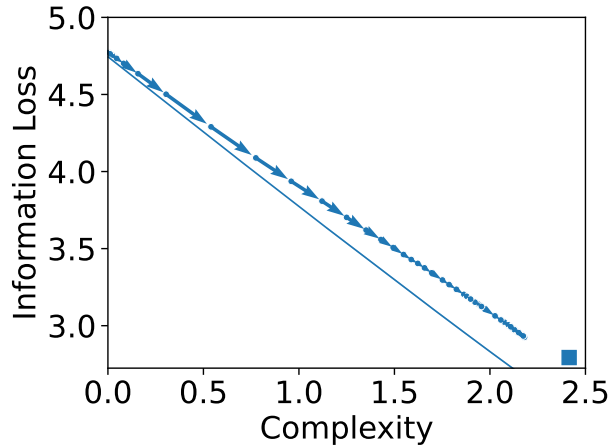

(b) Communicative Space

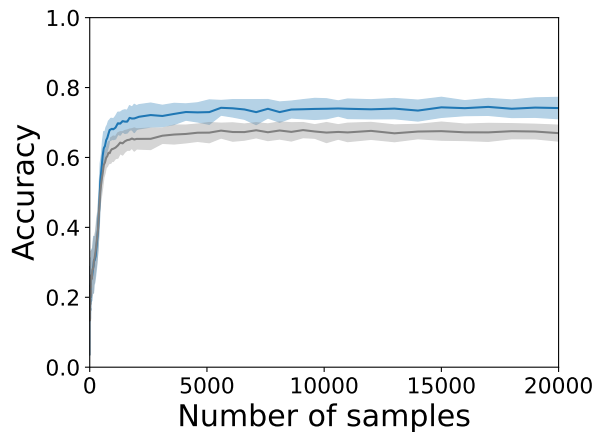

(c) Accuracy

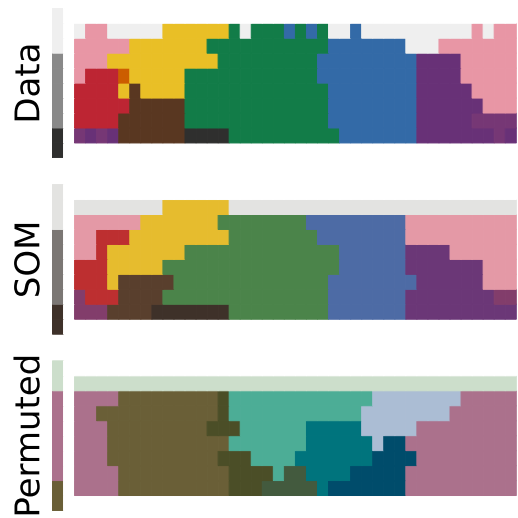

(d) Mode Maps

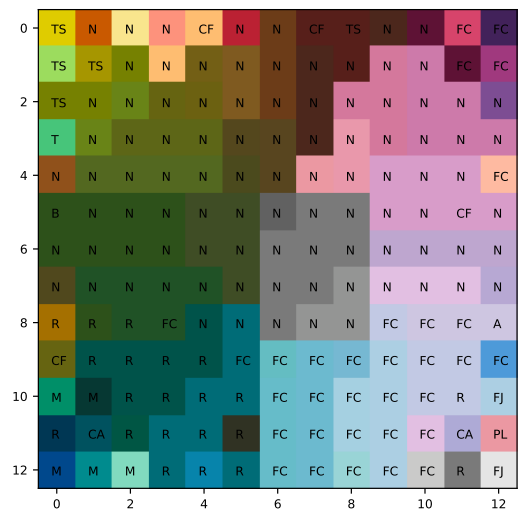

(e) Learnt SOM Cells



1.20. Candoshi;  $|\mathcal{W}| = 19$

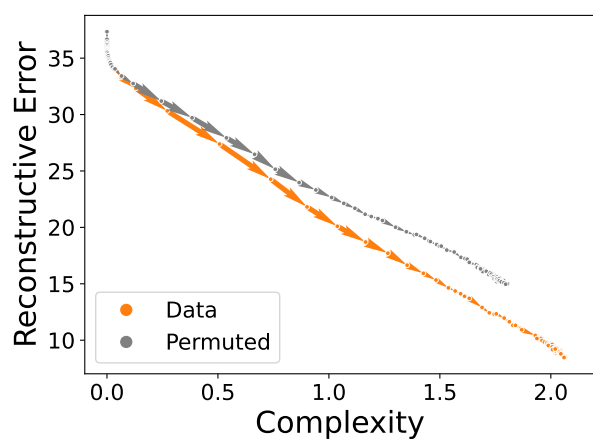

(a) Learning Space

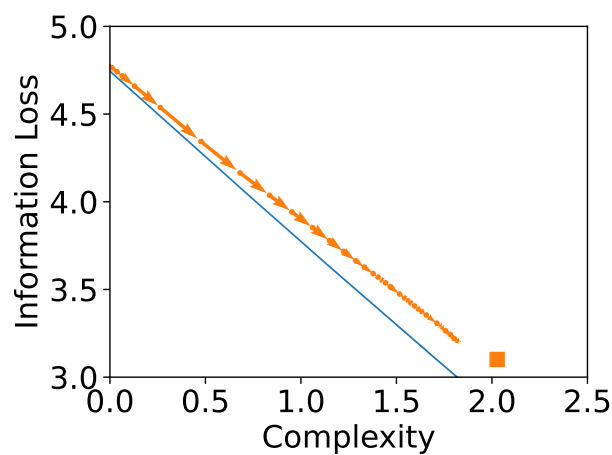

(b) Communicative Space

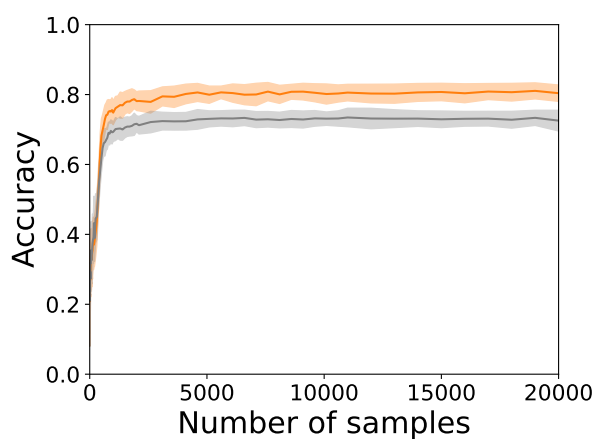

(c) Accuracy

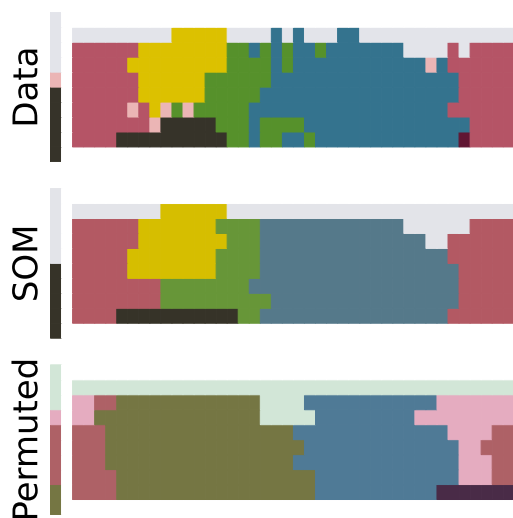

(d) Mode Maps

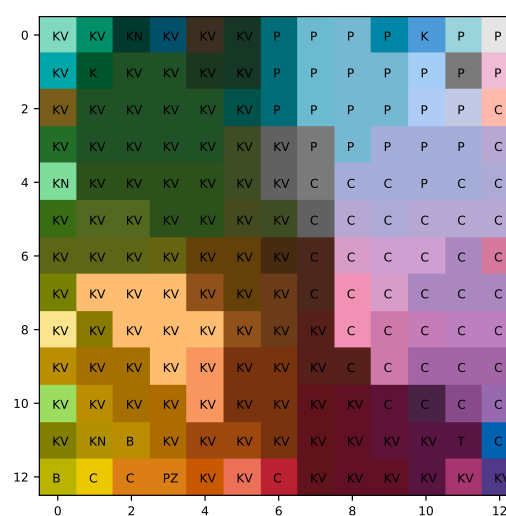

(e) Learnt SOM Cells

1.21. Cavineña;  $|\mathcal{W}| = 10$

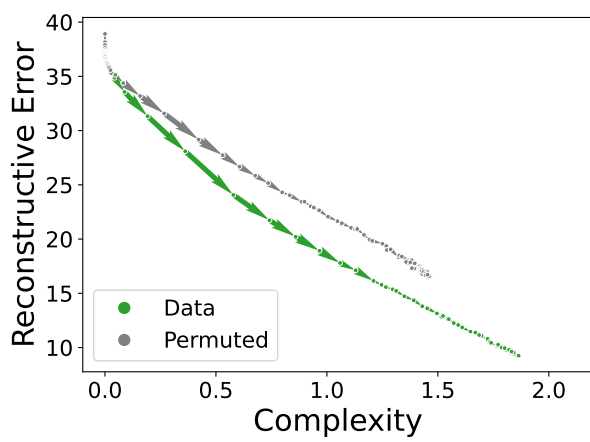

(a) Learning Space

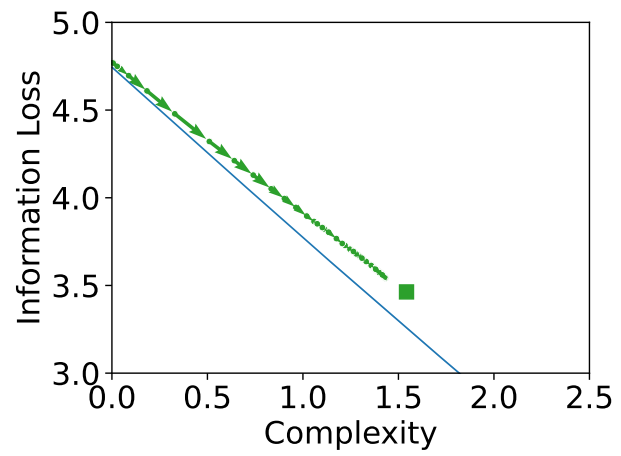

(b) Communicative Space

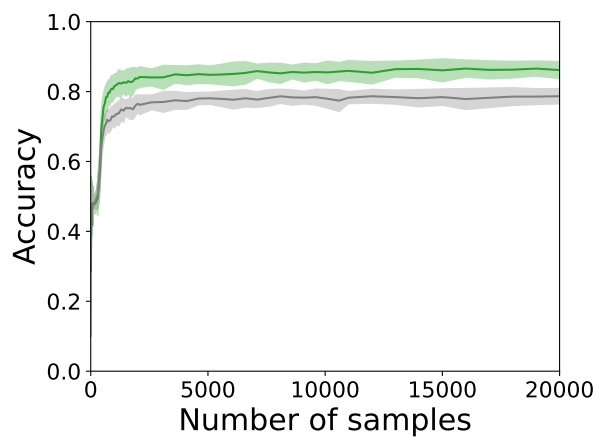

(c) Accuracy

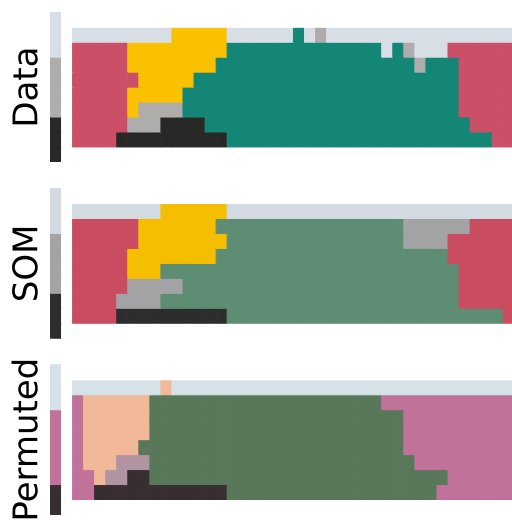

(d) Mode Maps

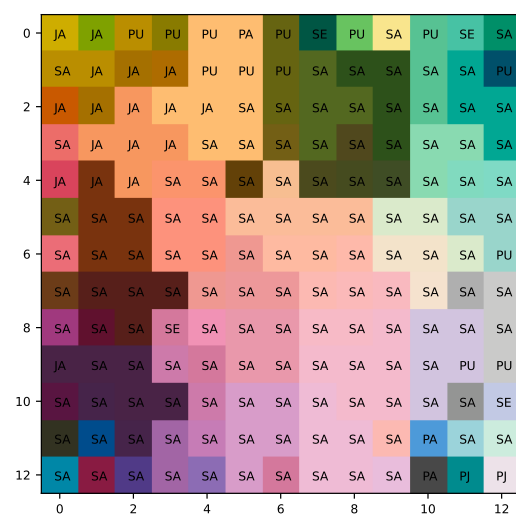

(e) Learnt SOM Cells

### 1.22. Cayapa; $|\mathcal{W}| = 13$

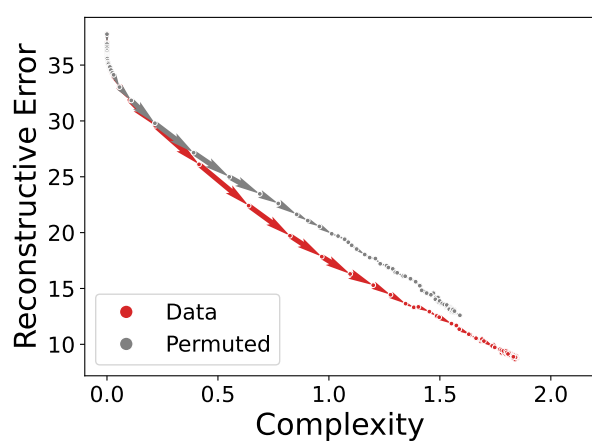

(a) Learning Space

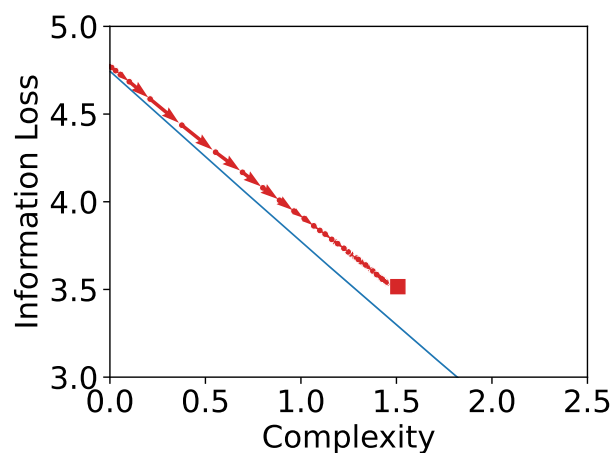

(b) Communicative Space

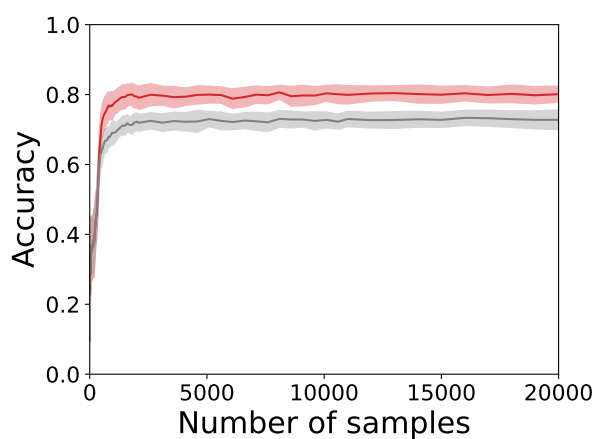

(c) Accuracy

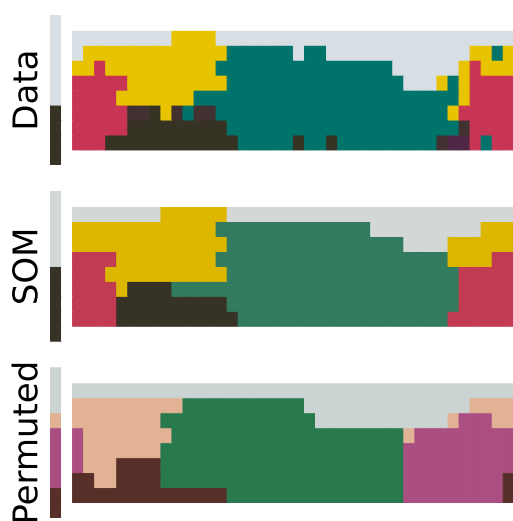

(d) Mode Maps

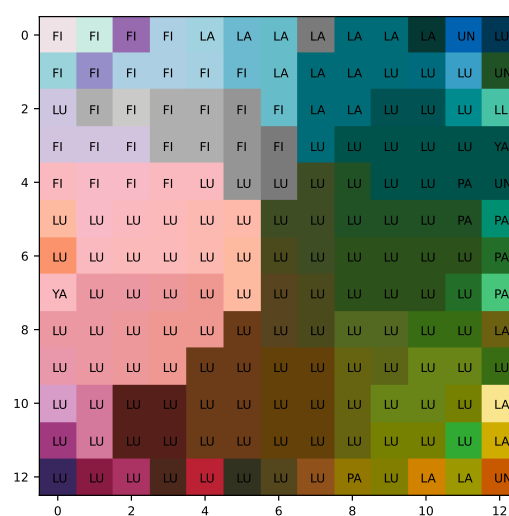

(e) Learnt SOM Cells

1.23. Chácobo;  $|\mathcal{W}| = 6$

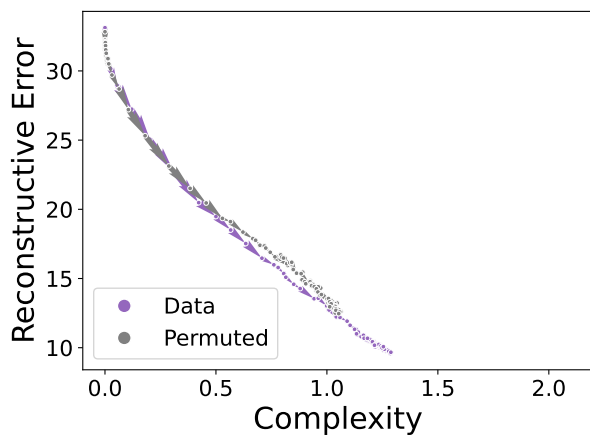

(a) Learning Space

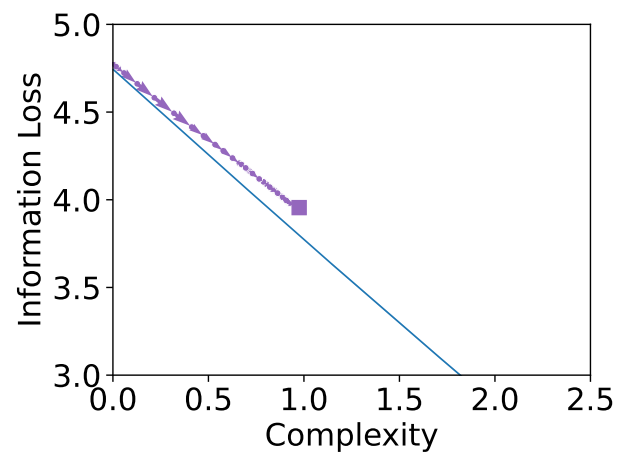

(b) Communicative Space

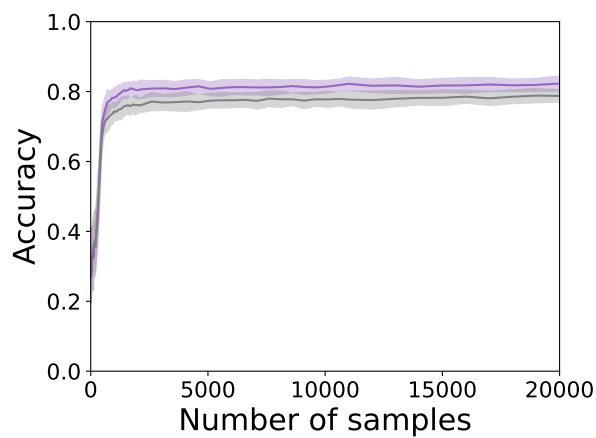

(c) Accuracy

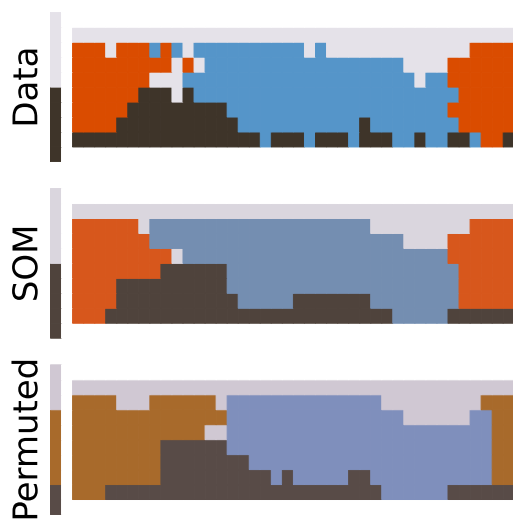

(d) Mode Maps

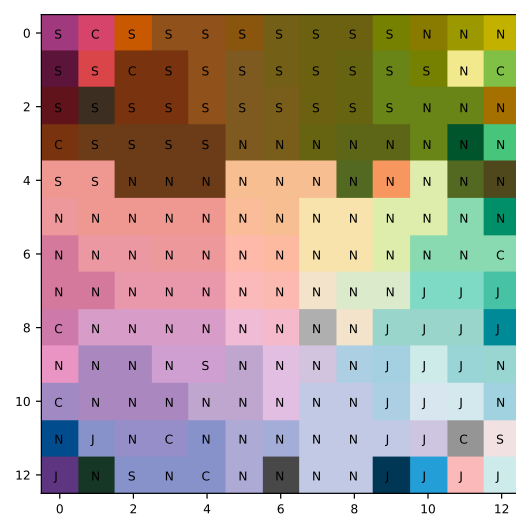

(e) Learnt SOM Cells

1.24. Chavacano;  $|\mathcal{W}| = 19$

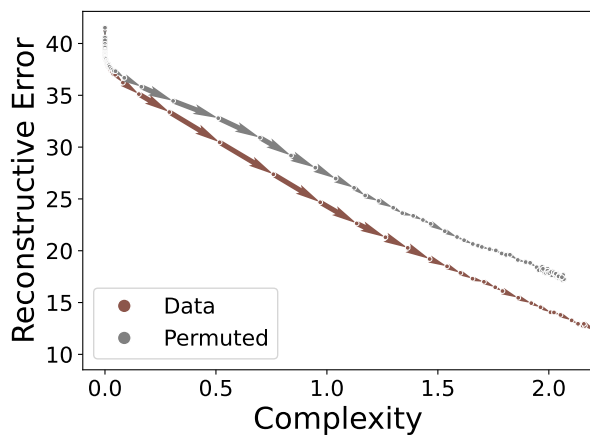

(a) Learning Space

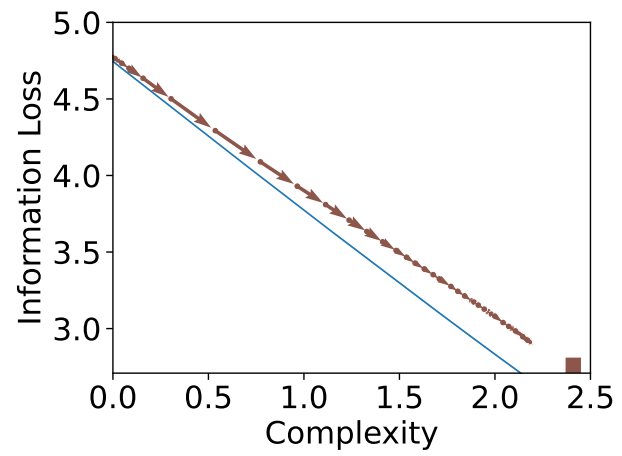

(b) Communicative Space

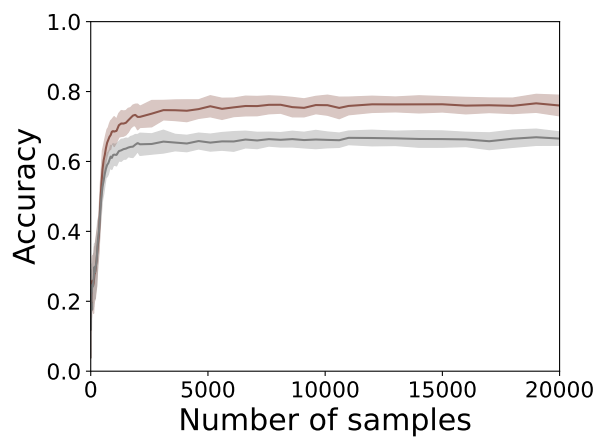

(c) Accuracy

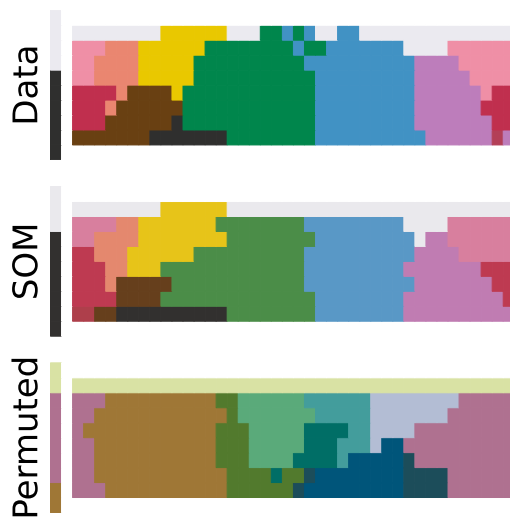

(d) Mode Maps

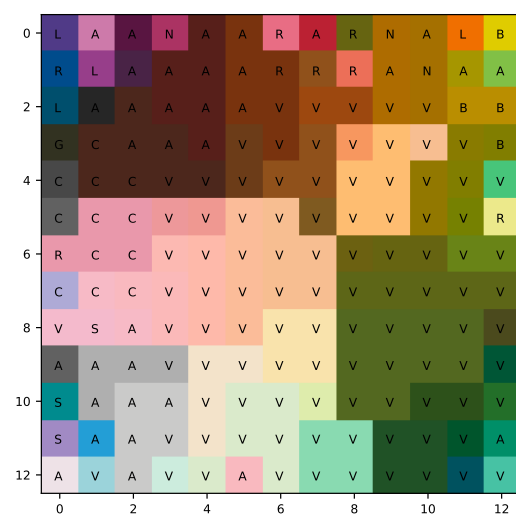

(e) Learnt SOM Cells

### 1.25. Chayahuita; $|\mathcal{W}| = 8$

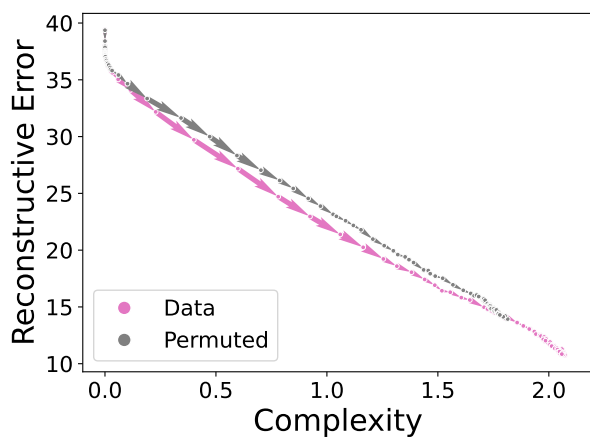

(a) Learning Space

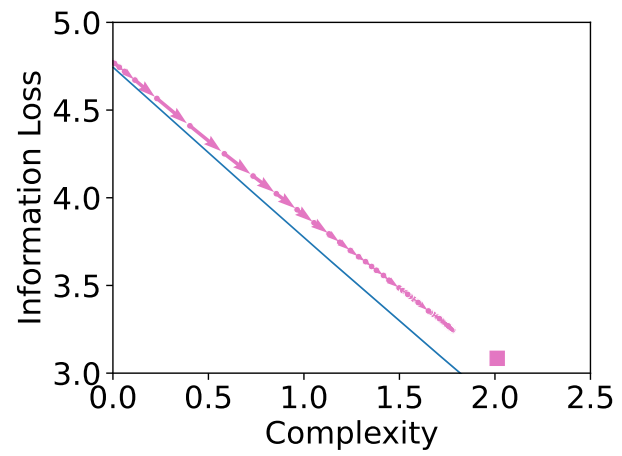

(b) Communicative Space

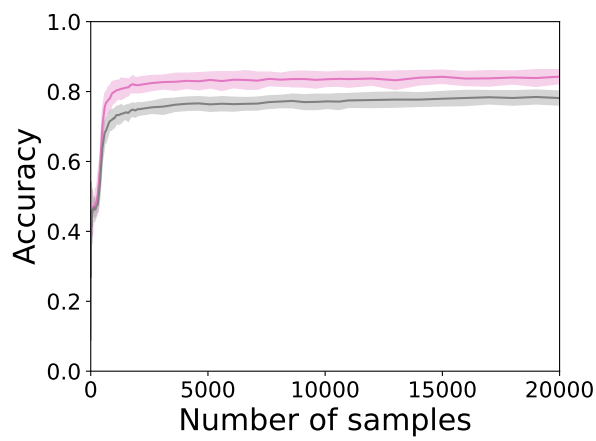

(c) Accuracy

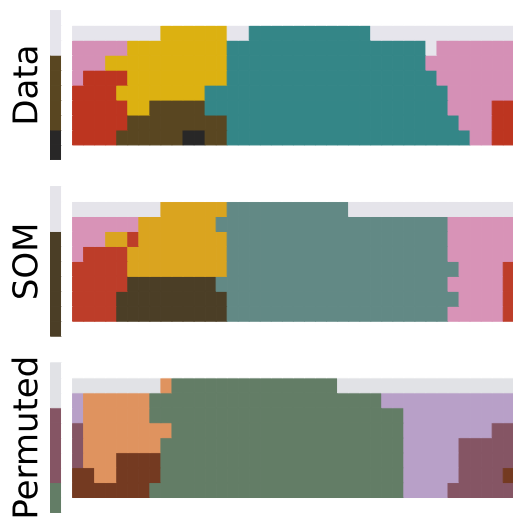

(d) Mode Maps

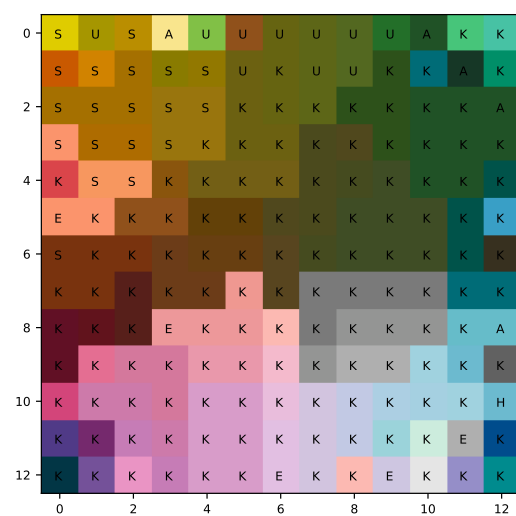

(e) Learnt SOM Cells

# 1.26. Chinanteco; $|W| = 12$

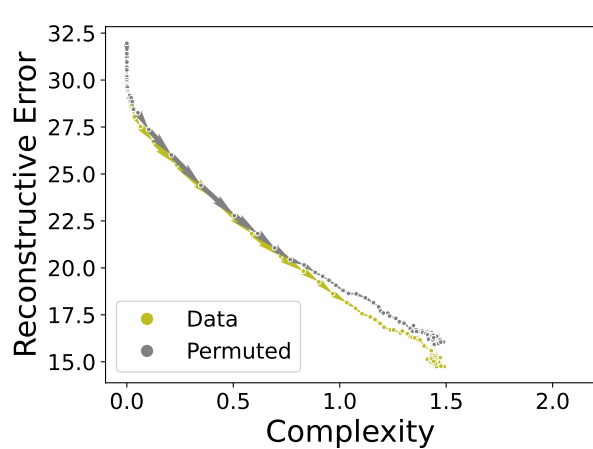

(a) Learning Space

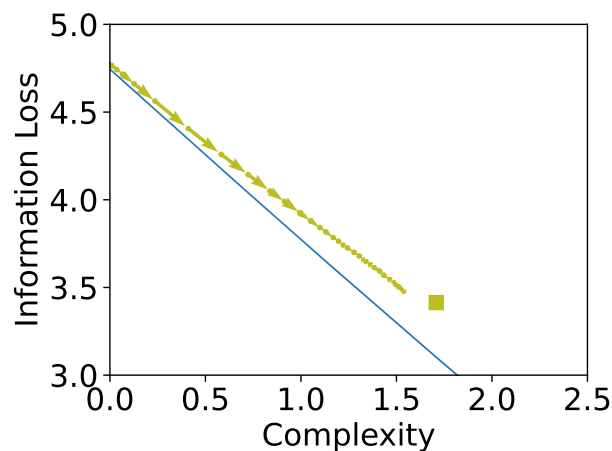

(b) Communicative Space

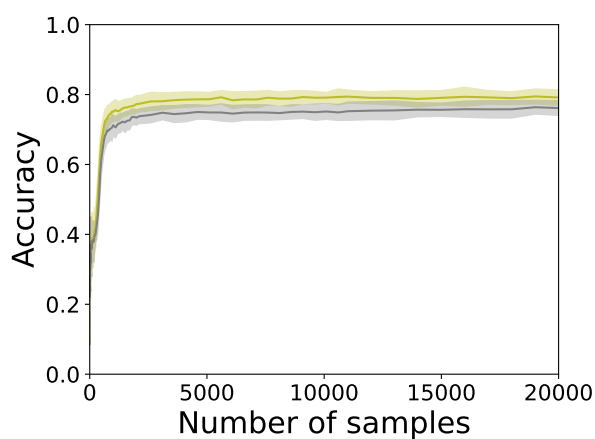

(c) Accuracy

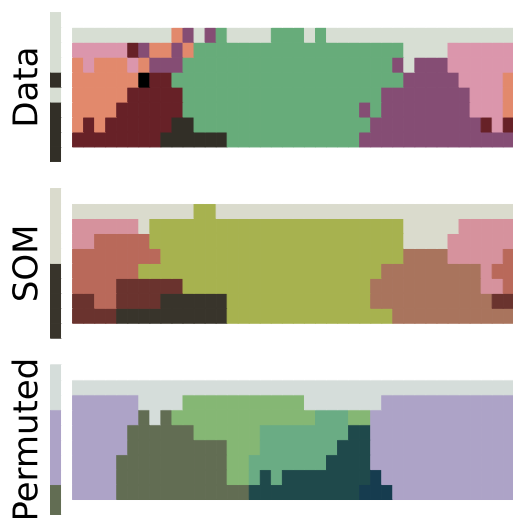

(d) Mode Maps

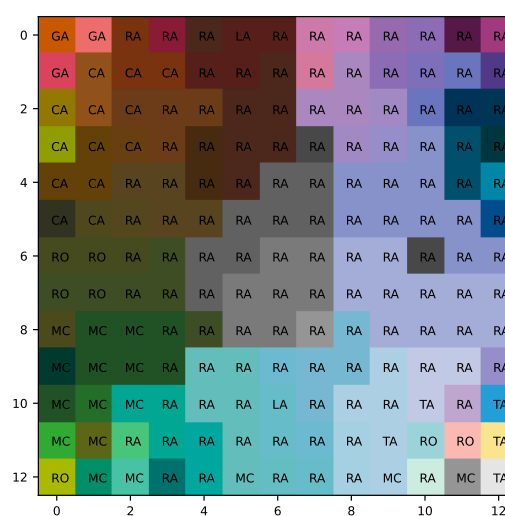

(e) Learnt SOM Cells

1.27. Chiquitano;  $|\mathcal{W}| = 47$

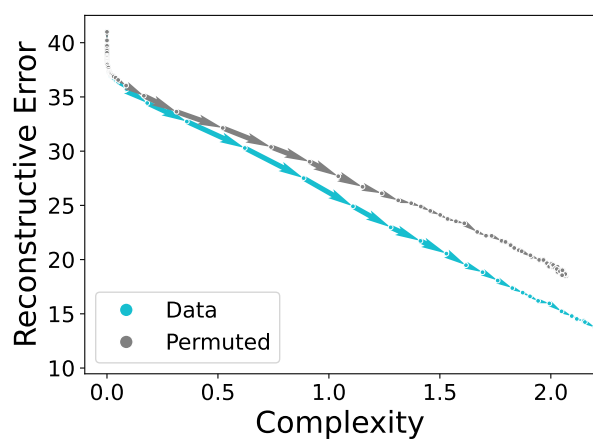

(a) Learning Space

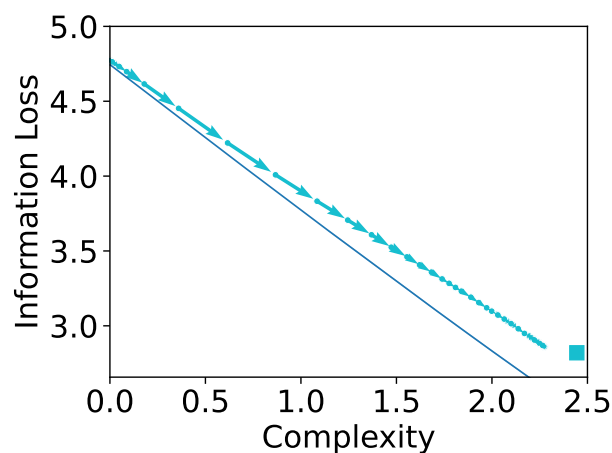

(b) Communicative Space

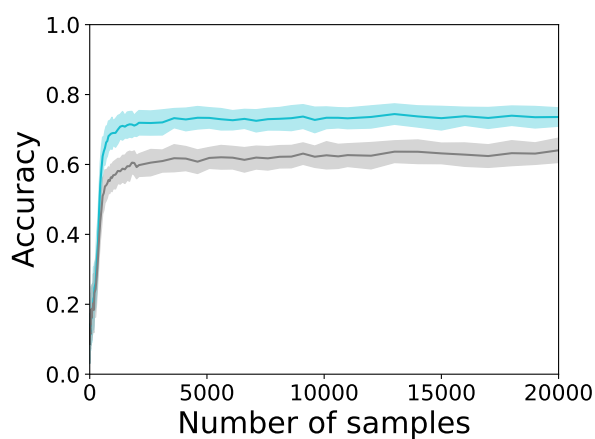

(c) Accuracy

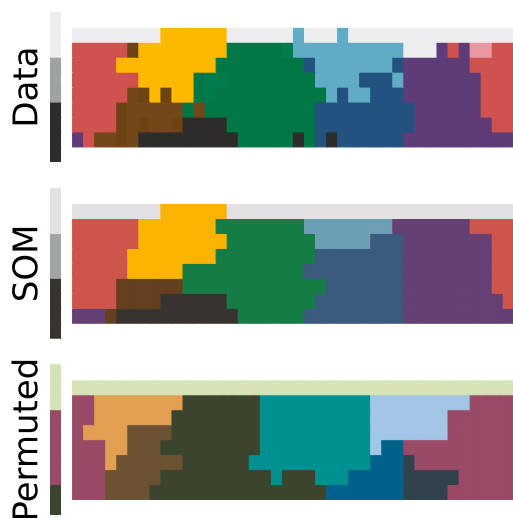

(d) Mode Maps

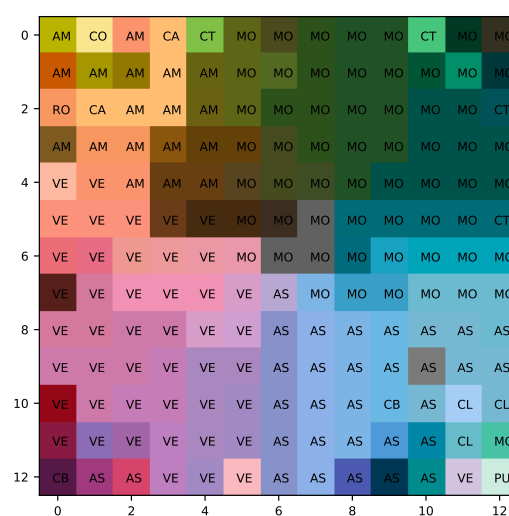

(e) Learnt SOM Cells



1.28. Chumburu;  $|\mathcal{W}| = 24$

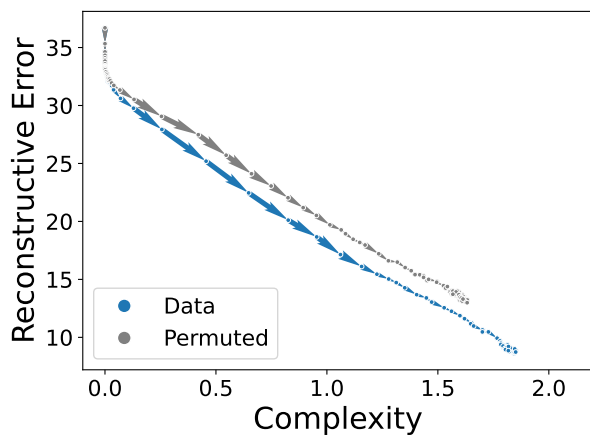

(a) Learning Space

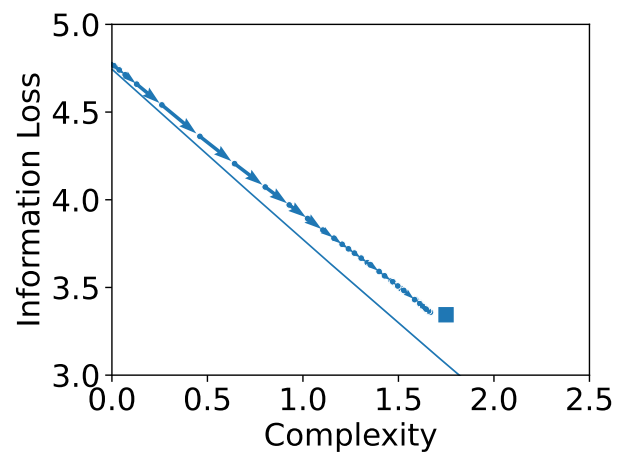

(b) Communicative Space

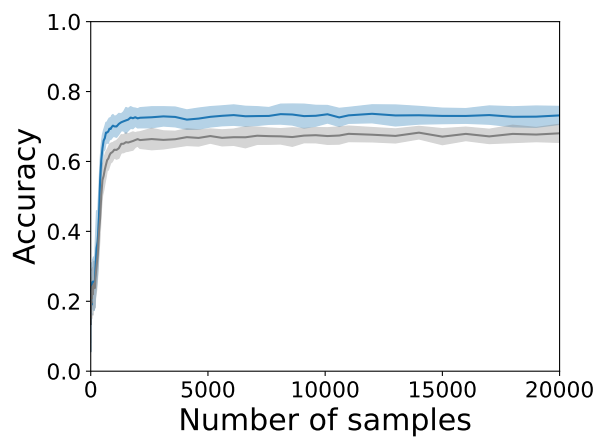

(c) Accuracy

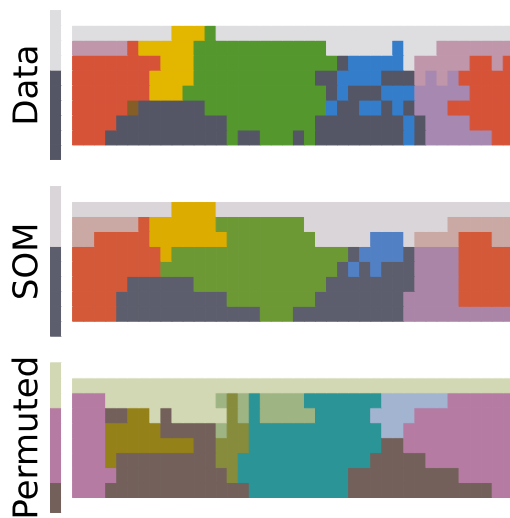

(d) Mode Maps

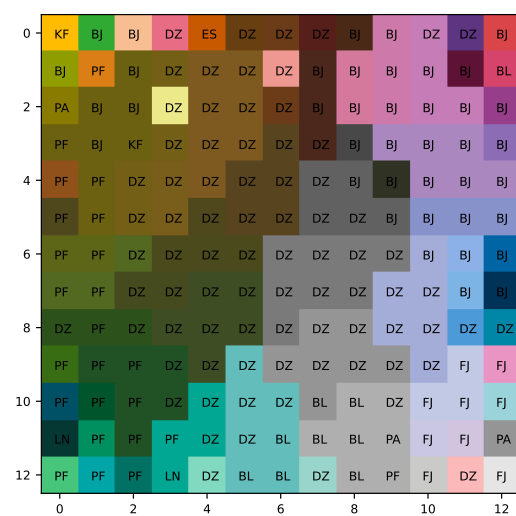

(e) Learnt SOM Cells

1.29. Cofán;  $|\mathcal{W}| = 10$

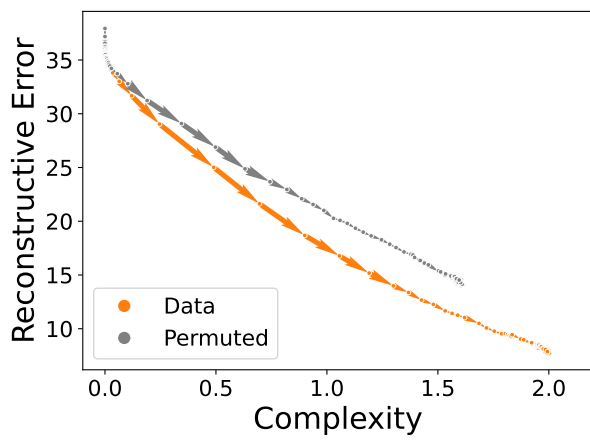

(a) Learning Space

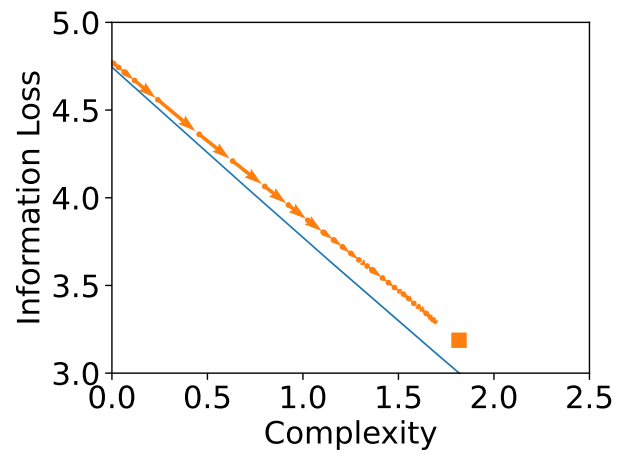

(b) Communicative Space

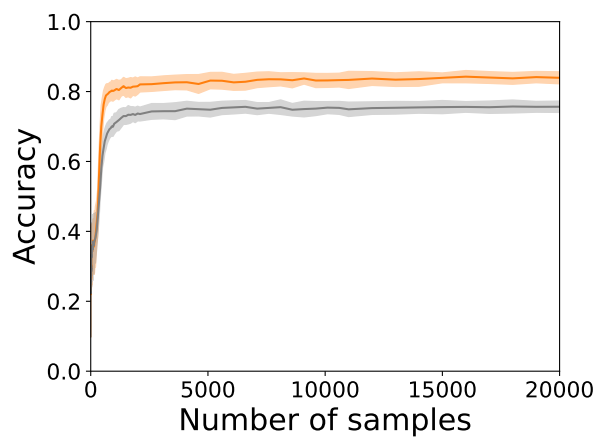

(c) Accuracy

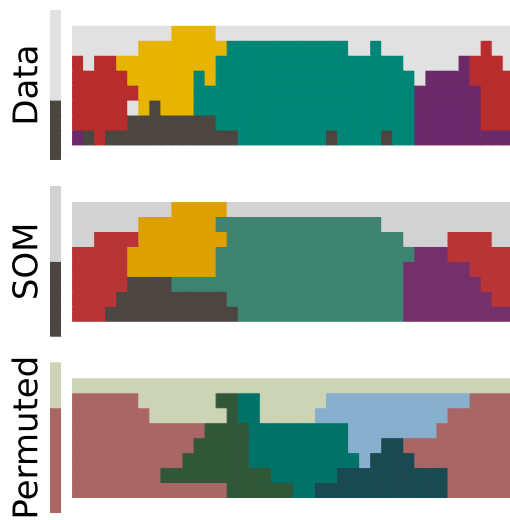

(d) Mode Maps

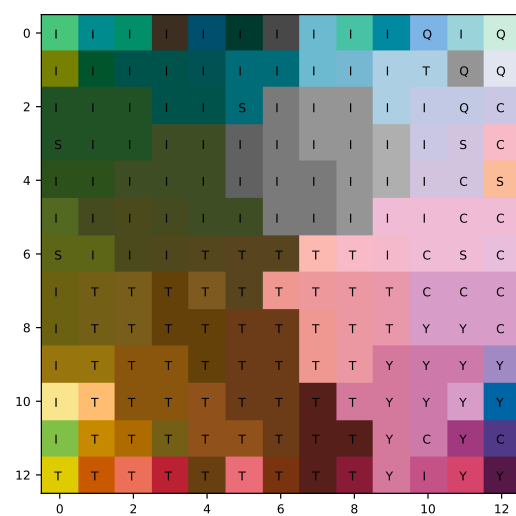

(e) Learnt SOM Cells

### 1.30. Colorado; $|\mathcal{W}| = 6$

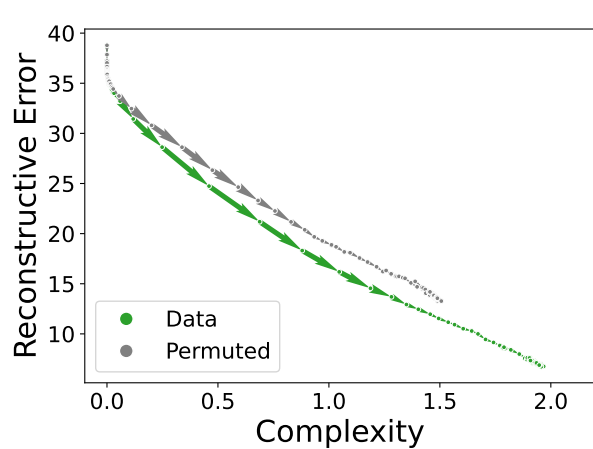

(a) Learning Space

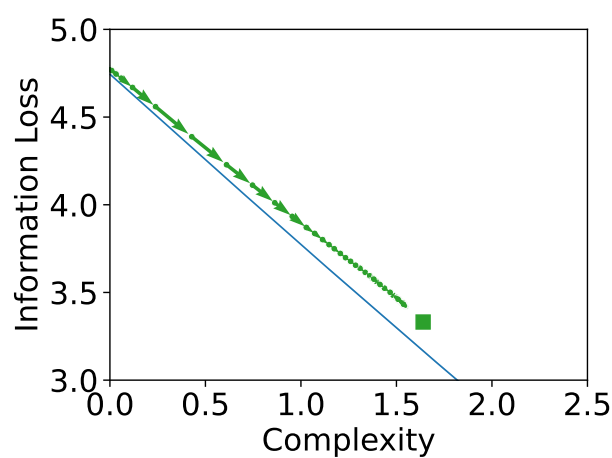

(b) Communicative Space

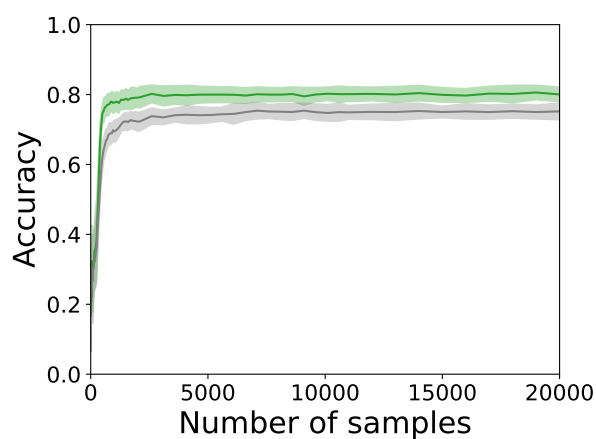

(c) Accuracy

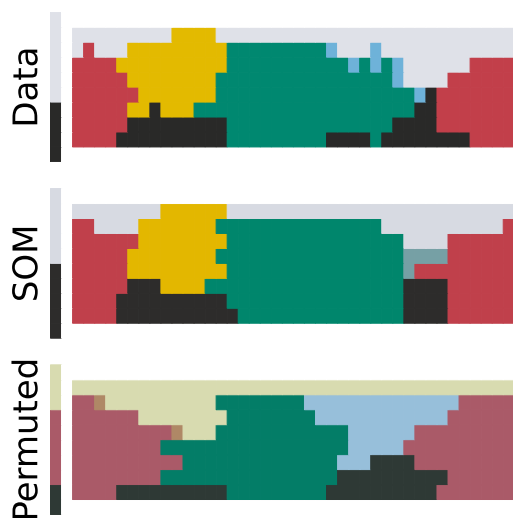

(d) Mode Maps

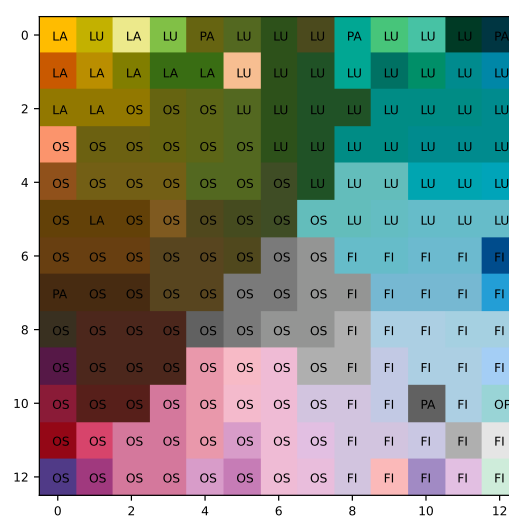

(e) Learnt SOM Cells

1.31. Eastern Cree;  $|\mathcal{W}| = 8$

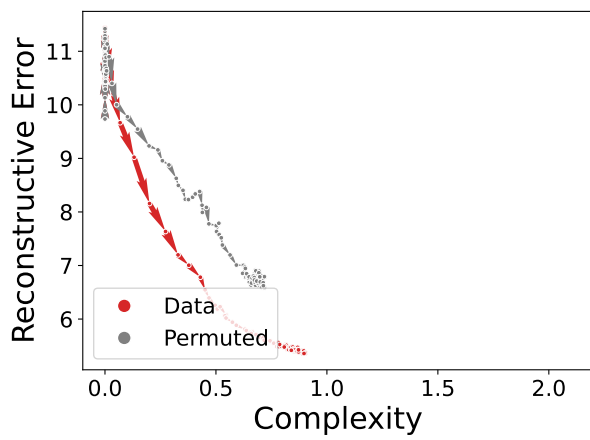

(a) Learning Space

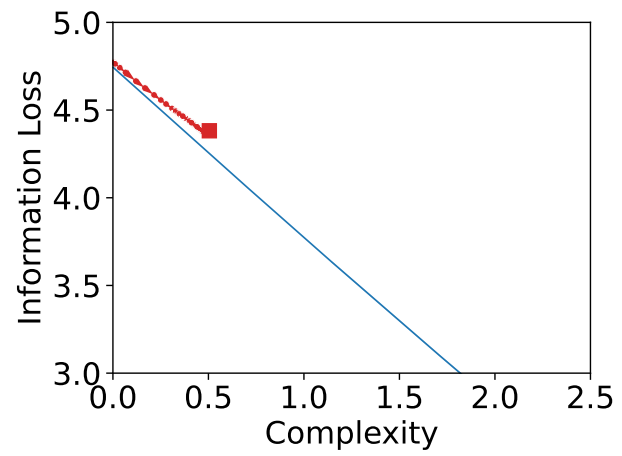

(b) Communicative Space

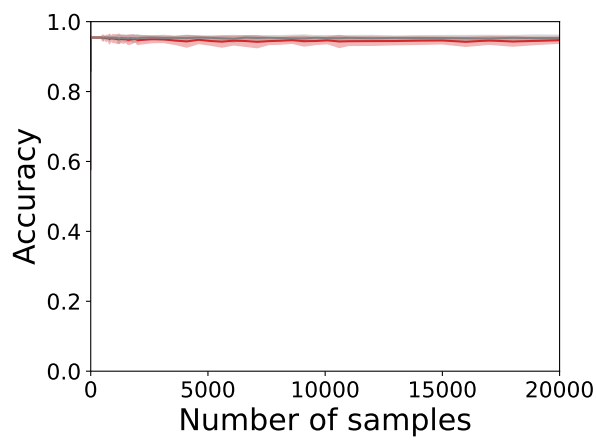

(c) Accuracy

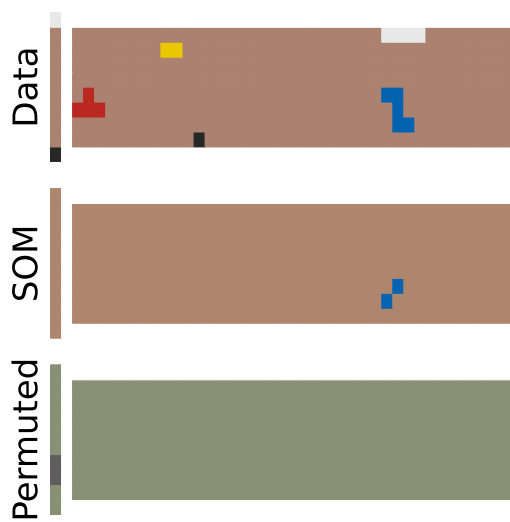

(d) Mode Maps

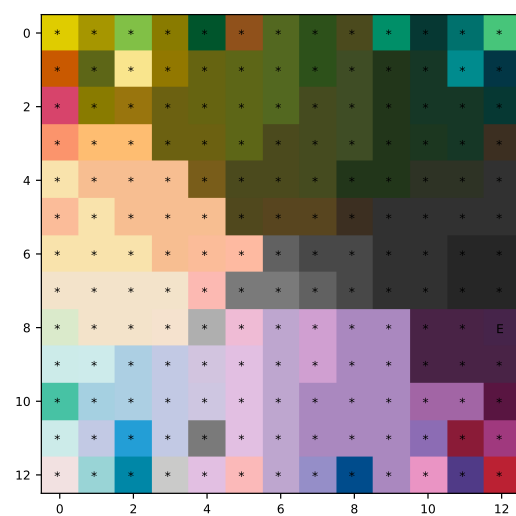

(e) Learnt SOM Cells

### 1.32. Culina; $|\mathcal{W}| = 27$

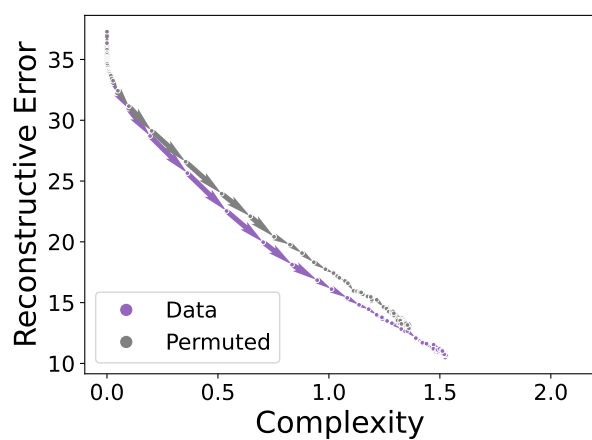

(a) Learning Space

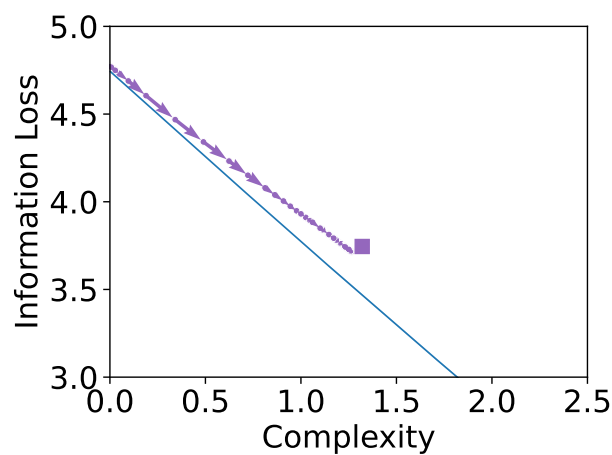

(b) Communicative Space

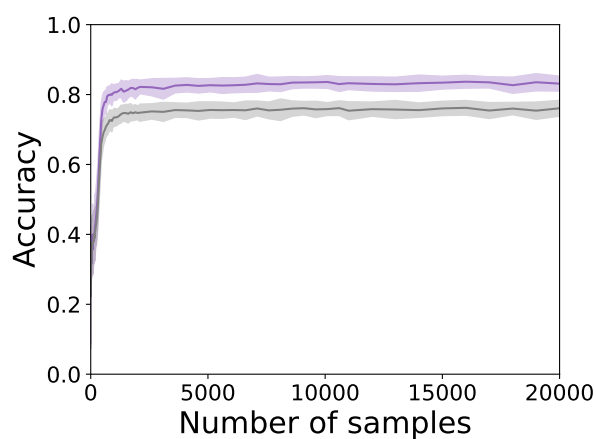

(c) Accuracy

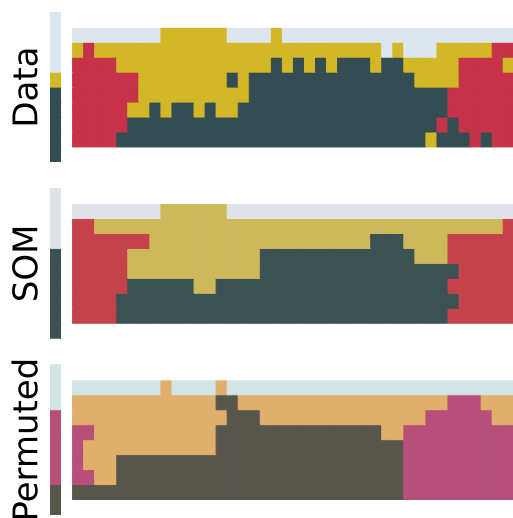

(d) Mode Maps

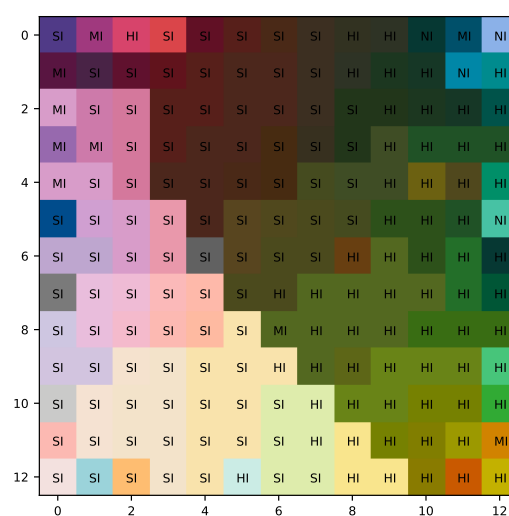

(e) Learnt SOM Cells

### 1.33. Didinga; $|\mathcal{W}| = 8$

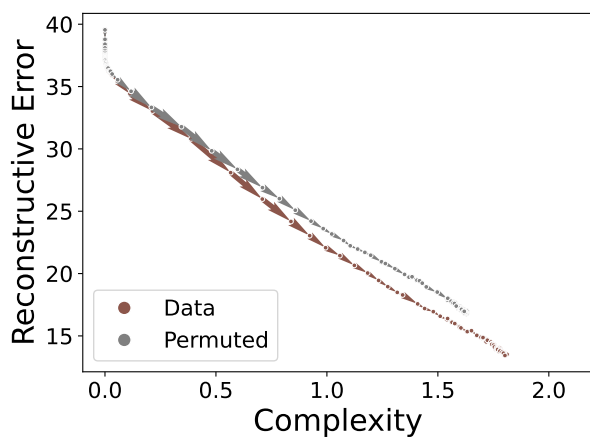

(a) Learning Space

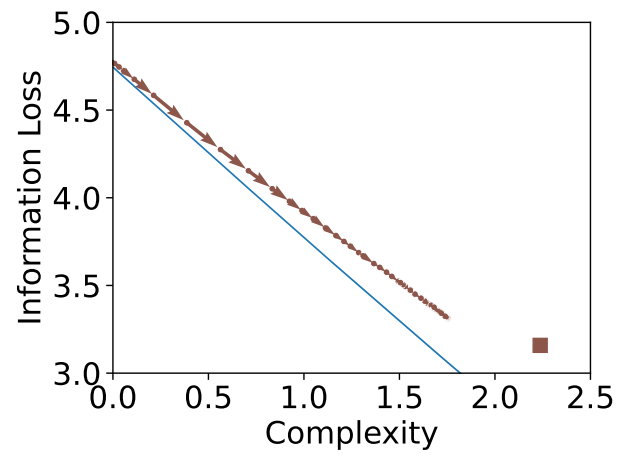

(b) Communicative Space

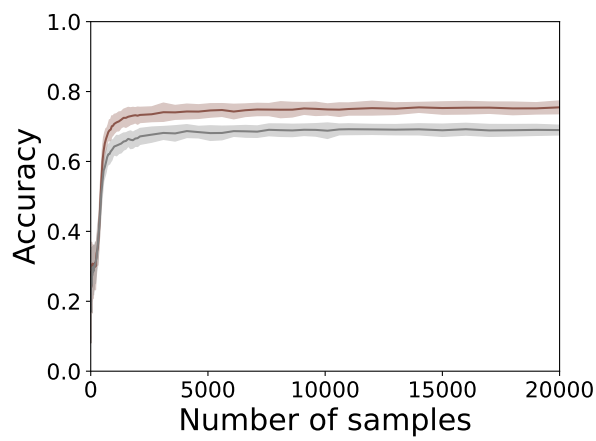

(c) Accuracy

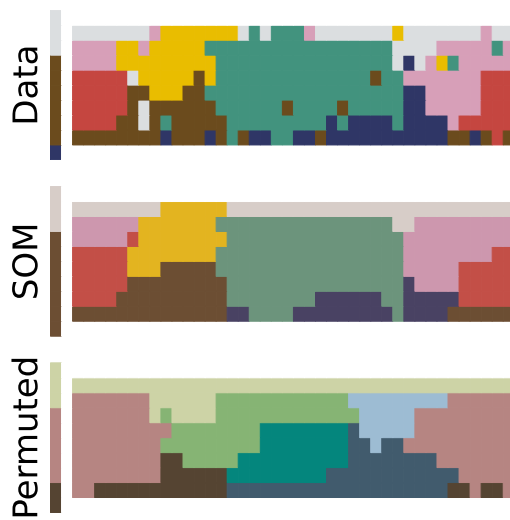

(d) Mode Maps

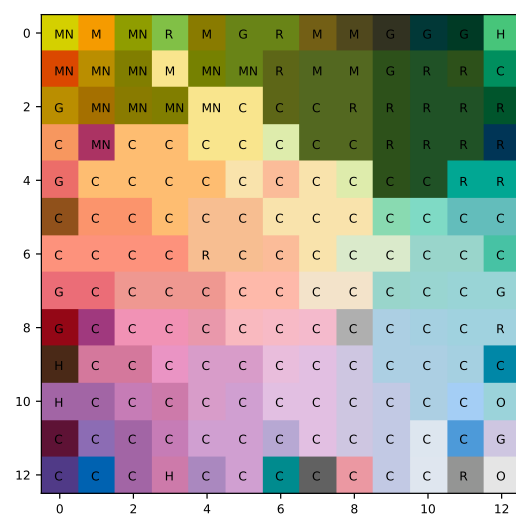

(e) Learnt SOM Cells

1.34. Djuka;  $|\mathcal{W}| = 23$

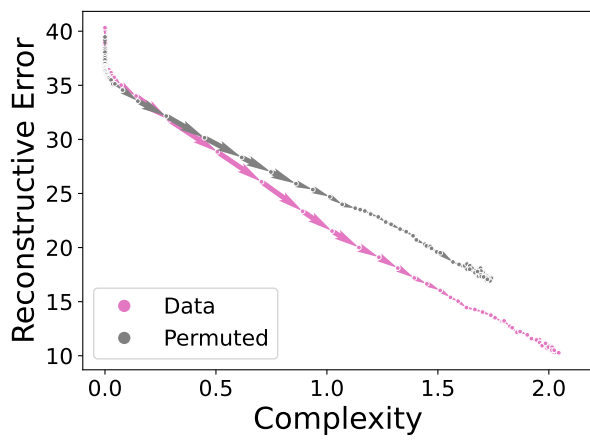

(a) Learning Space

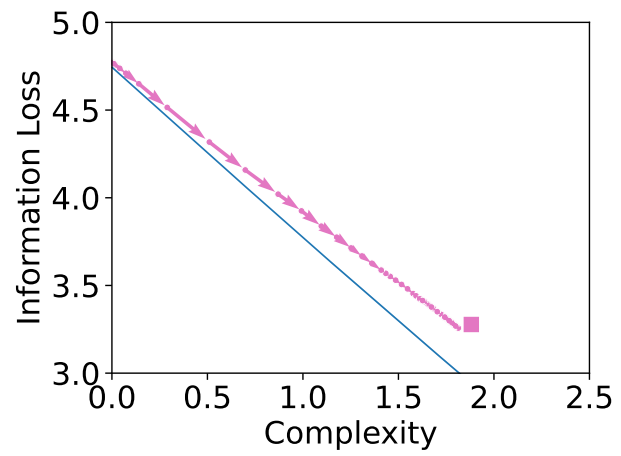

(b) Communicative Space

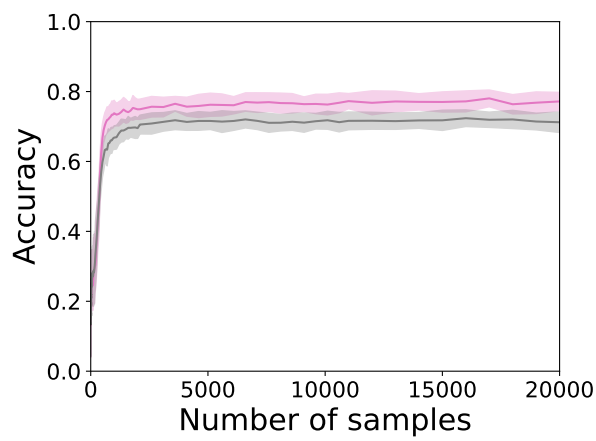

(c) Accuracy

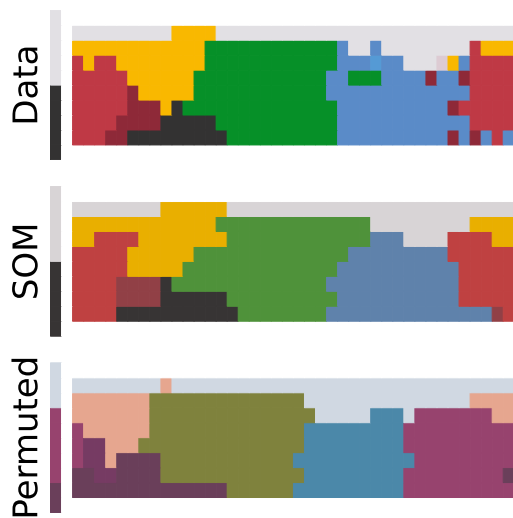

(d) Mode Maps

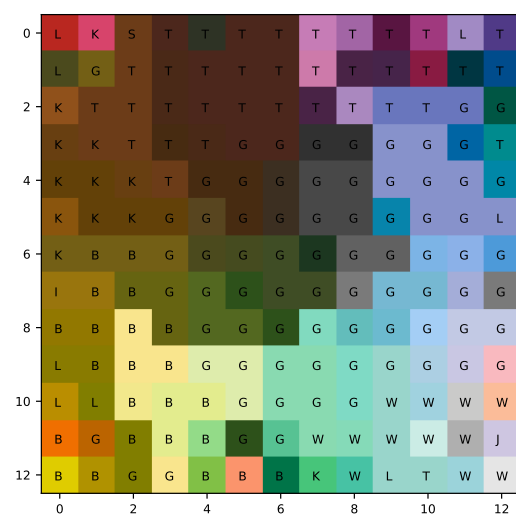

(e) Learnt SOM Cells

### 1.35. *Dyimini*; $|\mathcal{W}| = 13$

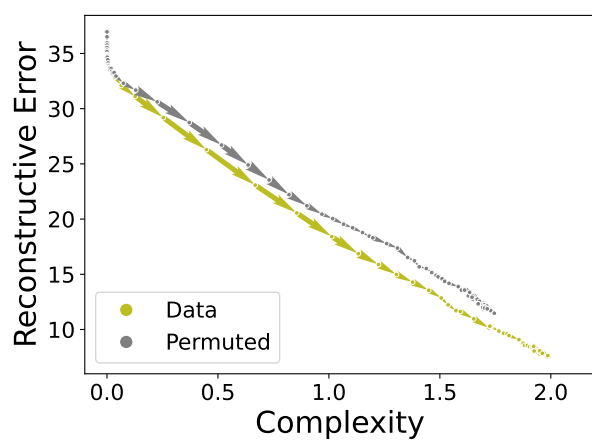

(a) Learning Space

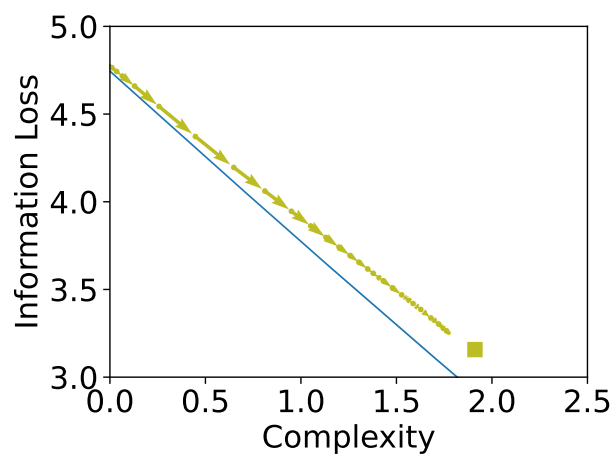

(b) Communicative Space

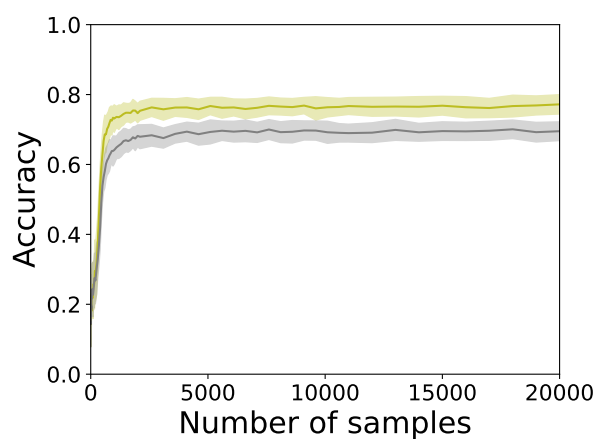

(c) Accuracy

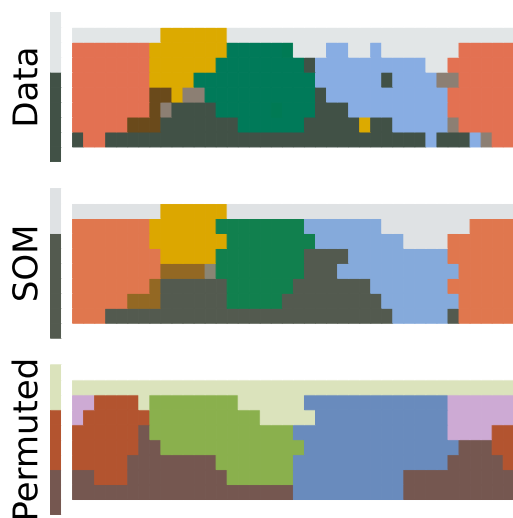

(d) Mode Maps

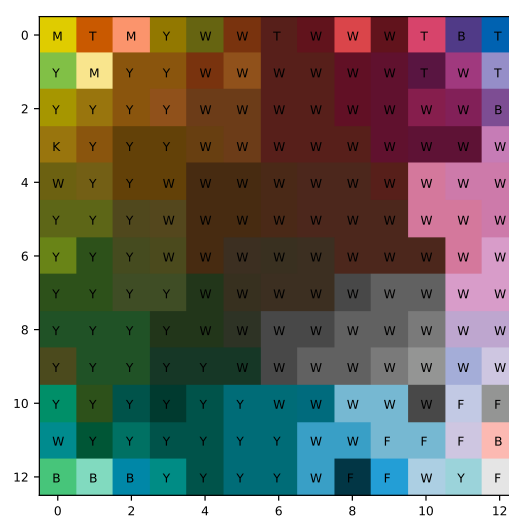

(e) Learnt SOM Cells



### 1.36. Ejagam; $|\mathcal{W}| = 8$

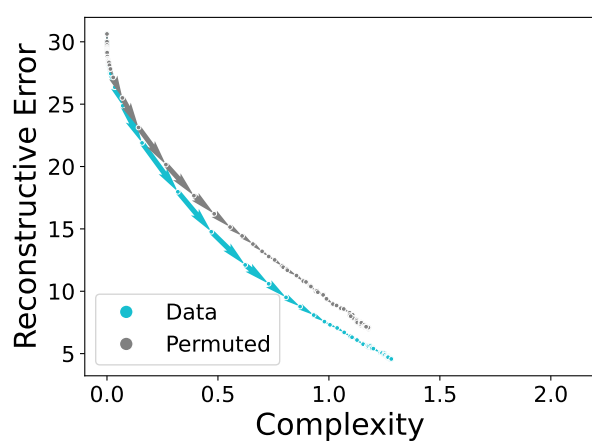

(a) Learning Space

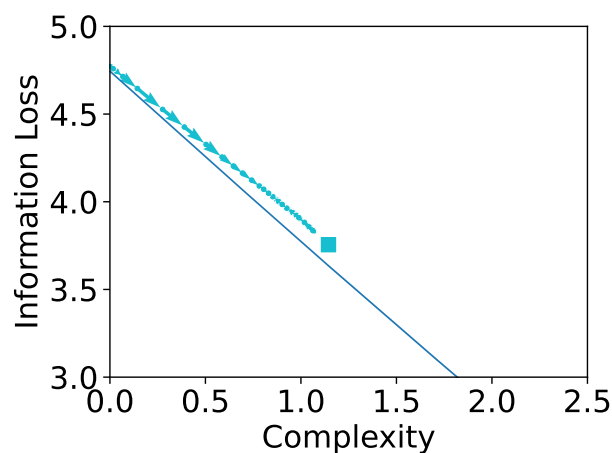

(b) Communicative Space

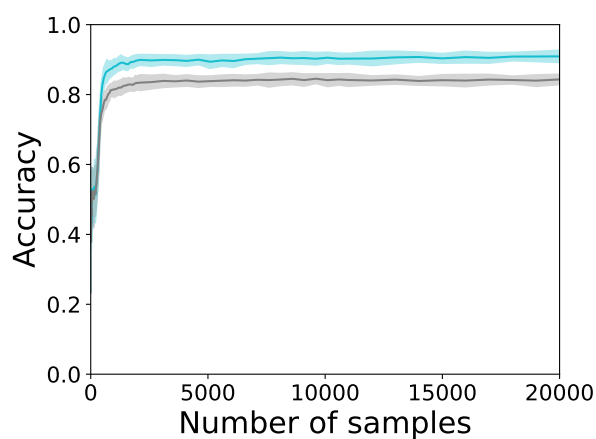

(c) Accuracy

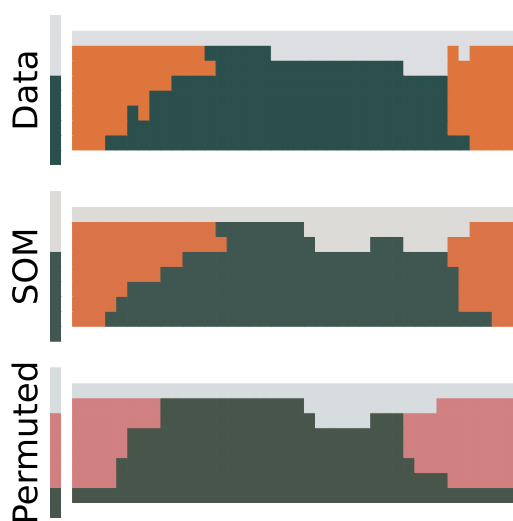

(d) Mode Maps

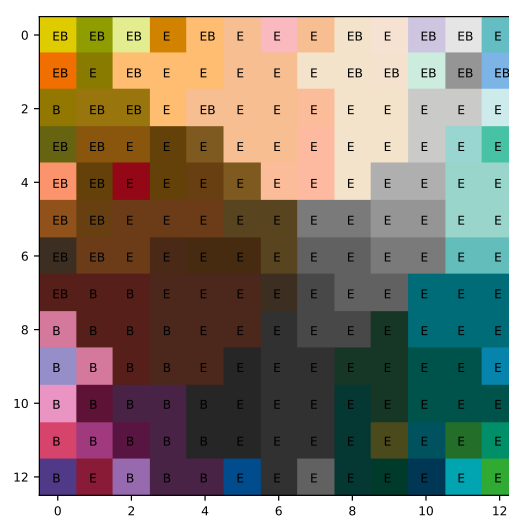

(e) Learnt SOM Cells

1.37. Ese Ejja;  $|\mathcal{W}| = 13$

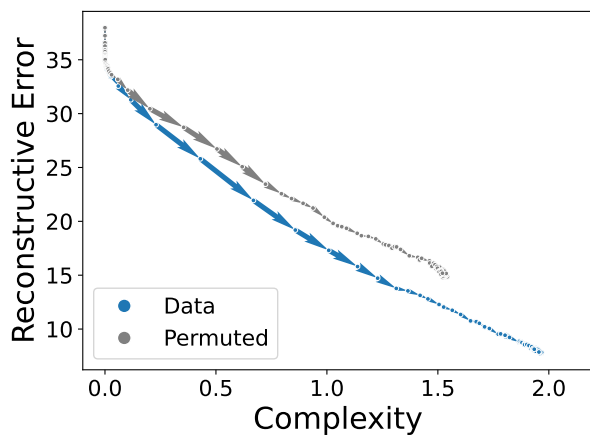

(a) Learning Space

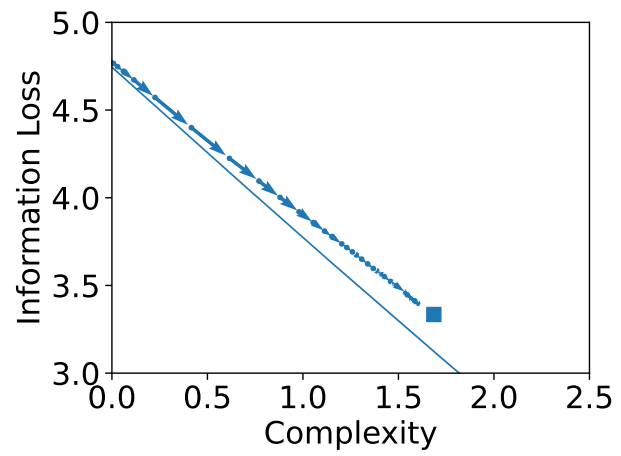

(b) Communicative Space

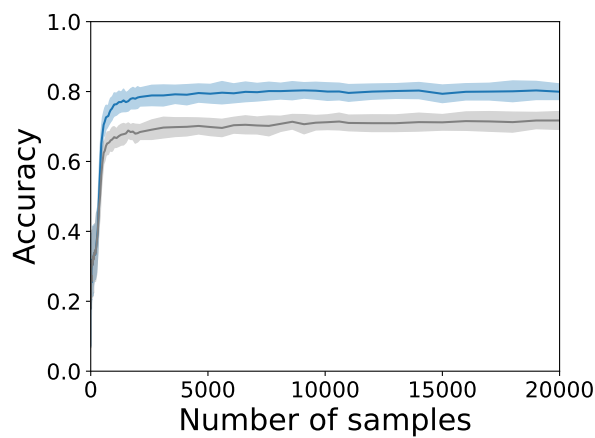

(c) Accuracy

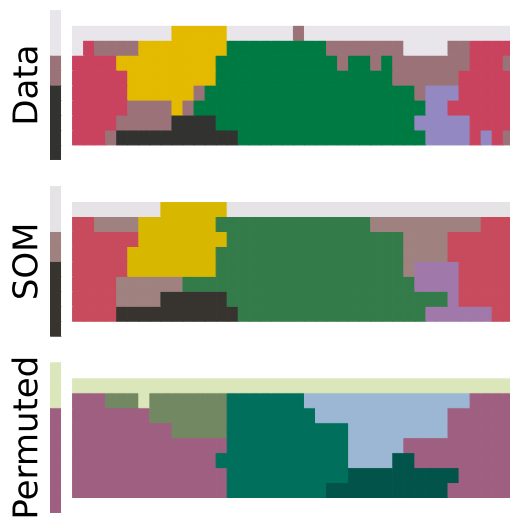

(d) Mode Maps

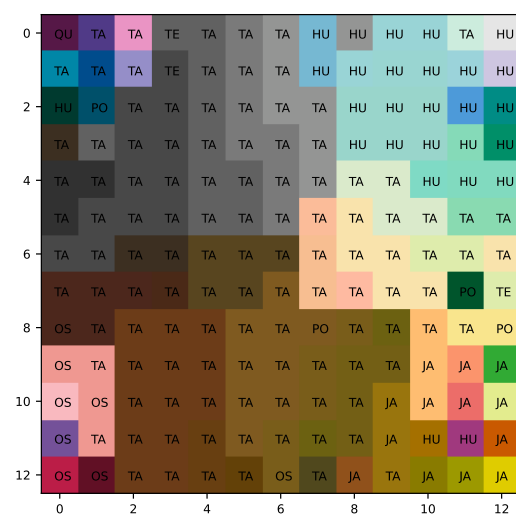

(e) Learnt SOM Cells

1.38. Carib;  $|\mathcal{W}| = 19$

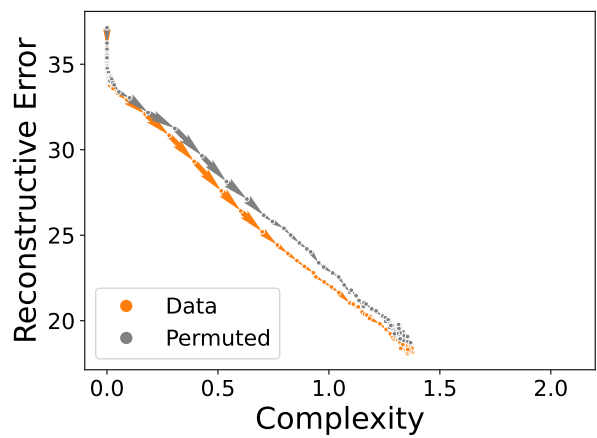

(a) Learning Space

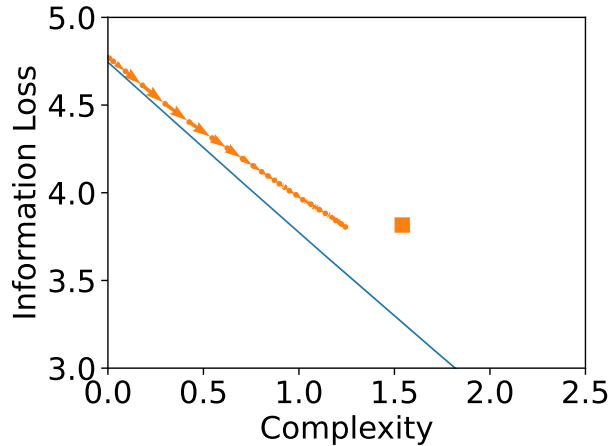

(b) Communicative Space

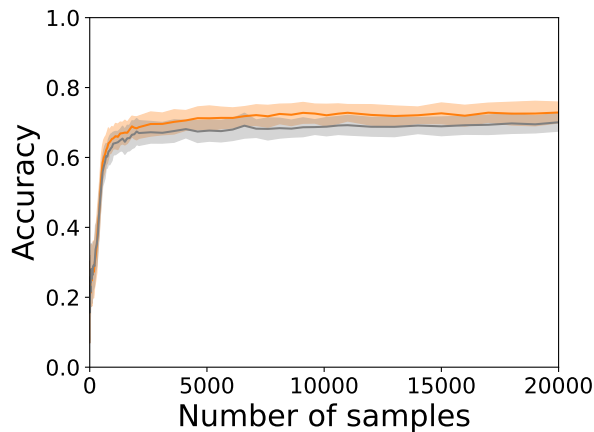

(c) Accuracy

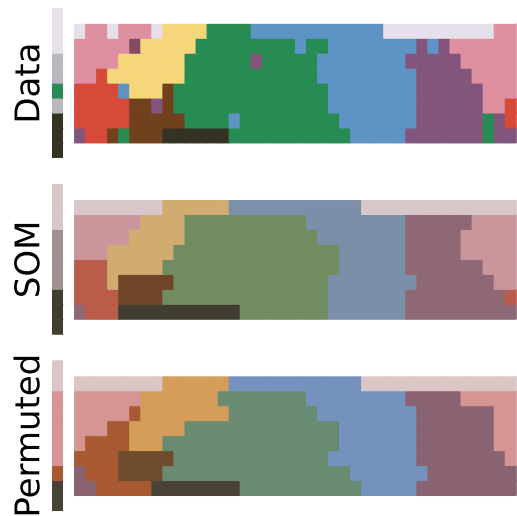

(d) Mode Maps

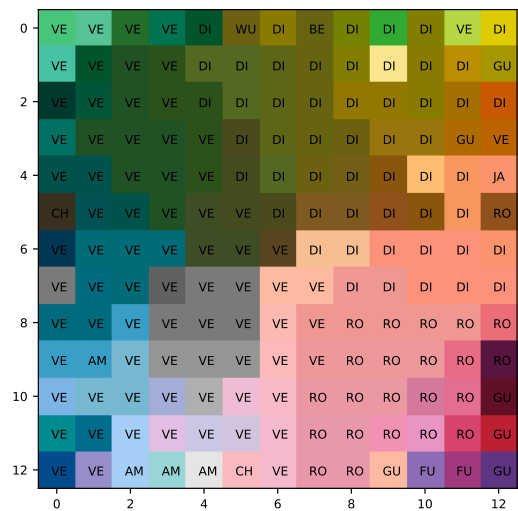

(e) Learnt SOM Cells

1.39. Guahibo;  $|\mathcal{W}| = 15$

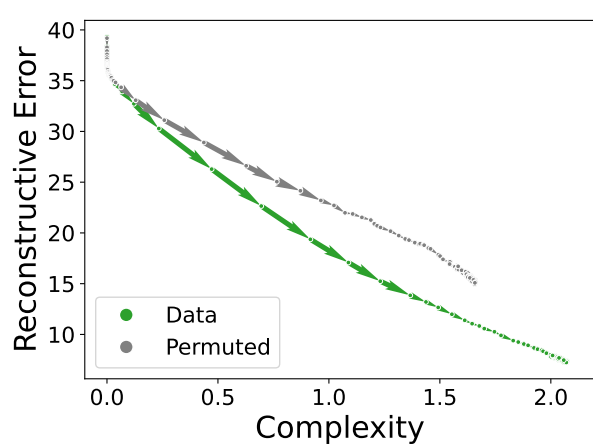

(a) Learning Space

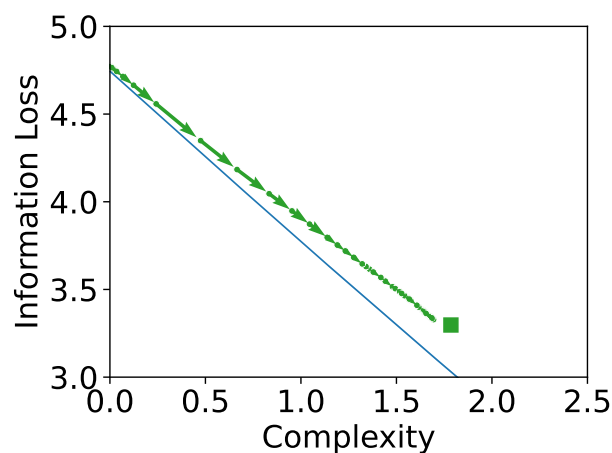

(b) Communicative Space

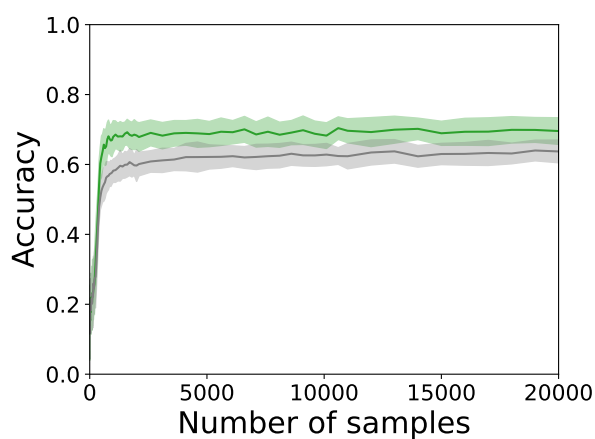

(c) Accuracy

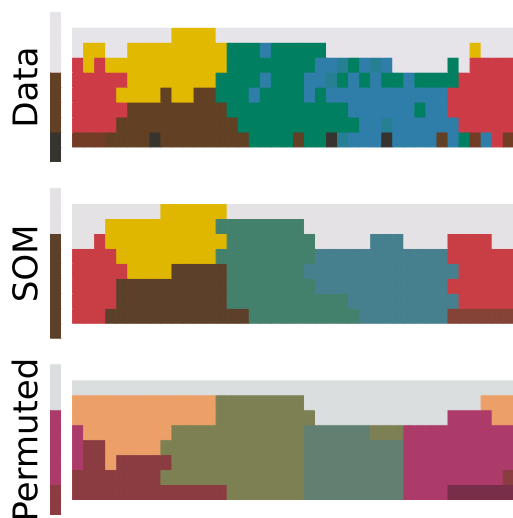

(d) Mode Maps

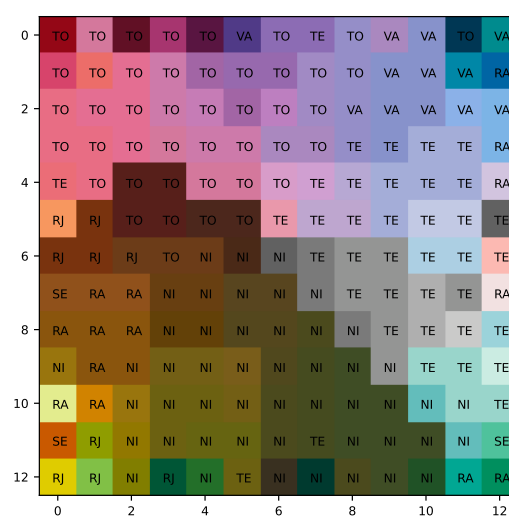

(e) Learnt SOM Cells

### 1.40. Guambiano; $|\mathcal{W}| = 9$

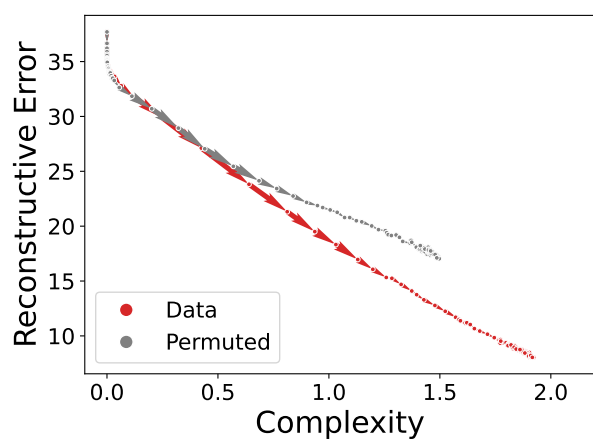

(a) Learning Space

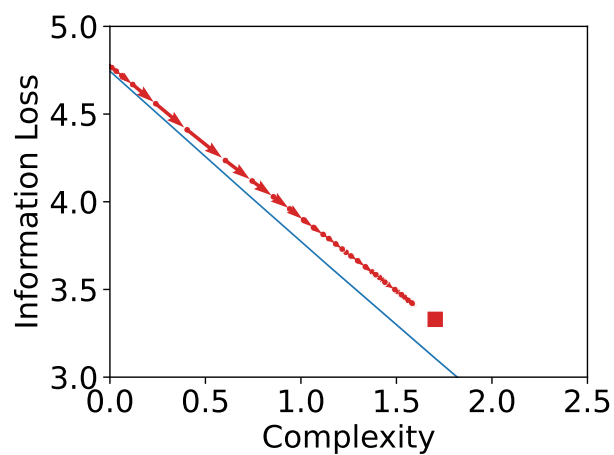

(b) Communicative Space

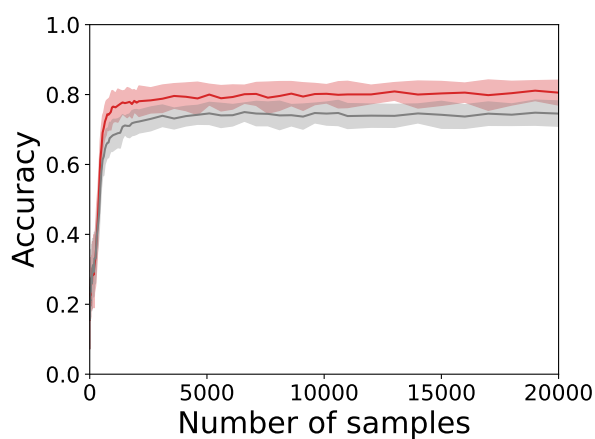

(c) Accuracy

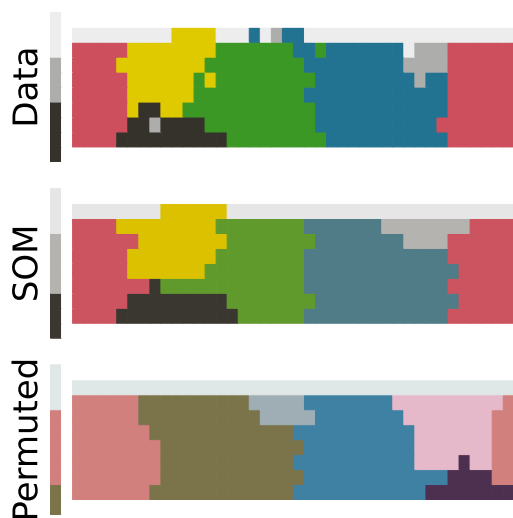

(d) Mode Maps

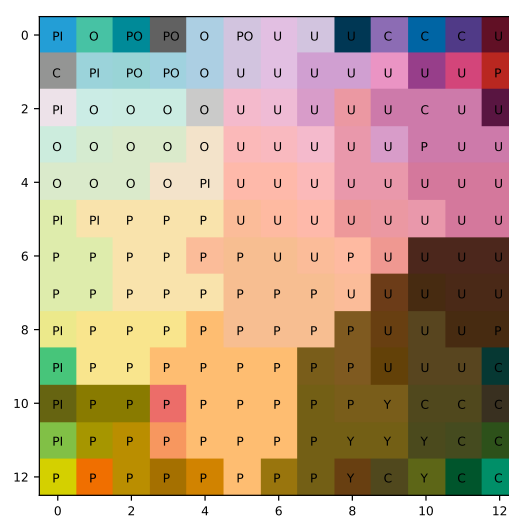

(e) Learnt SOM Cells

1.41. Guarijio;  $|\mathcal{W}| = 13$

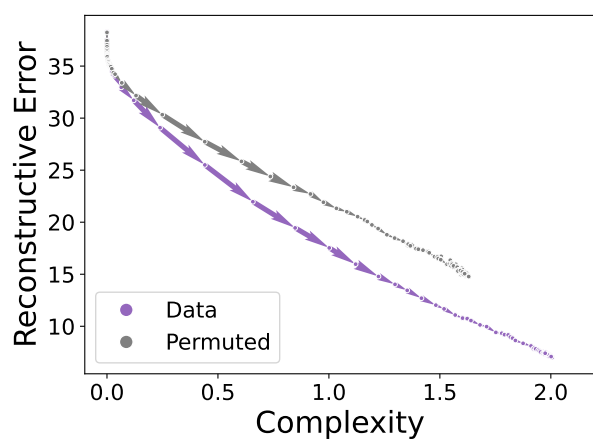

(a) Learning Space

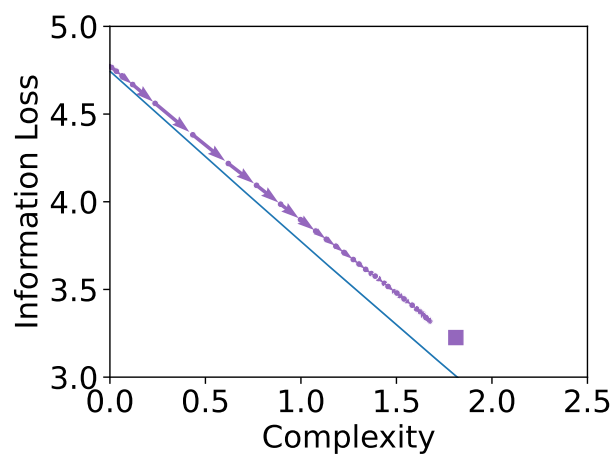

(b) Communicative Space

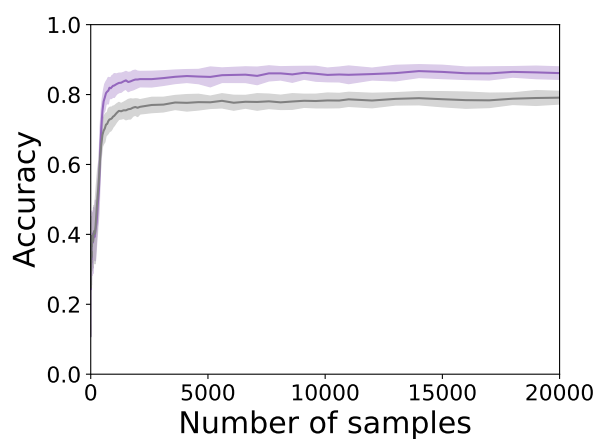

(c) Accuracy

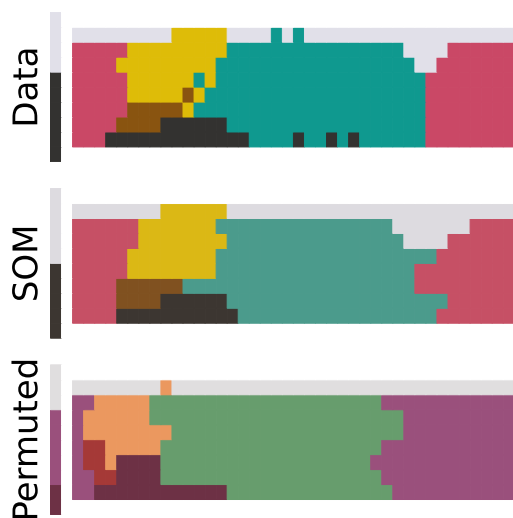

(d) Mode Maps

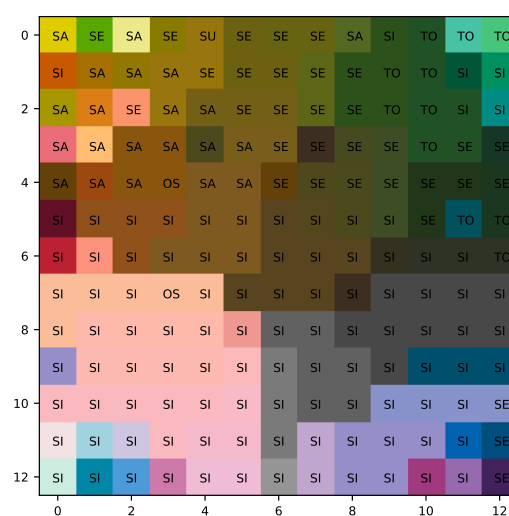

(e) Learnt SOM Cells

1.42. Ngäbere;  $|\mathcal{W}| = 30$

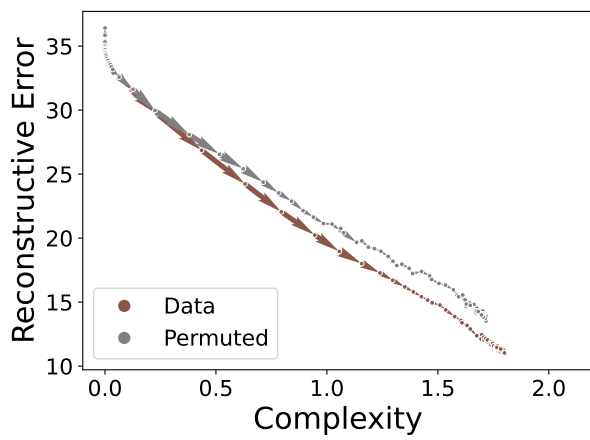

(a) Learning Space

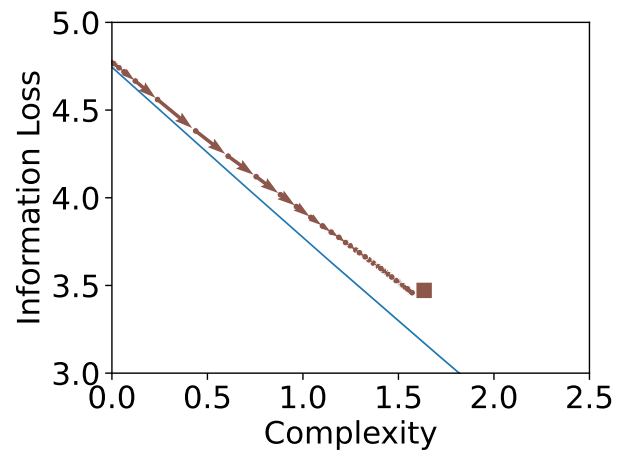

(b) Communicative Space

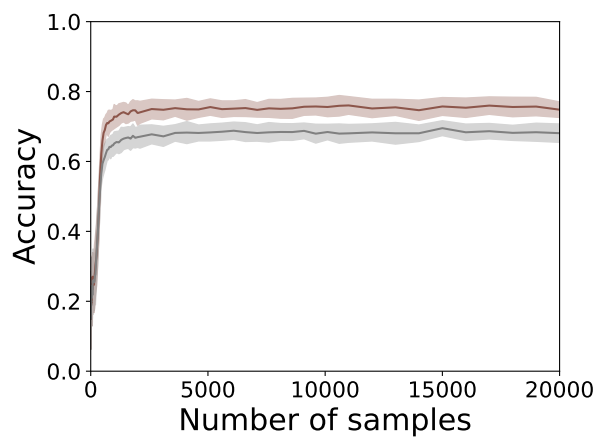

(c) Accuracy

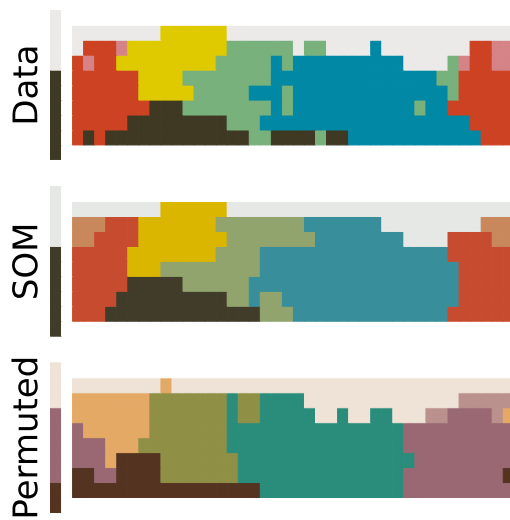

(d) Mode Maps

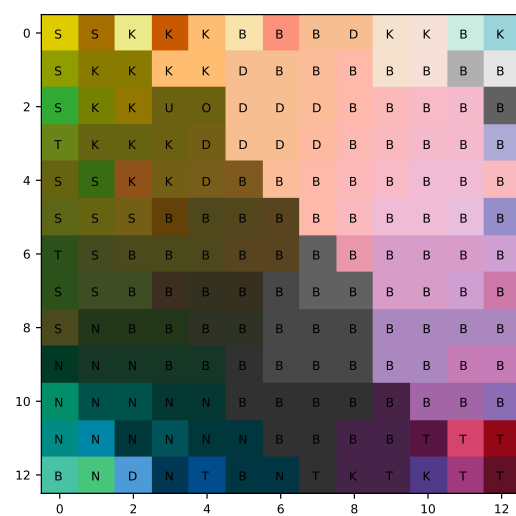

(e) Learnt SOM Cells

### 1.43. *Gunu*; $|\mathcal{W}| = 27$

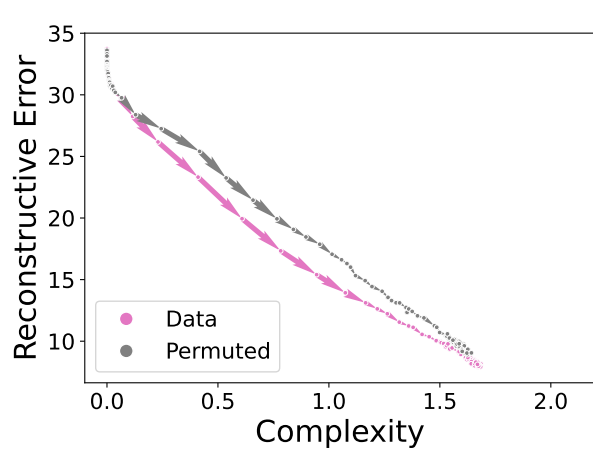

(a) Learning Space

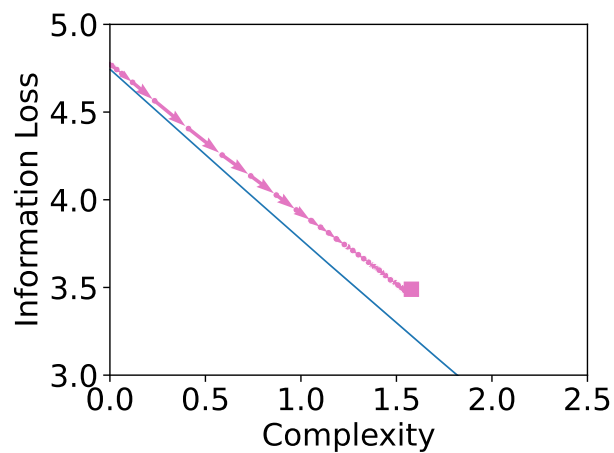

(b) Communicative Space

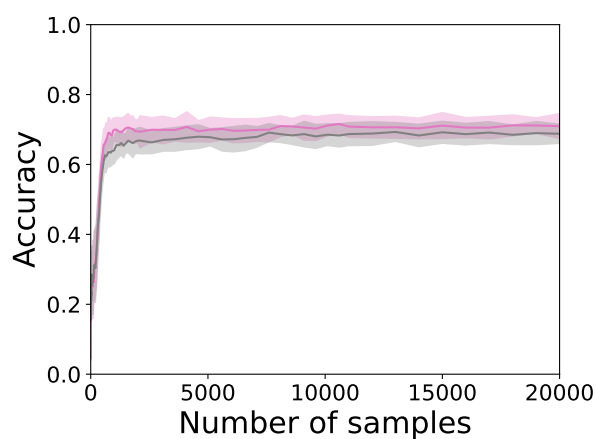

(c) Accuracy

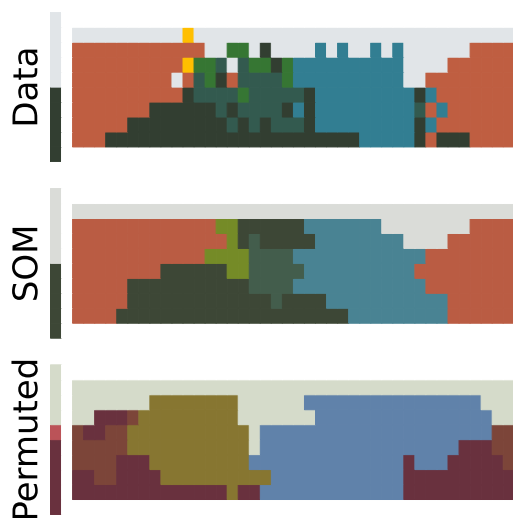

(d) Mode Maps

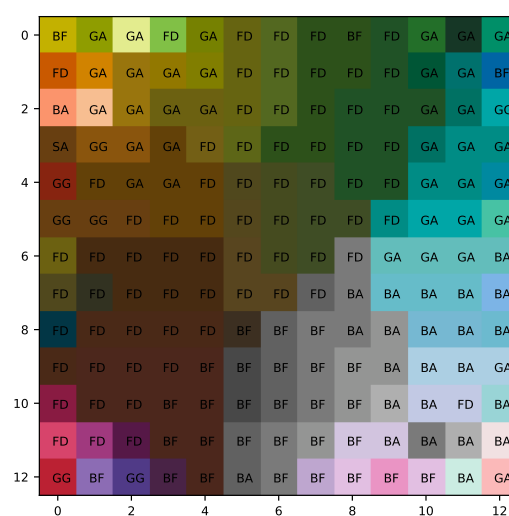

(e) Learnt SOM Cells



1.44. Halbi;  $|\mathcal{W}| = 70$

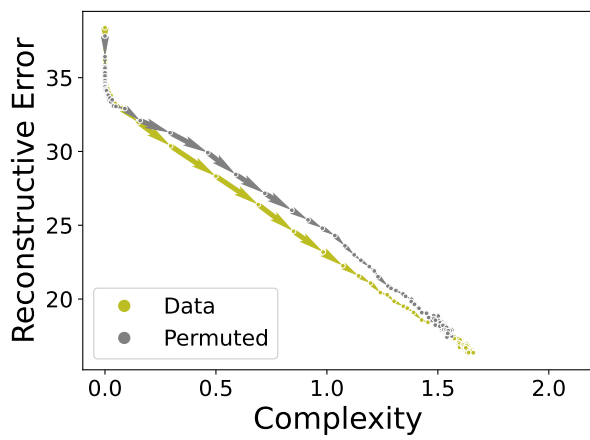

### (a) Learning Space

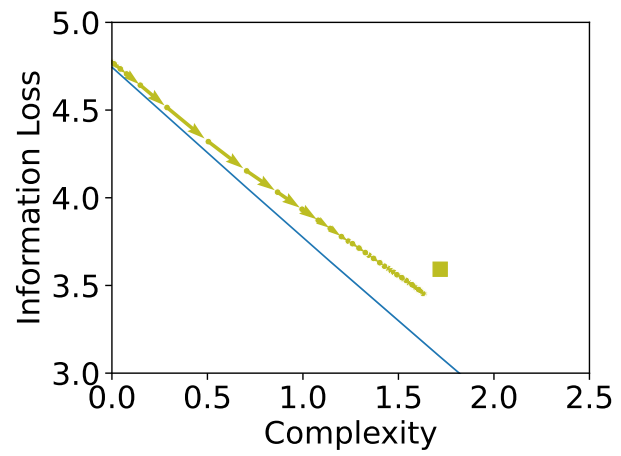

### (b) Communicative Space

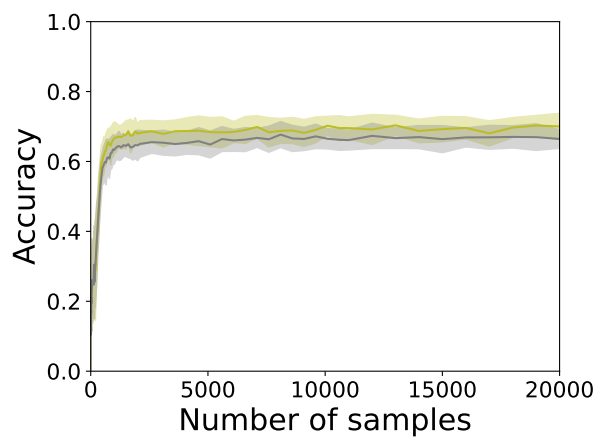

(c) Accuracy

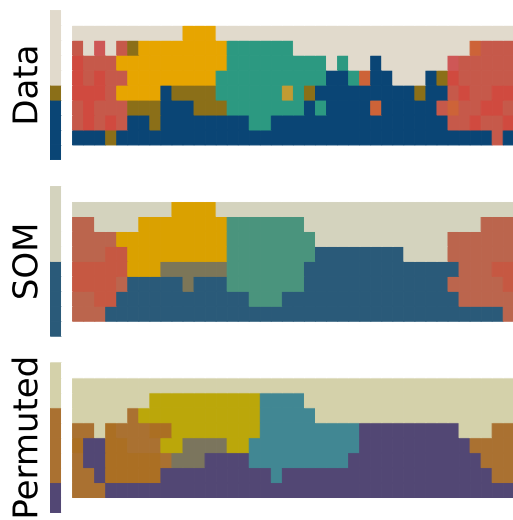

**(d) Mode Maps**

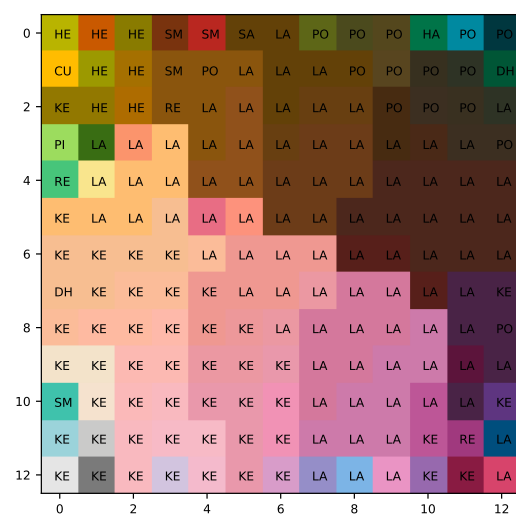

(e) Learnt SOM Cells

1.45. Huasteco;  $|\mathcal{W}| = 13$

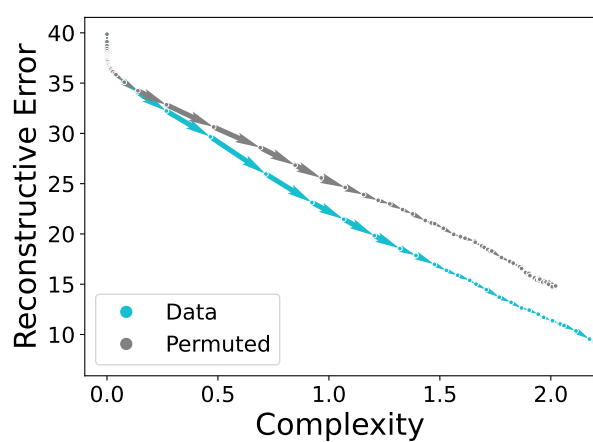

(a) Learning Space

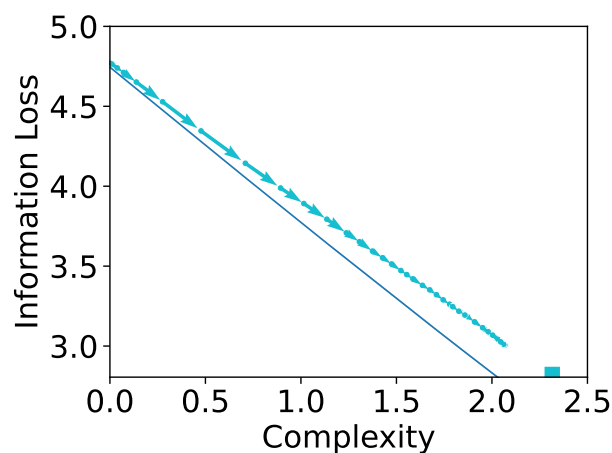

(b) Communicative Space

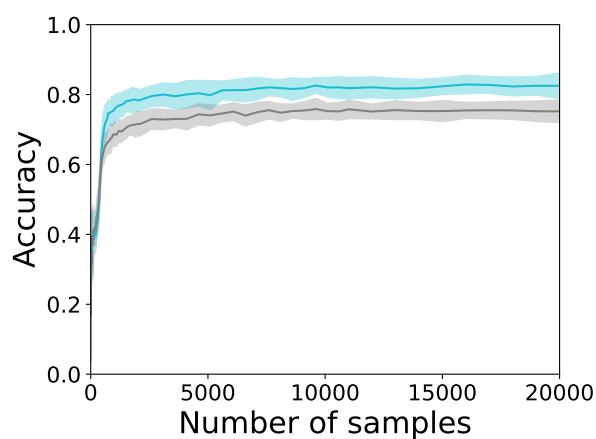

(c) Accuracy

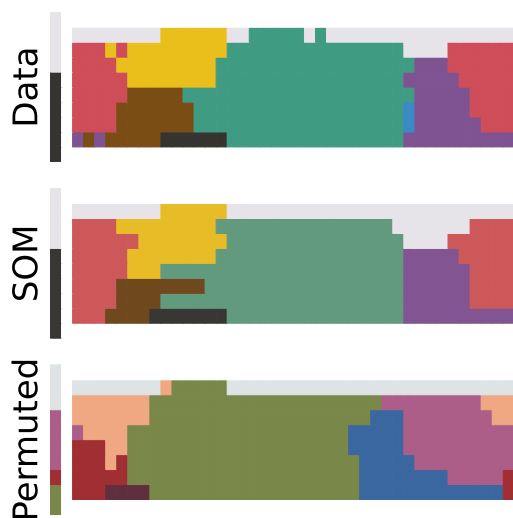

(d) Mode Maps

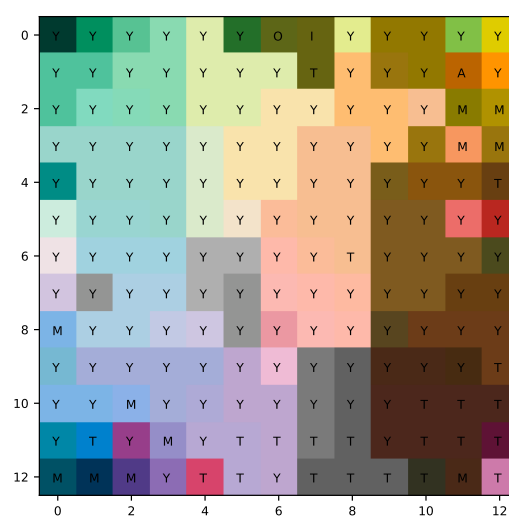

(e) Learnt SOM Cells

# 1.46. Huave; $|\mathcal{W}| = 17$

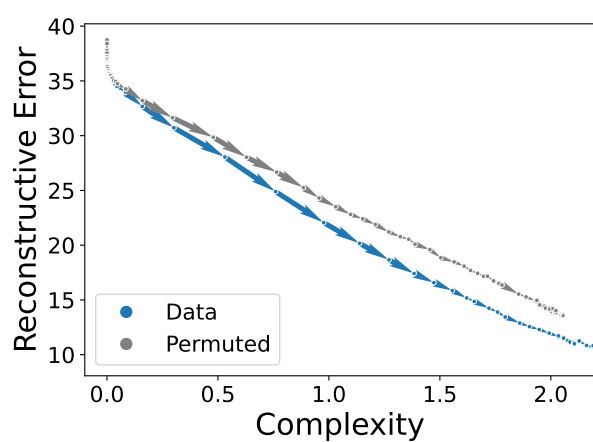

(a) Learning Space

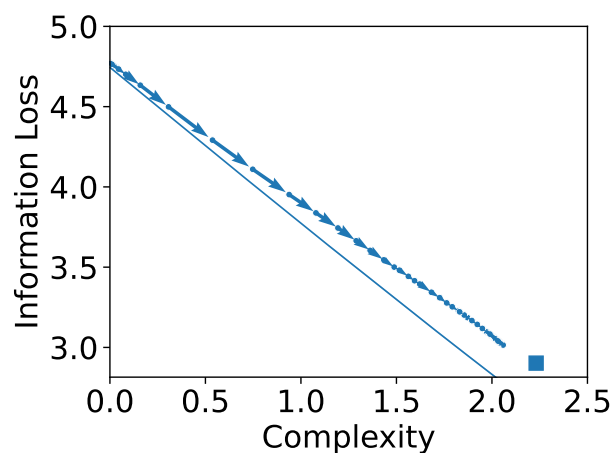

(b) Communicative Space

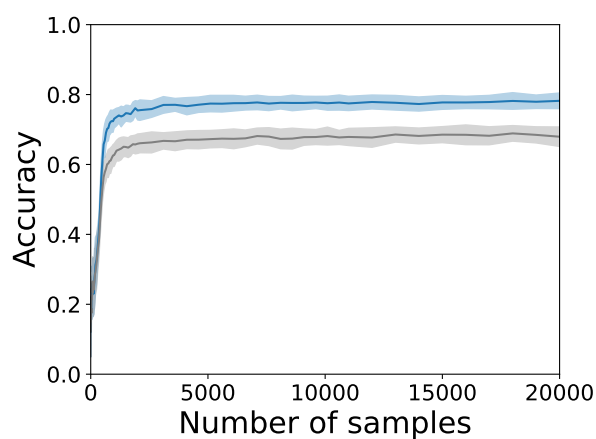

(c) Accuracy

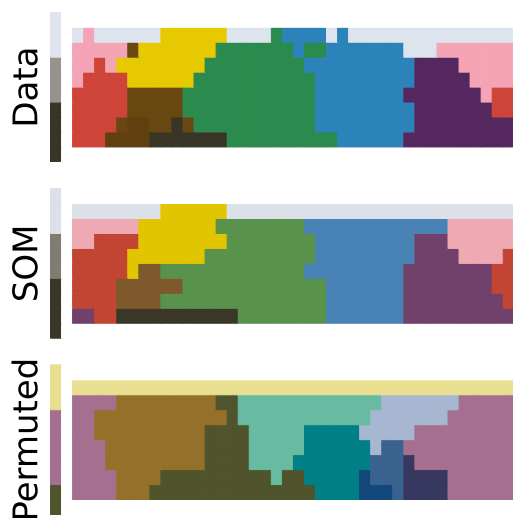

(d) Mode Maps

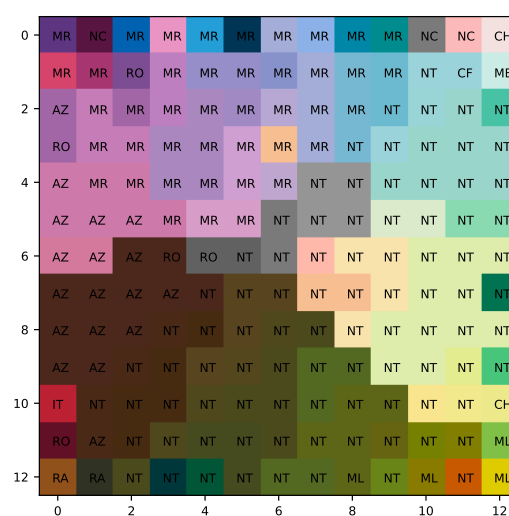

(e) Learnt SOM Cells

1.47. *Iduna*;  $|\mathcal{W}| = 51$

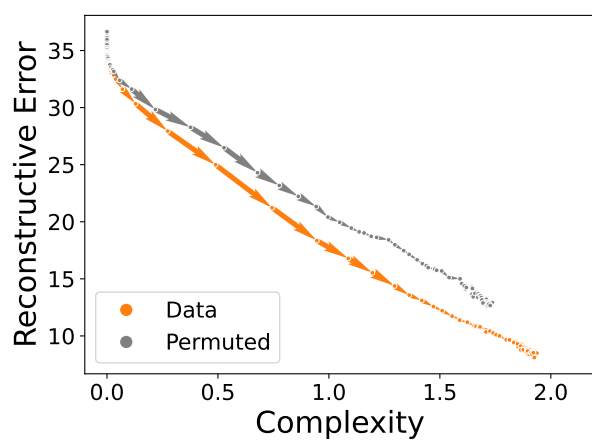

(a) Learning Space

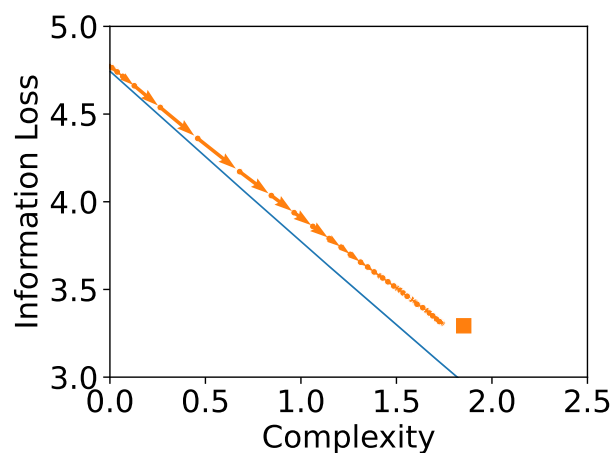

(b) Communicative Space

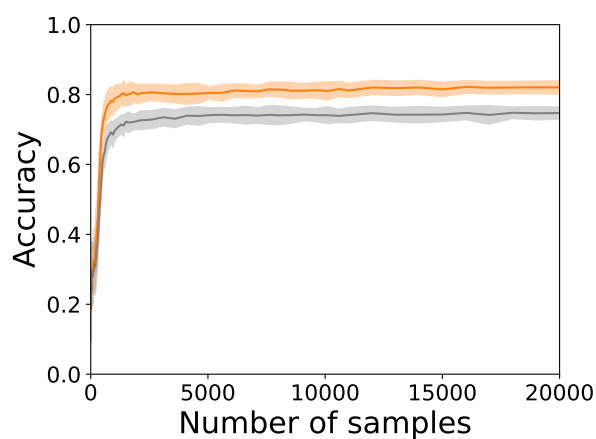

(c) Accuracy

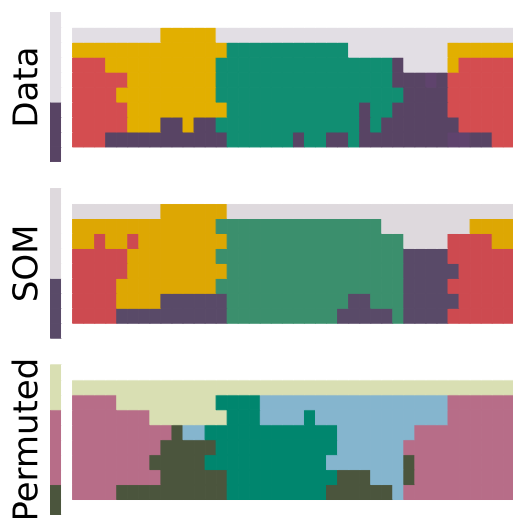

(d) Mode Maps

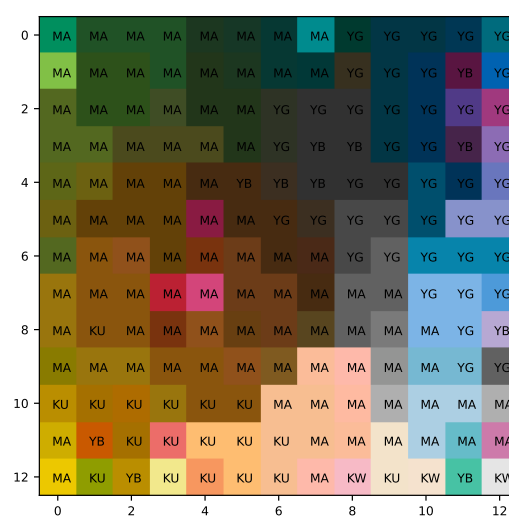

(e) Learnt SOM Cells

1.48. *Ifugao*;  $|\mathcal{W}| = 23$

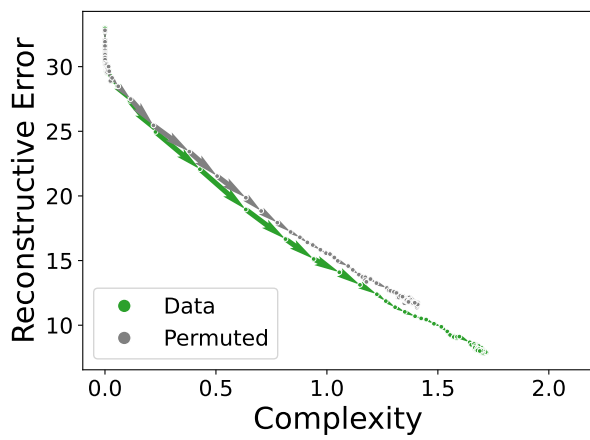

(a) Learning Space

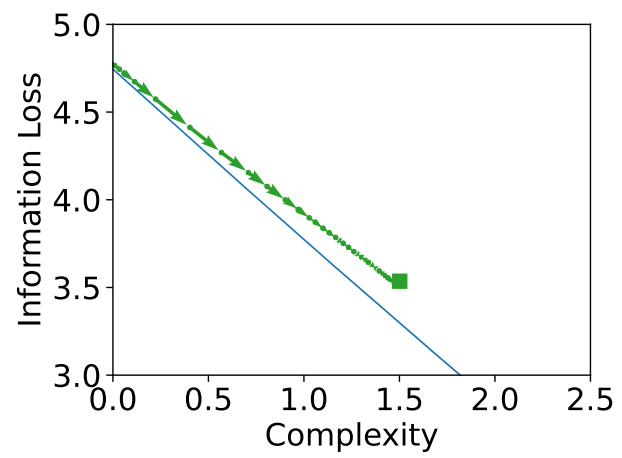

(b) Communicative Space

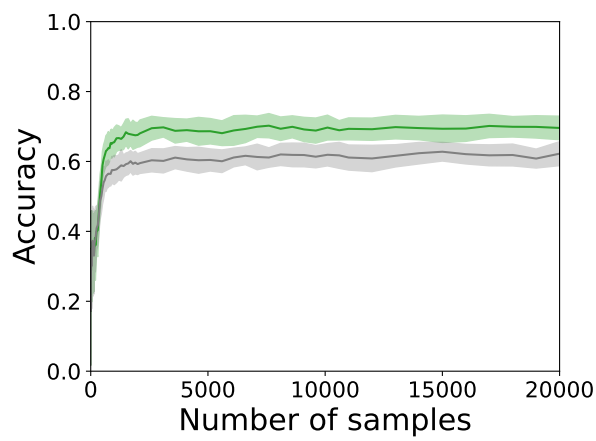

(c) Accuracy

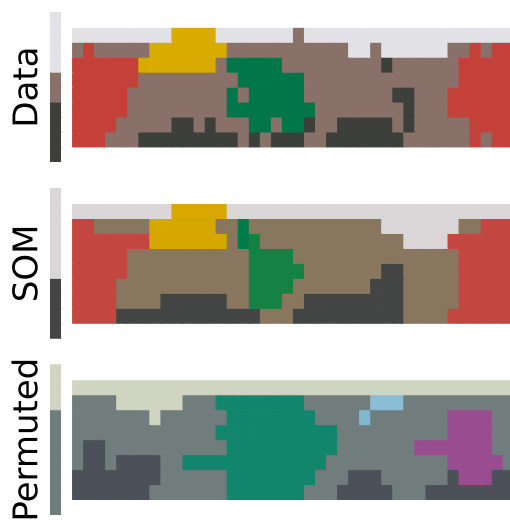

(d) Mode Maps

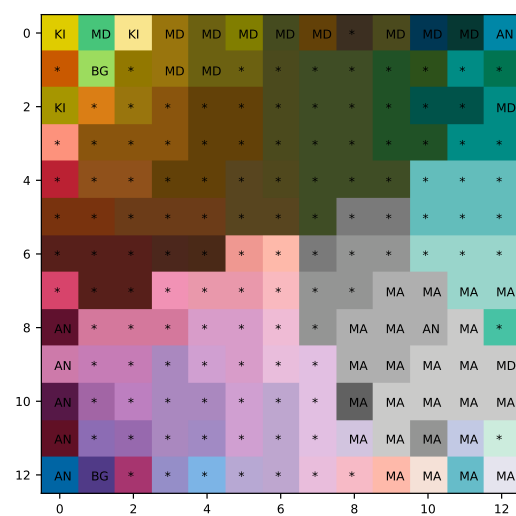

(e) Learnt SOM Cells

1.49. *Sepik Iwam*;  $|\mathcal{W}| = 11$

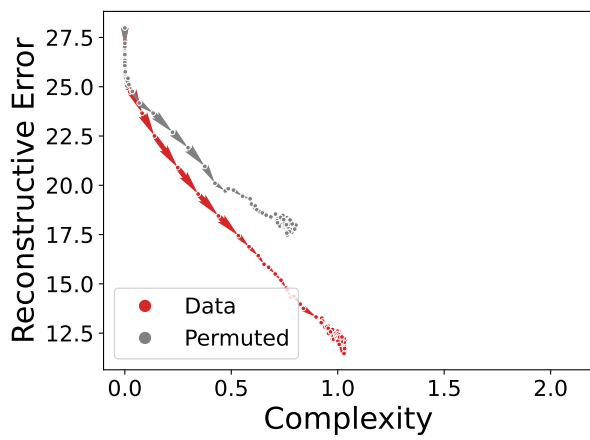

### (a) Learning Space

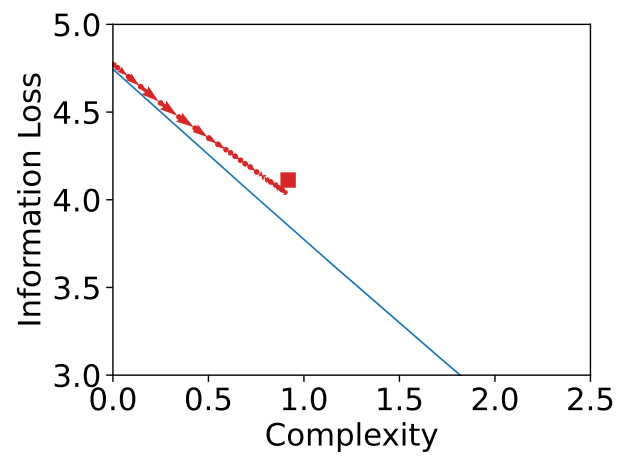

### (b) Communicative Space

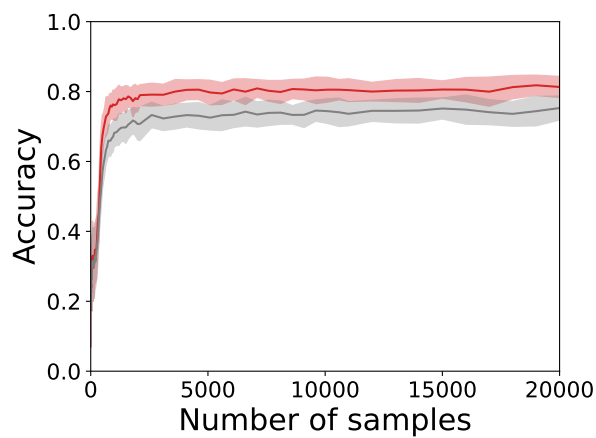

(c) Accuracy

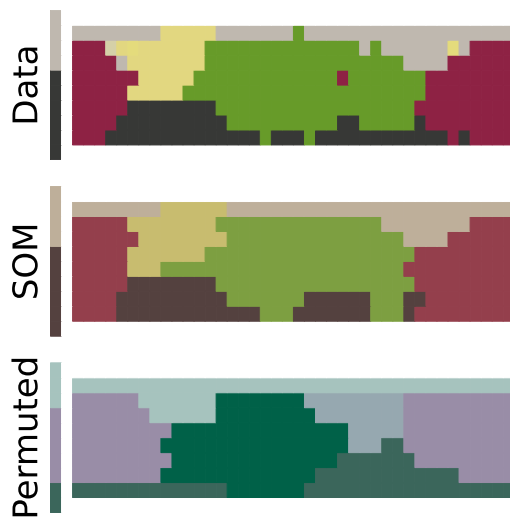

(d) Mode Maps

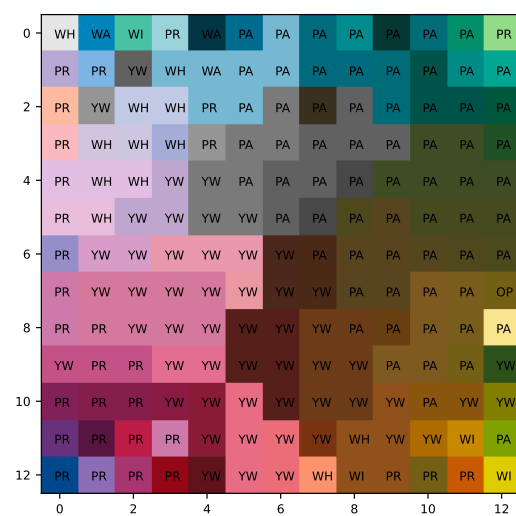

(e) Learnt SOM Cells

1.50. Jicaque;  $|\mathcal{W}| = 10$

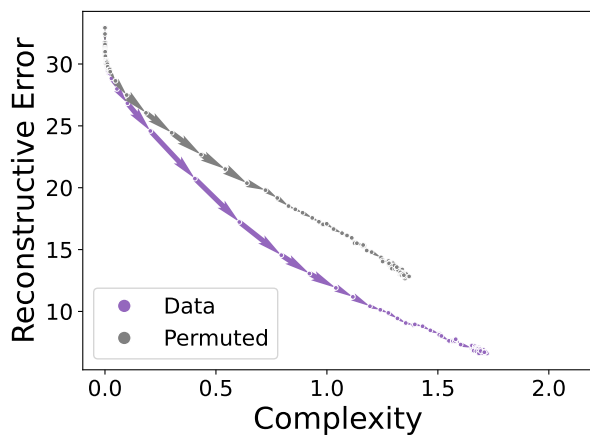

(a) Learning Space

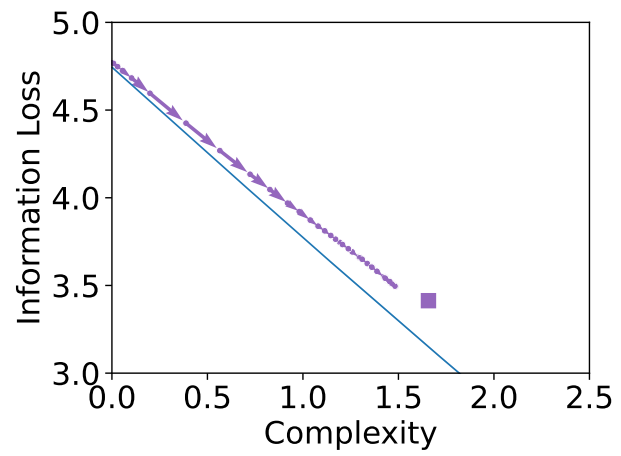

(b) Communicative Space

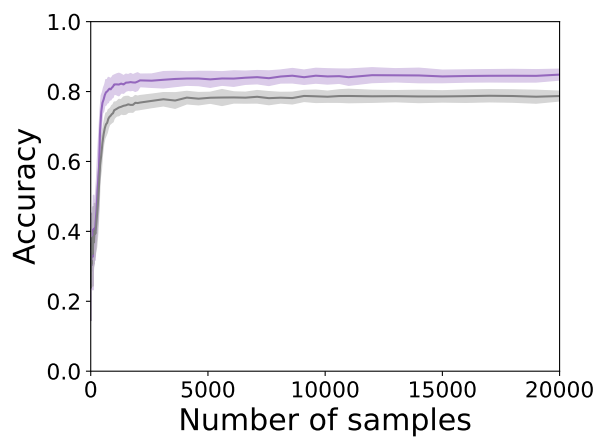

(c) Accuracy

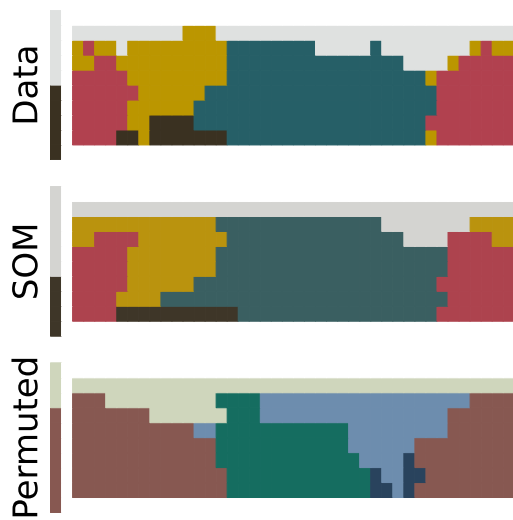

(d) Mode Maps

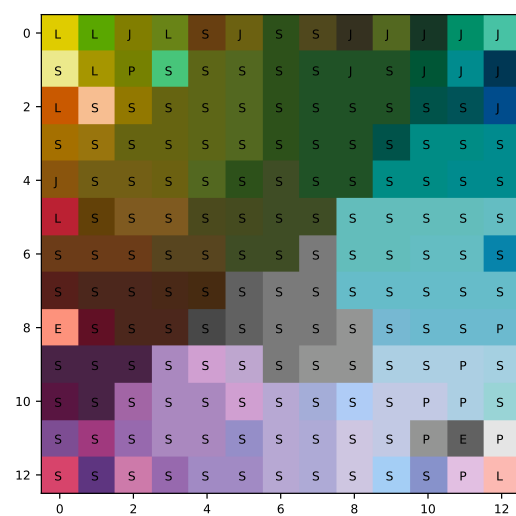

(e) Learnt SOM Cells

1.51. Kalam;  $|\mathcal{W}| = 67$

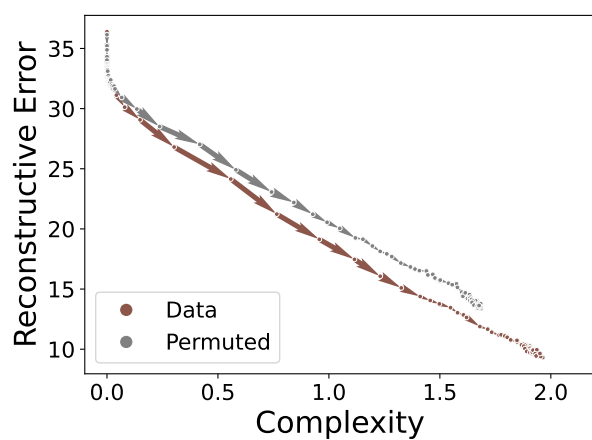

(a) Learning Space

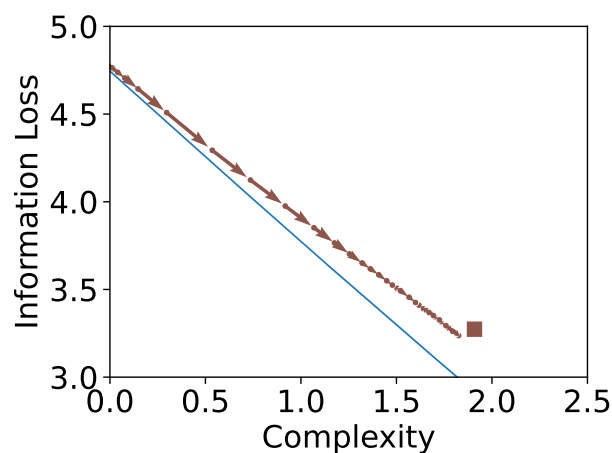

(b) Communicative Space

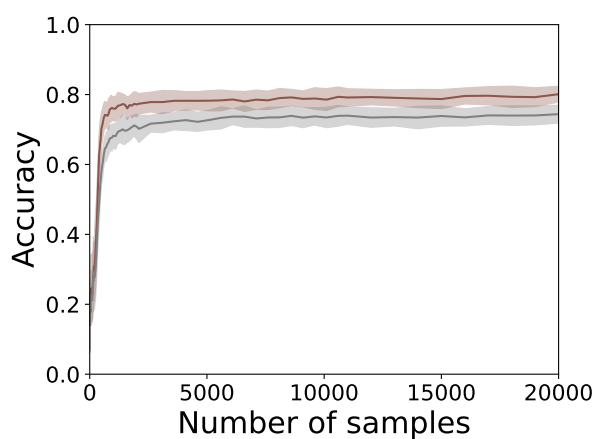

(c) Accuracy

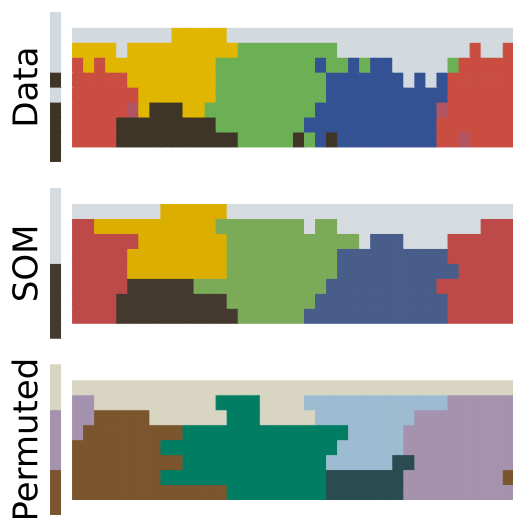

(d) Mode Maps

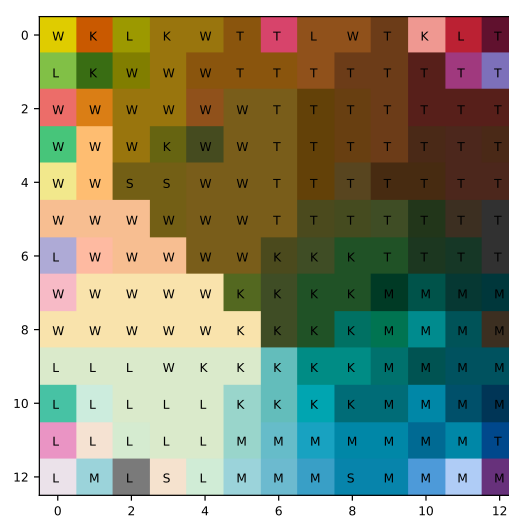

(e) Learnt SOM Cells



### 1.52. Kamano-Kafe; $|\mathcal{W}| = 33$

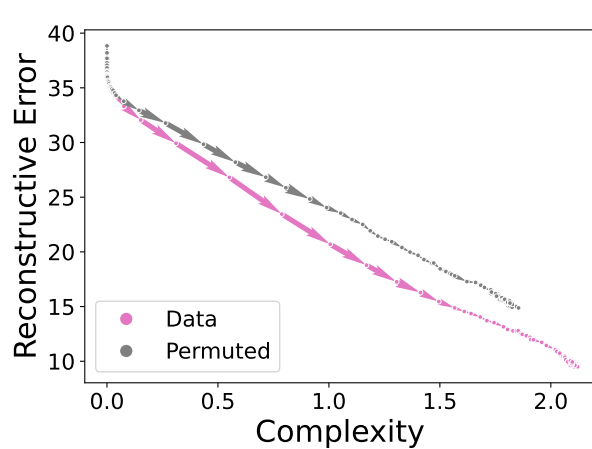

(a) Learning Space

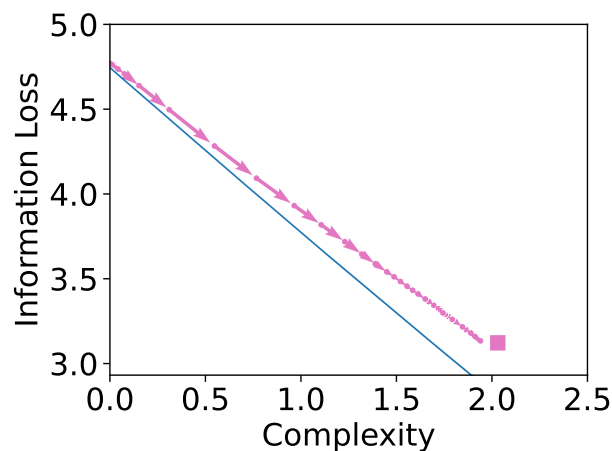

(b) Communicative Space

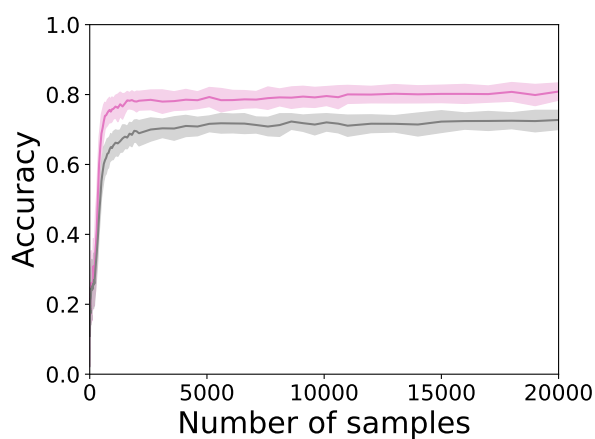

(c) Accuracy

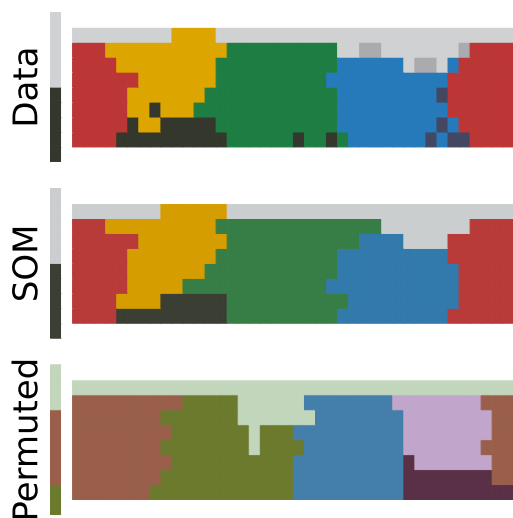

(d) Mode Maps

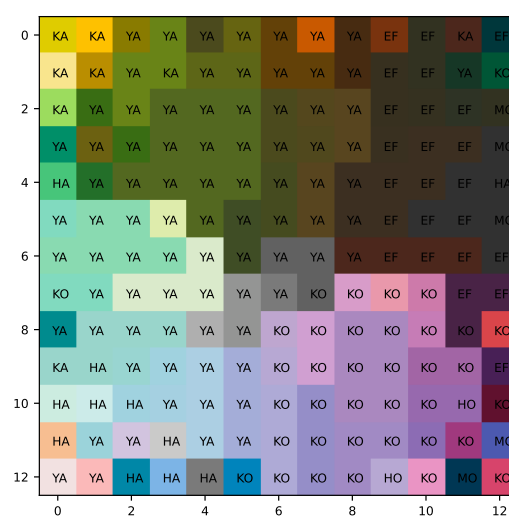

(e) Learnt SOM Cells

1.53. Karaja;  $|\mathcal{W}| = 10$

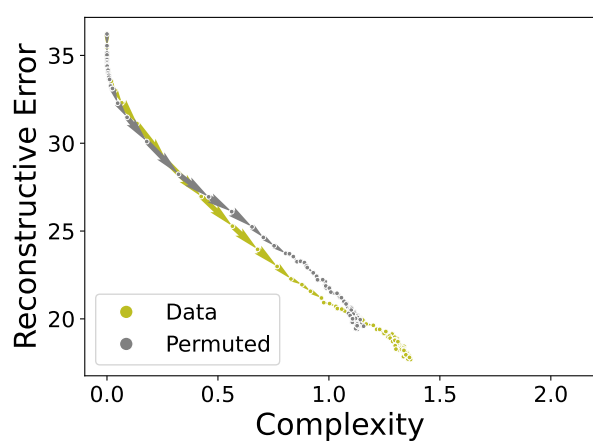

(a) Learning Space

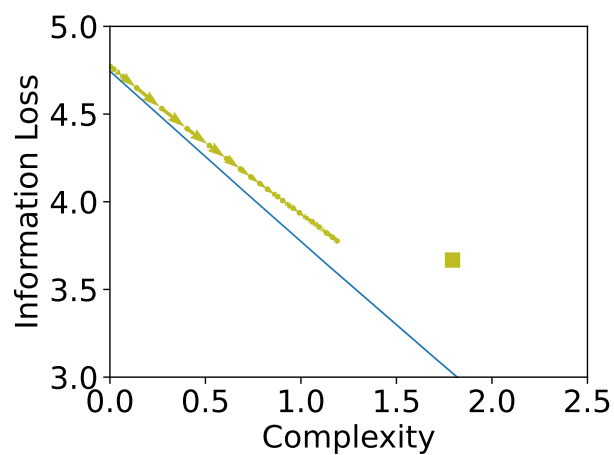

(b) Communicative Space

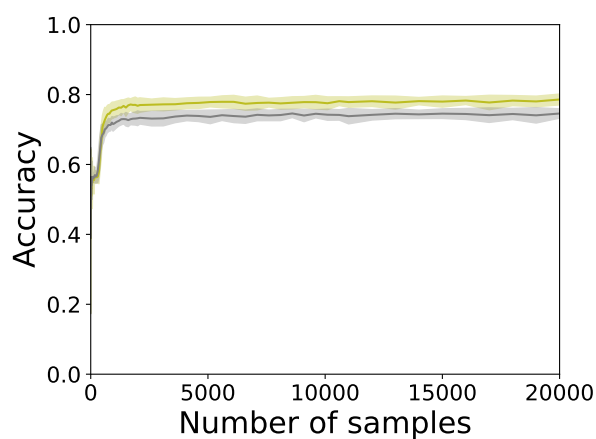

(c) Accuracy

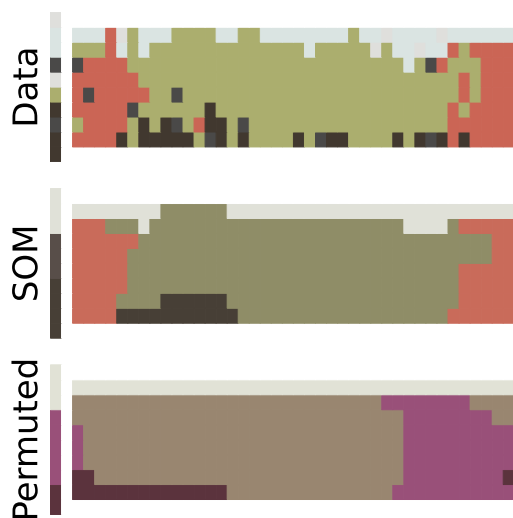

(d) Mode Maps

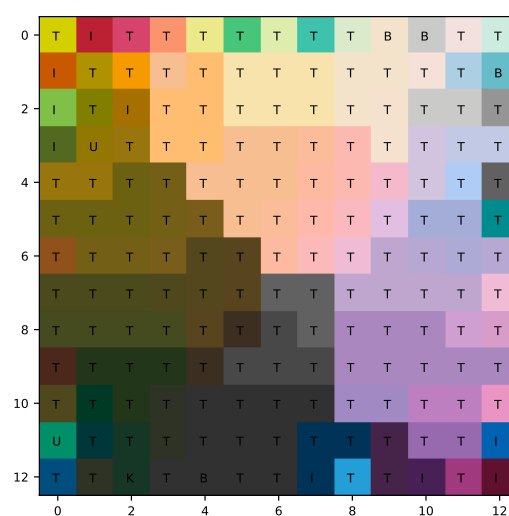

(e) Learnt SOM Cells

### 1.54. Kemtuik; $|\mathcal{W}| = 25$

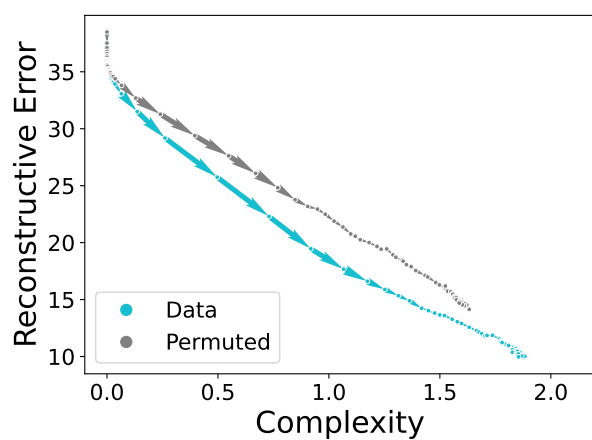

(a) Learning Space

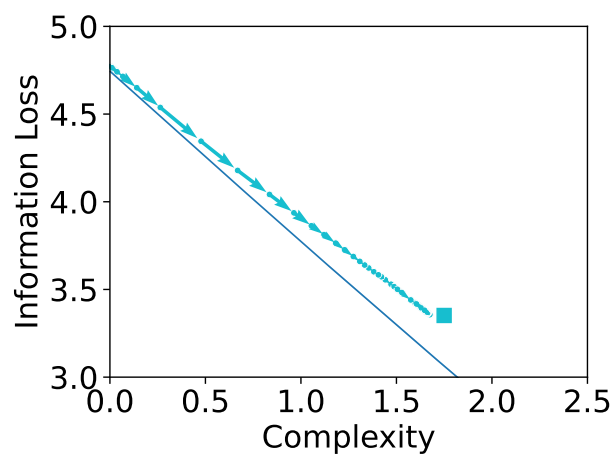

(b) Communicative Space

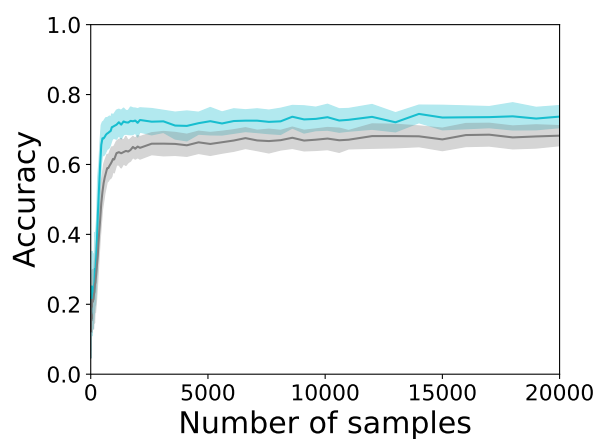

(c) Accuracy

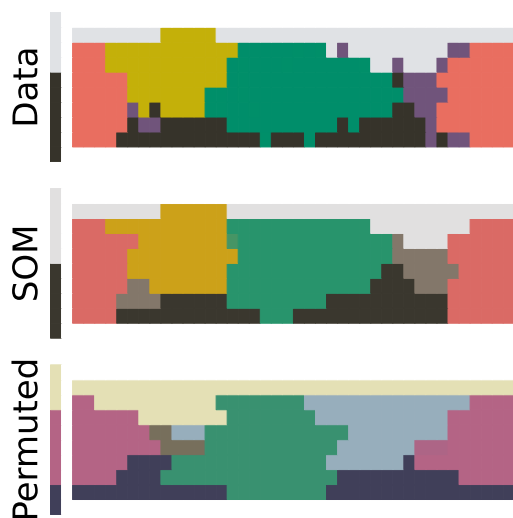

(d) Mode Maps

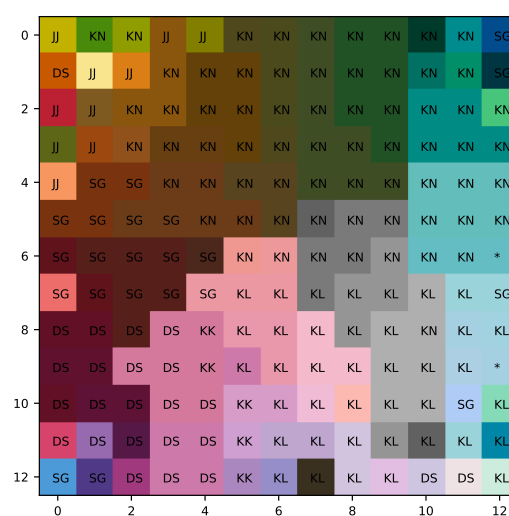

(e) Learnt SOM Cells

1.55. Kokoni;  $|\mathcal{W}| = 11$

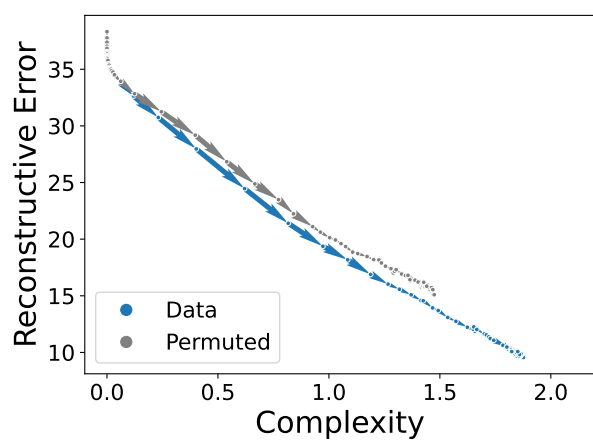

(a) Learning Space

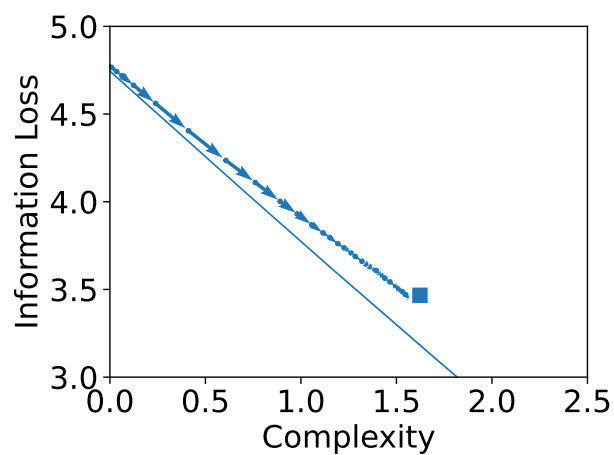

(b) Communicative Space

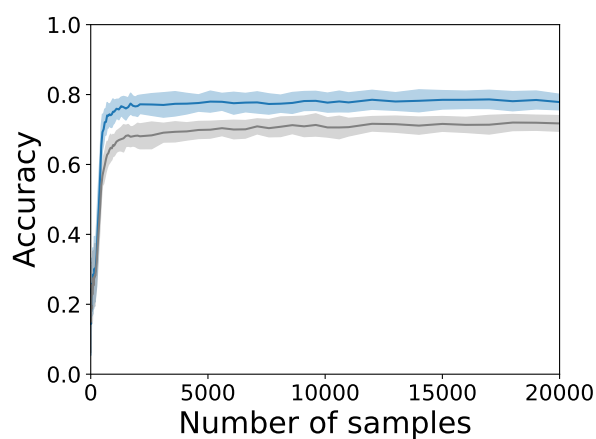

(c) Accuracy

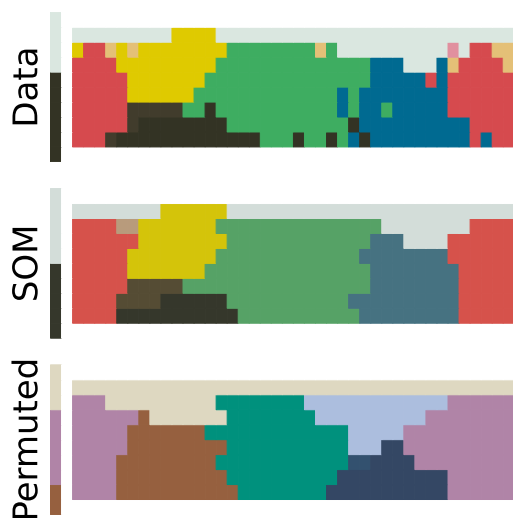

(d) Mode Maps

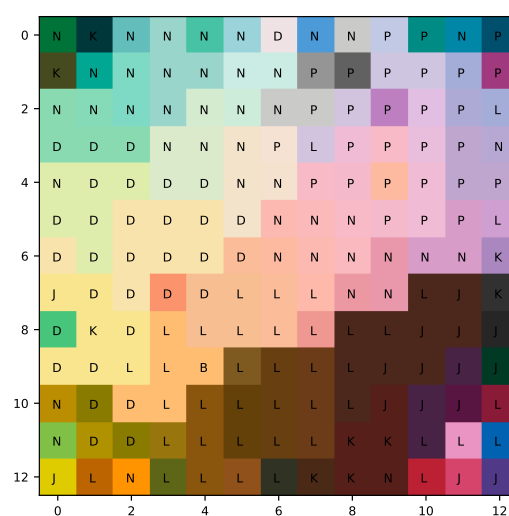

(e) Learnt SOM Cells

1.56. Konkomba;  $|\mathcal{W}| = 21$

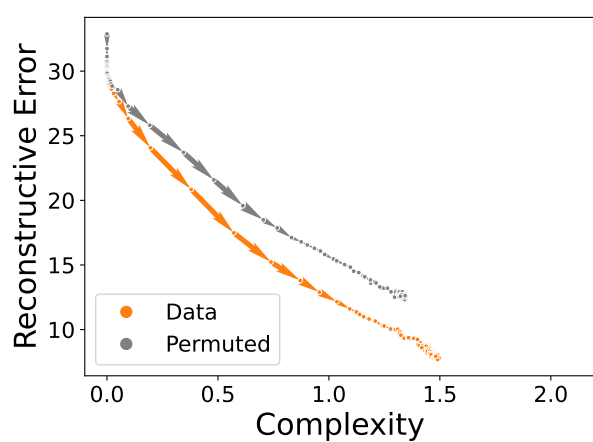

(a) Learning Space

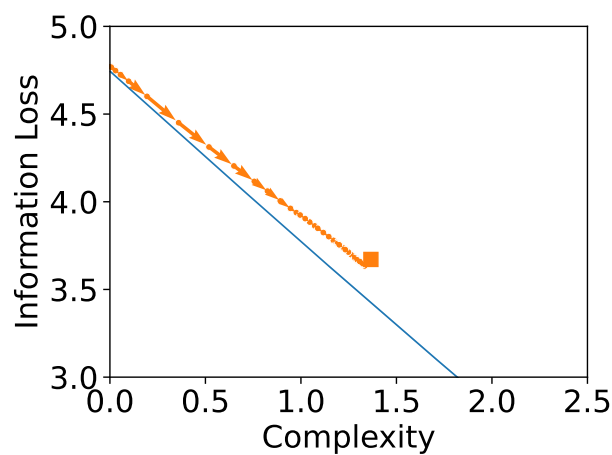

(b) Communicative Space

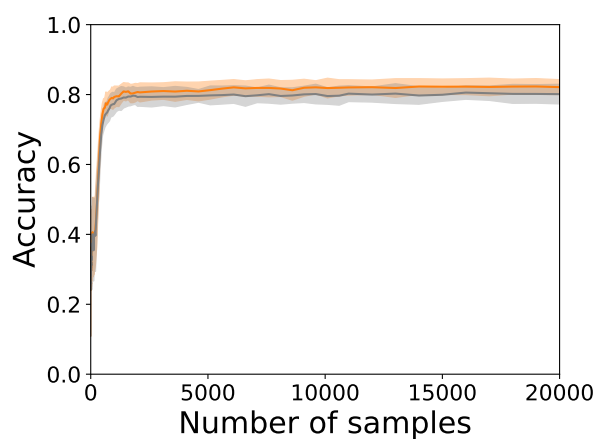

(c) Accuracy

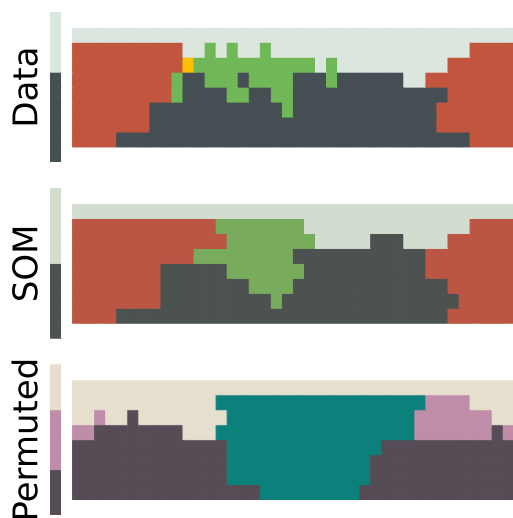

(d) Mode Maps

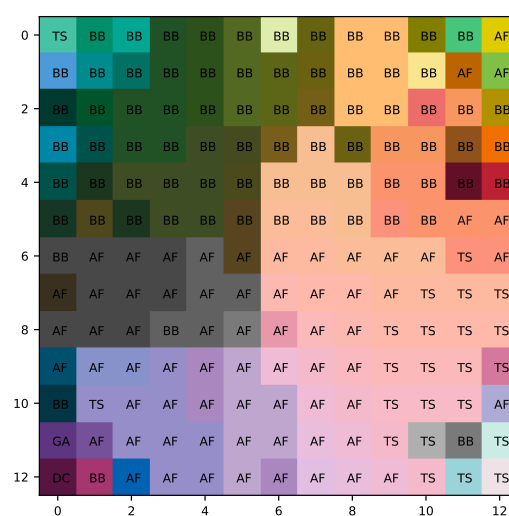

(e) Learnt SOM Cells

1.57. Kriol;  $|\mathcal{W}| = 25$

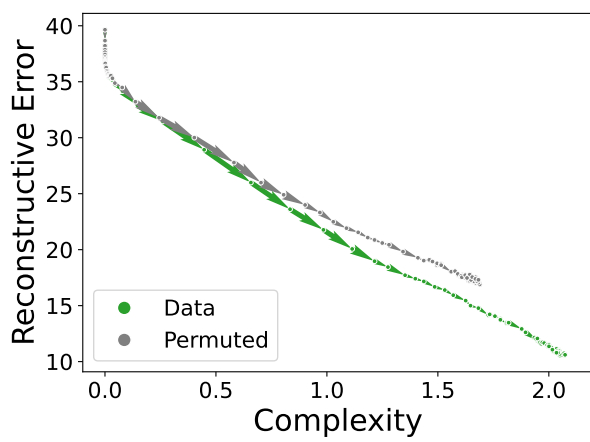

(a) Learning Space

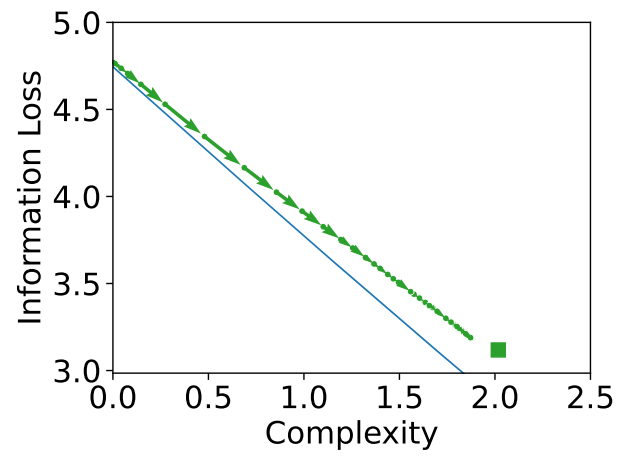

(b) Communicative Space

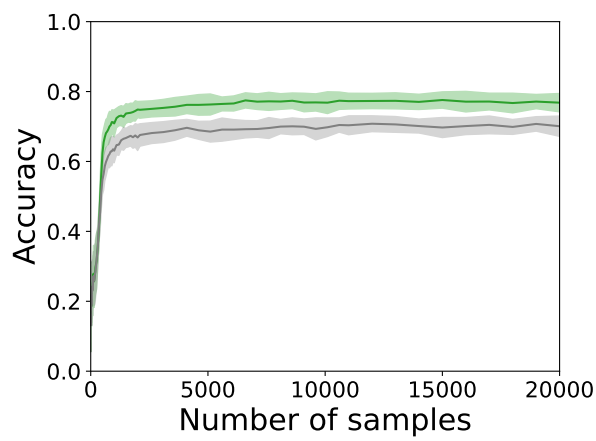

(c) Accuracy

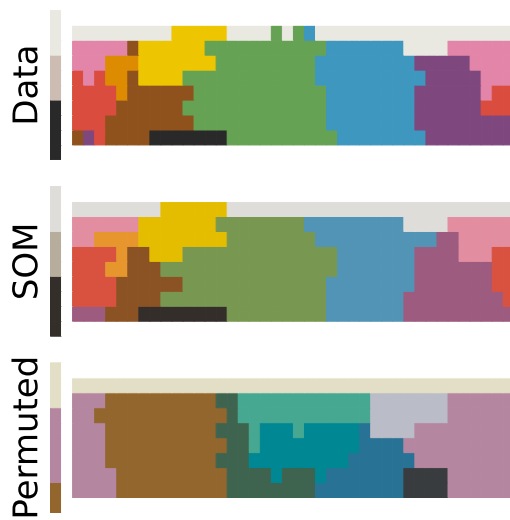

(d) Mode Maps

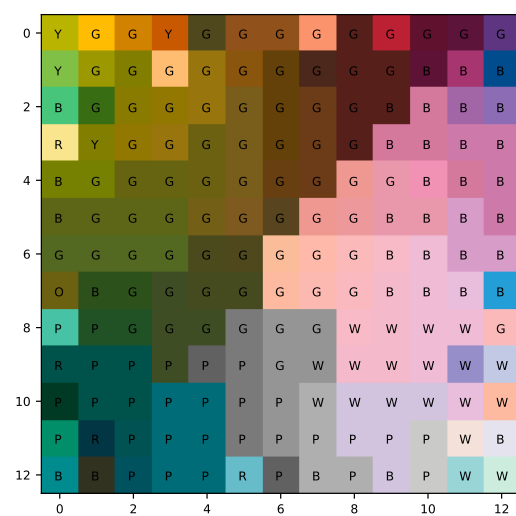

(e) Learnt SOM Cells

1.58. Kuku-Yalanji;  $|\mathcal{W}| = 17$

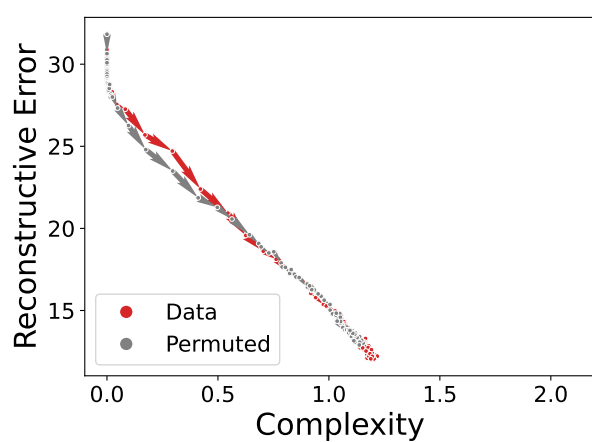

(a) Learning Space

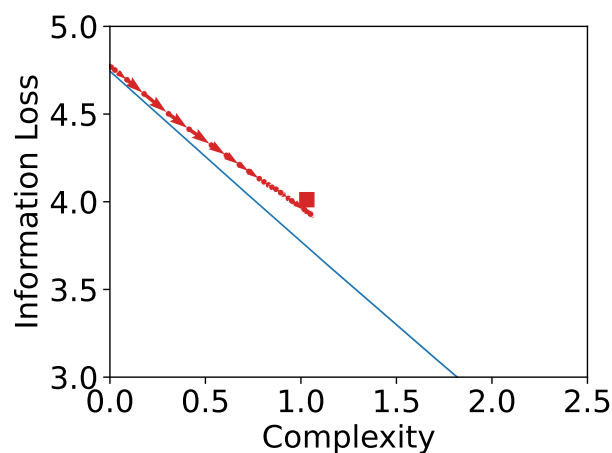

(b) Communicative Space

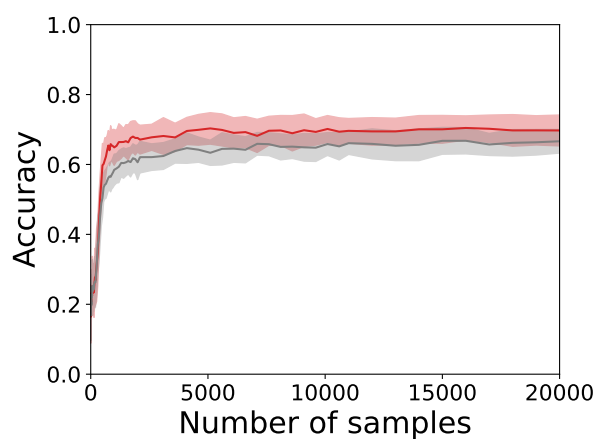

(c) Accuracy

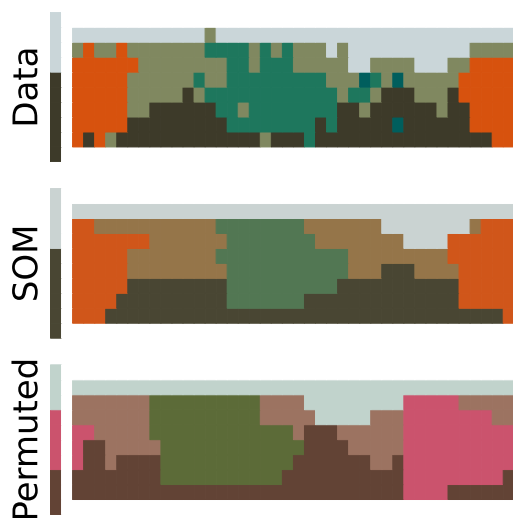

(d) Mode Maps

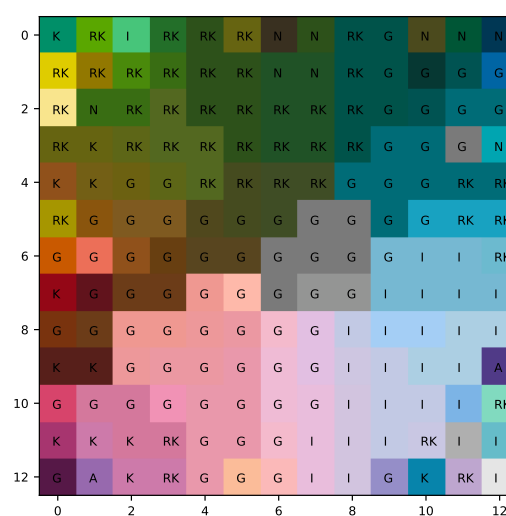

(e) Learnt SOM Cells

1.59. Long-haired Kuna;  $|\mathcal{W}| = 46$

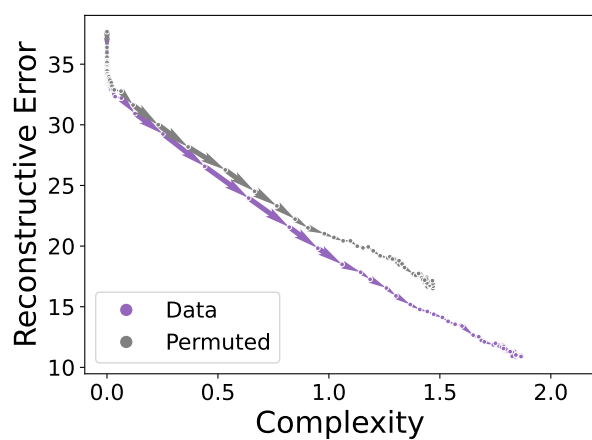

(a) Learning Space

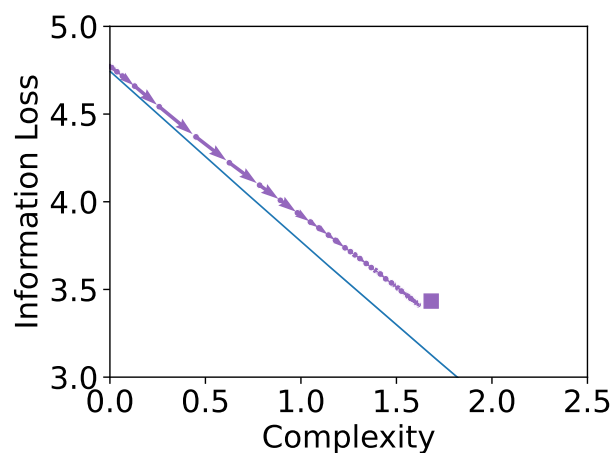

(b) Communicative Space

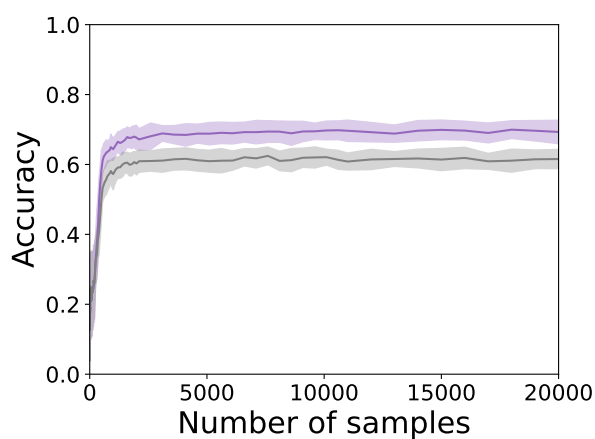

(c) Accuracy

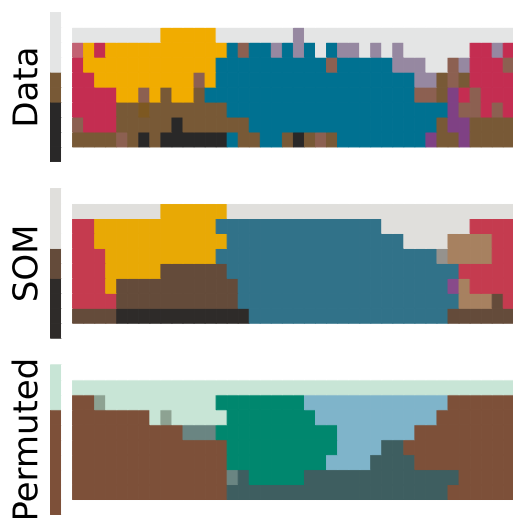

(d) Mode Maps

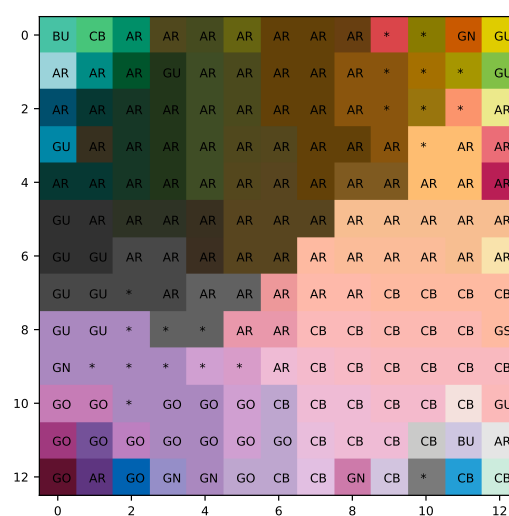

(e) Learnt SOM Cells



# 1.60. Kwerba; $|\mathcal{W}| = 22$

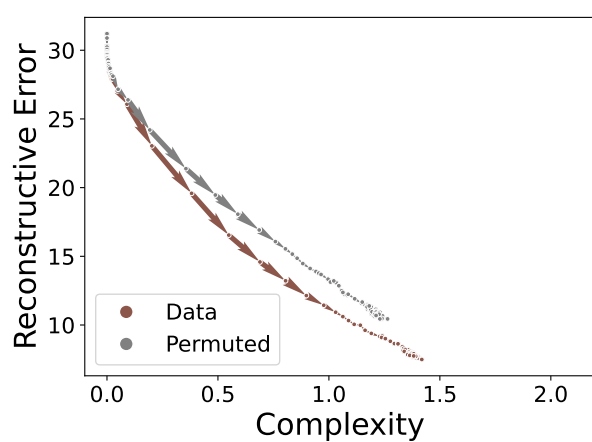

(a) Learning Space

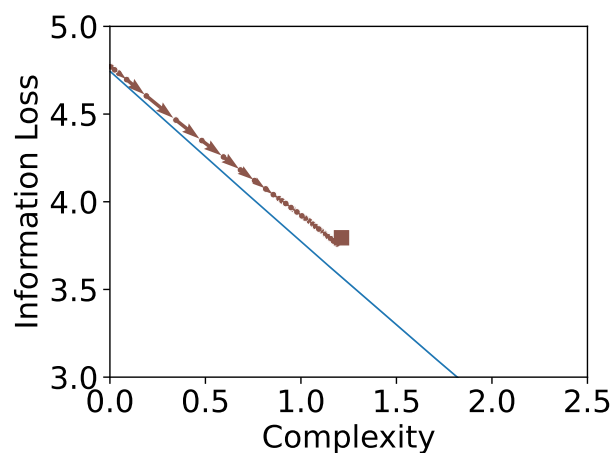

(b) Communicative Space

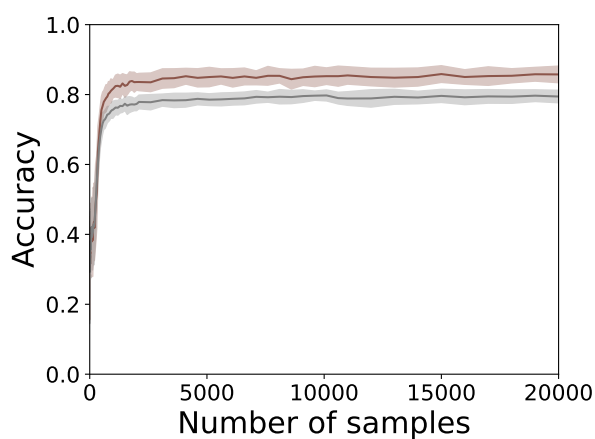

(c) Accuracy

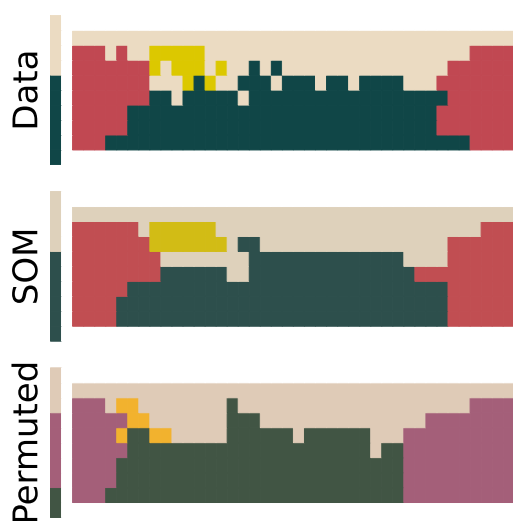

(d) Mode Maps

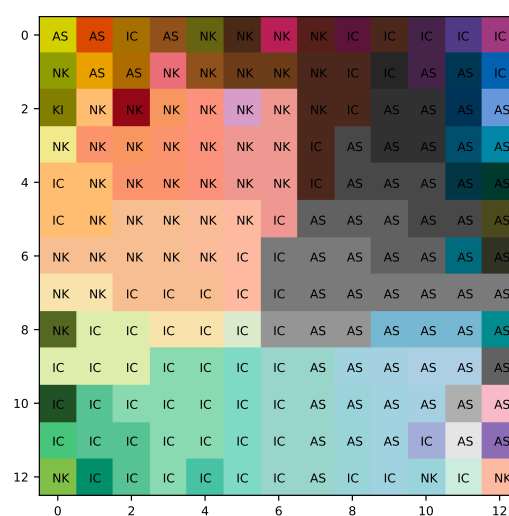

(e) Learnt SOM Cells

1.61. *Lele*;  $|\mathcal{W}| = 20$

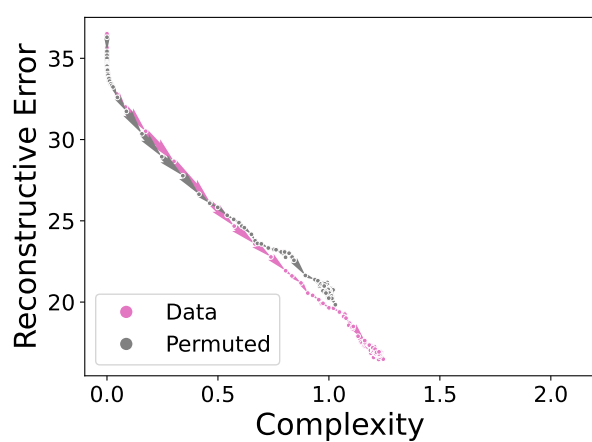

(a) Learning Space

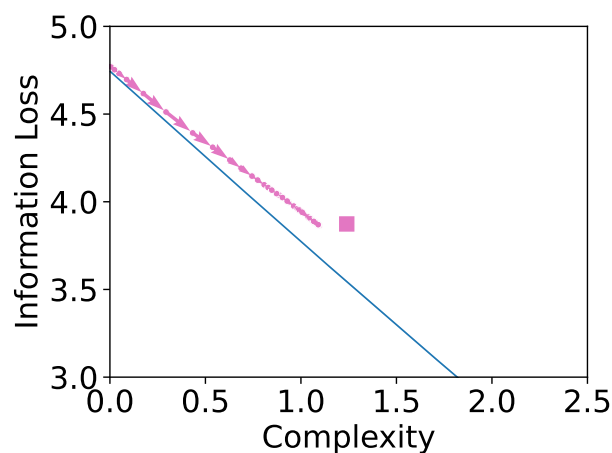

(b) Communicative Space

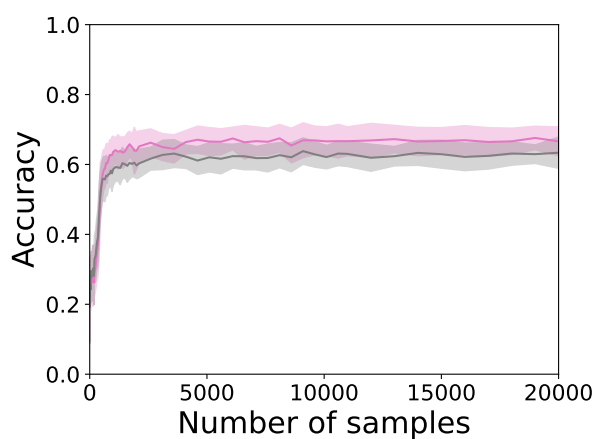

(c) Accuracy

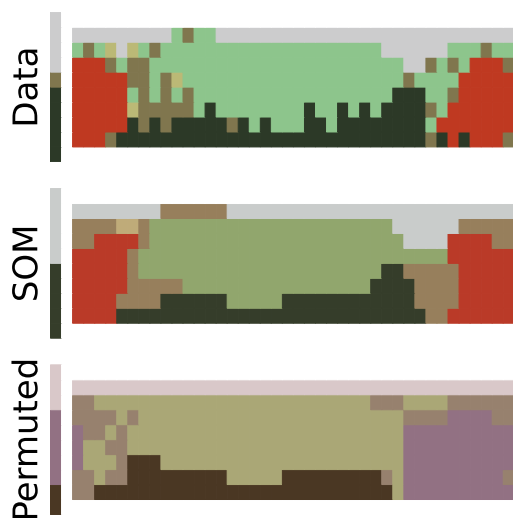

(d) Mode Maps

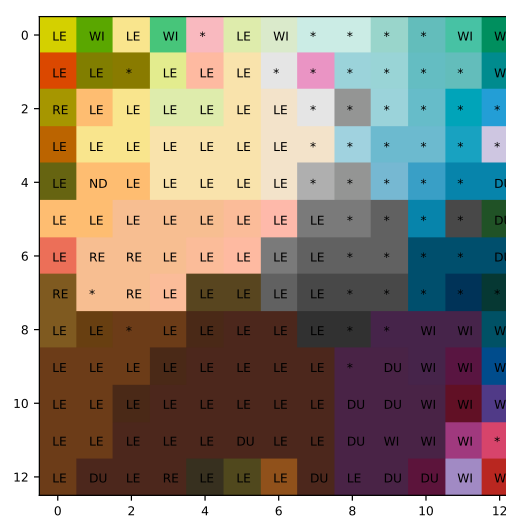

(e) Learnt SOM Cells

### 1.62. Mampruli; $|\mathcal{W}| = 80$

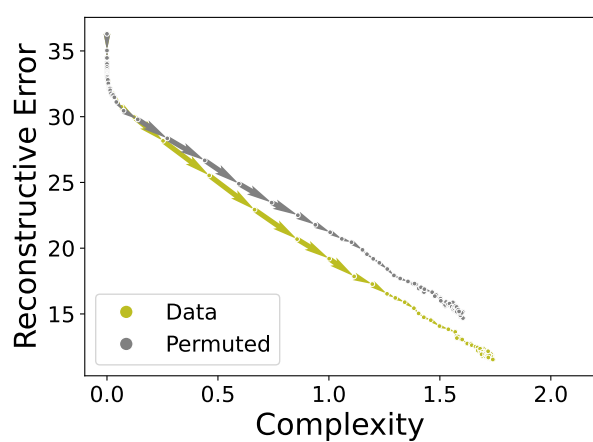

(a) Learning Space

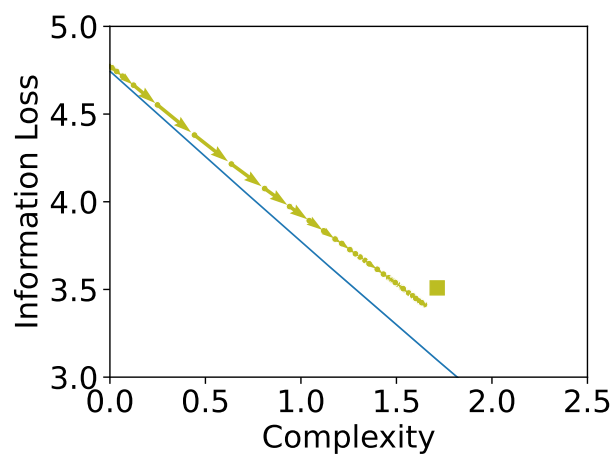

(b) Communicative Space

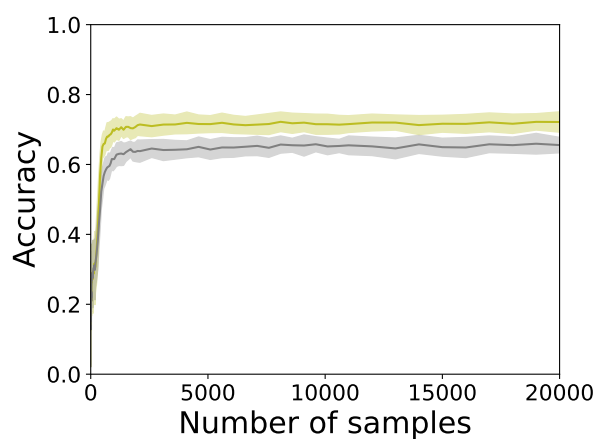

(c) Accuracy

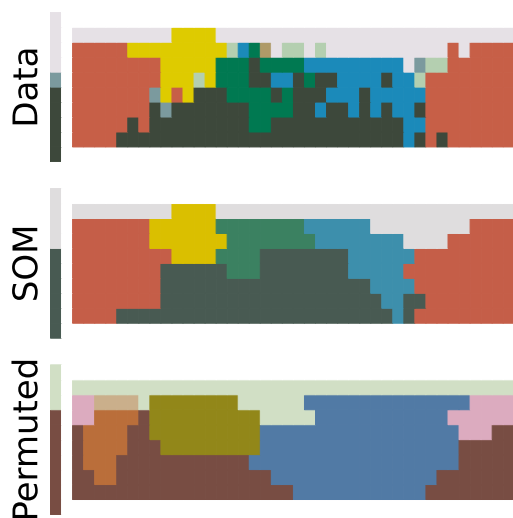

(d) Mode Maps

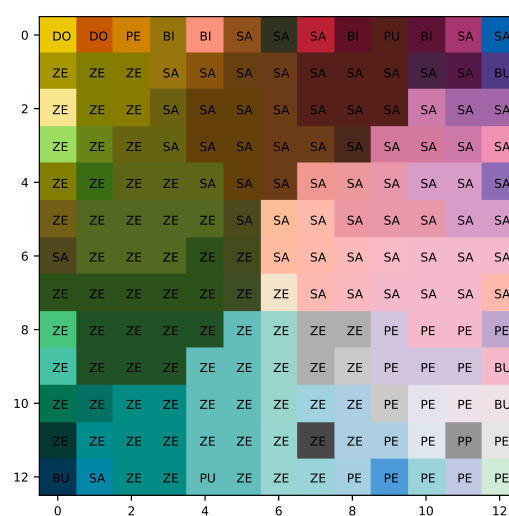

(e) Learnt SOM Cells

1.63. Maring;  $|\mathcal{W}| = 33$

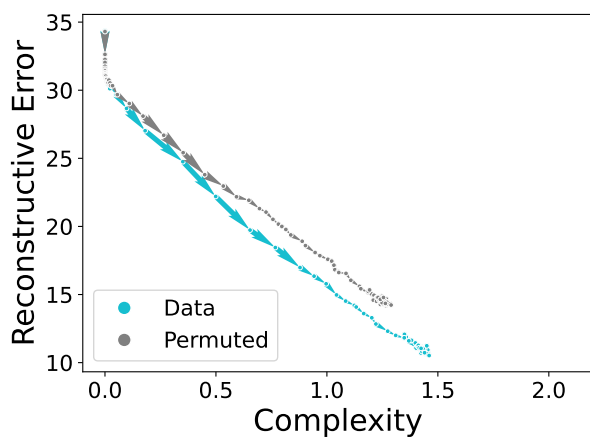

(a) Learning Space

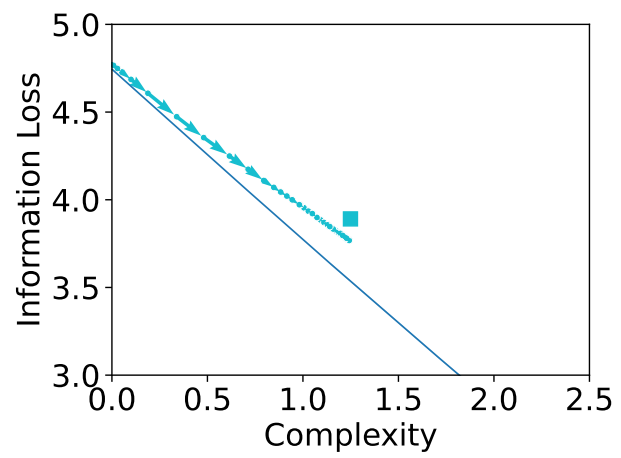

(b) Communicative Space

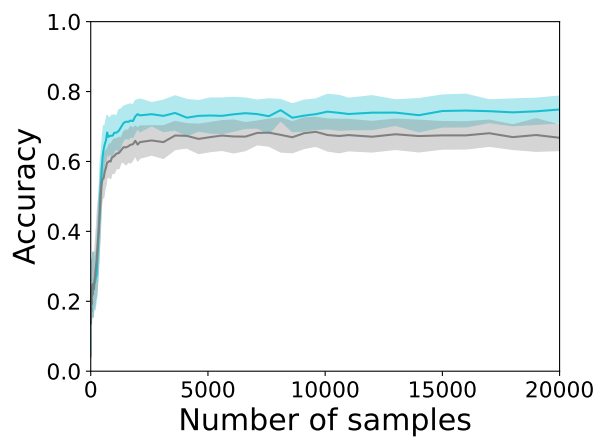

(c) Accuracy

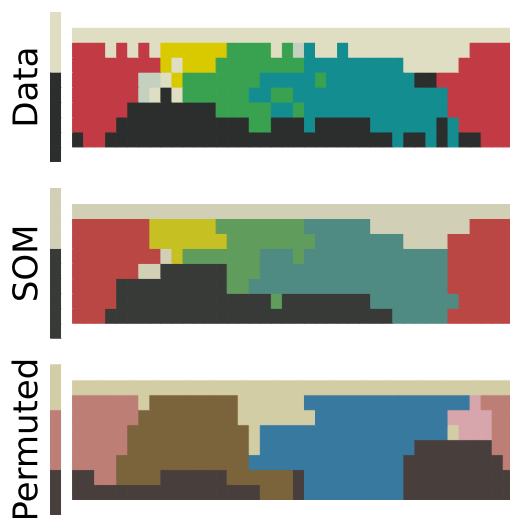

(d) Mode Maps

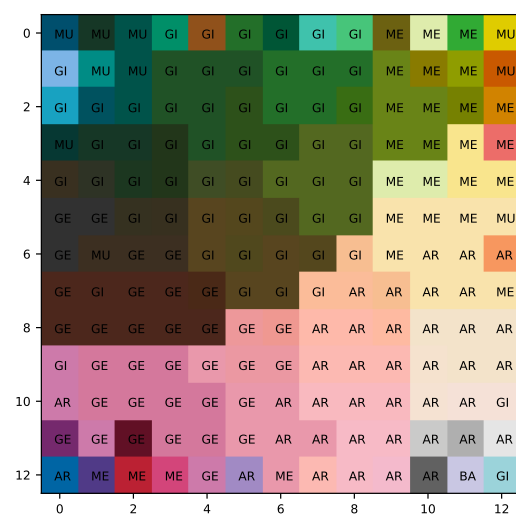

(e) Learnt SOM Cells

1.64. Martu Wangka;  $|\mathcal{W}| = 45$

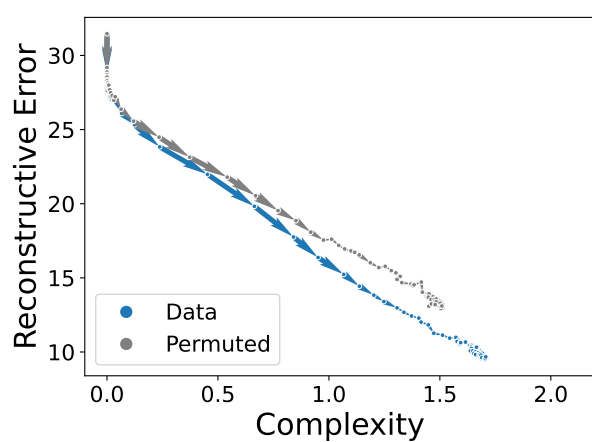

(a) Learning Space

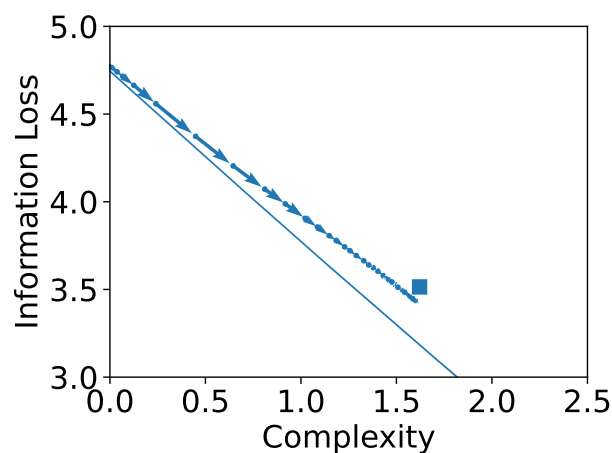

(b) Communicative Space

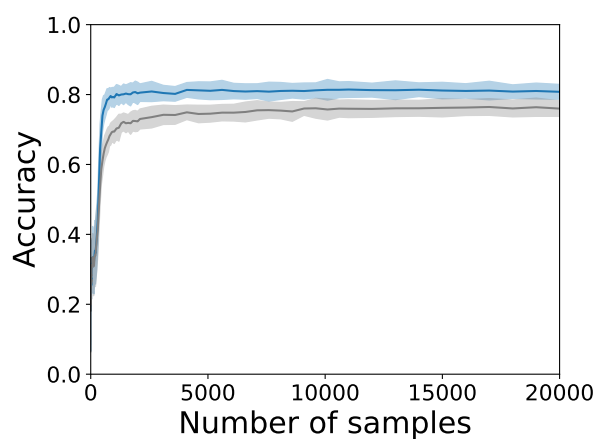

(c) Accuracy

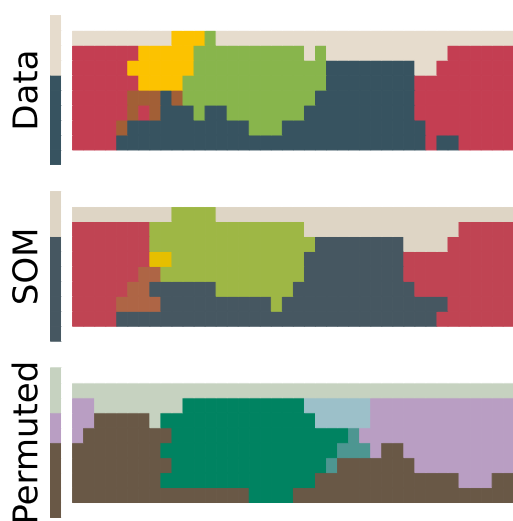

(d) Mode Maps

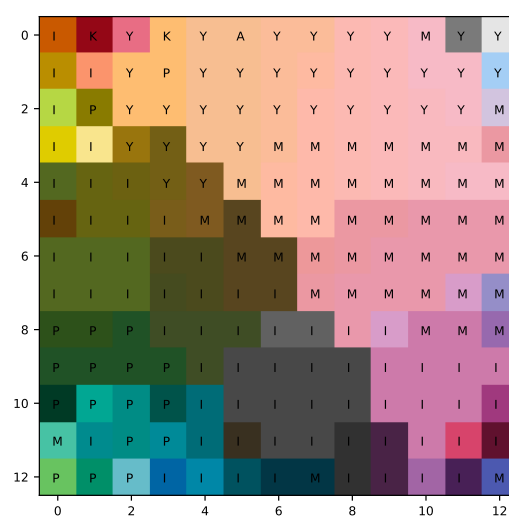

(e) Learnt SOM Cells

1.65. *Mawchi*;  $|\mathcal{W}| = 9$

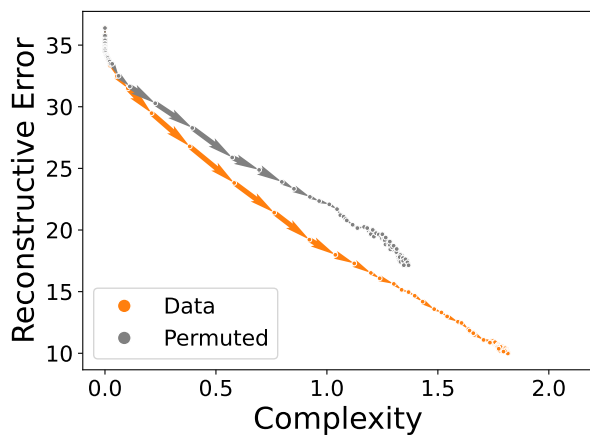

(a) Learning Space

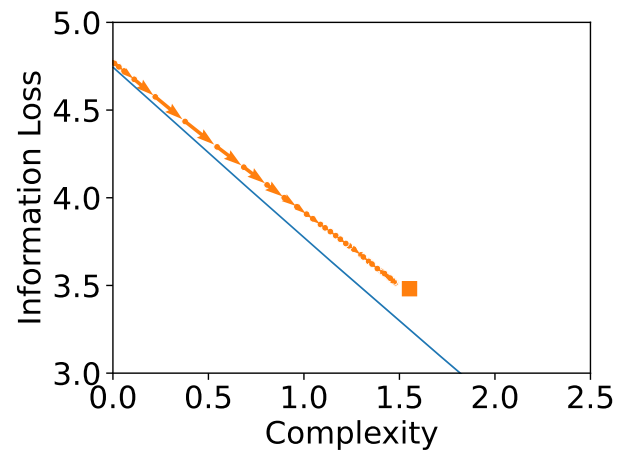

(b) Communicative Space

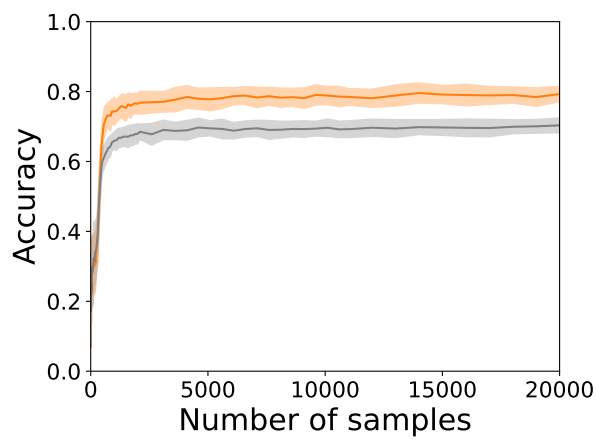

(c) Accuracy

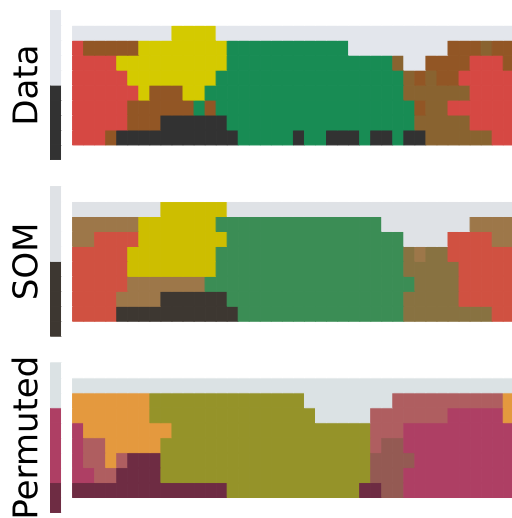

(d) Mode Maps

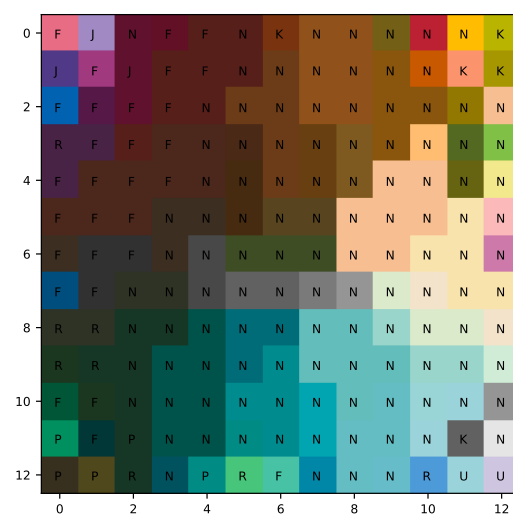

(e) Learnt SOM Cells

1.66. Mayoruna;  $|\mathcal{W}| = 5$

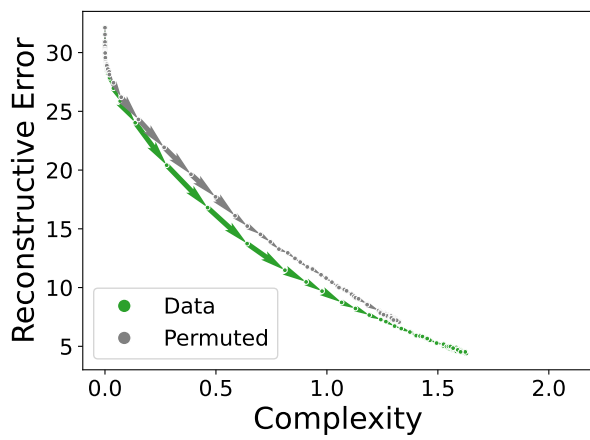

(a) Learning Space

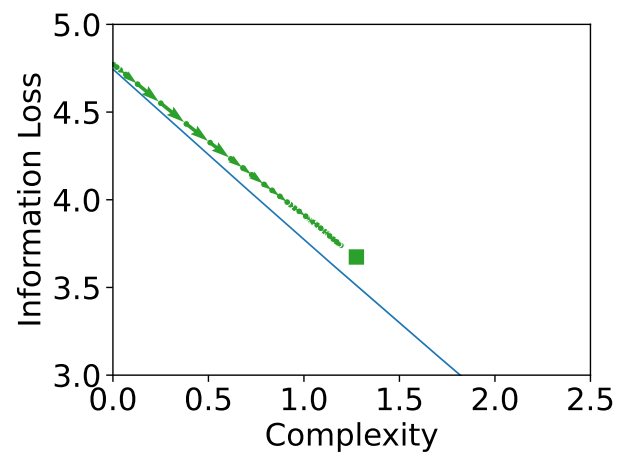

(b) Communicative Space

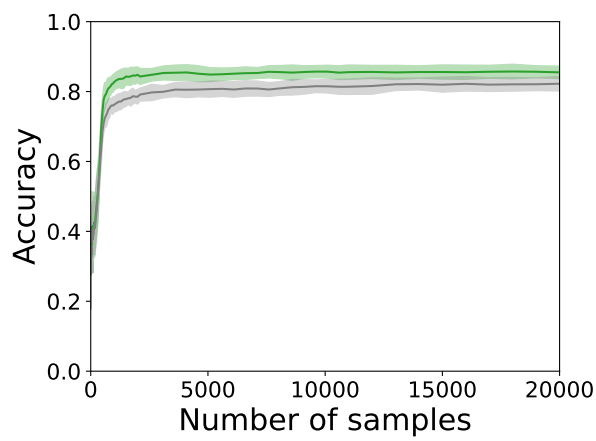

(c) Accuracy

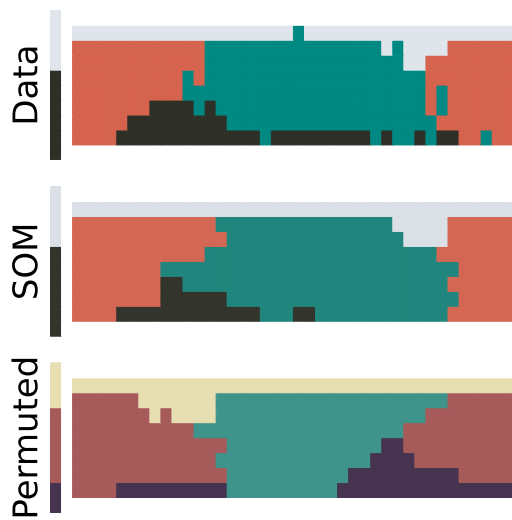

(d) Mode Maps

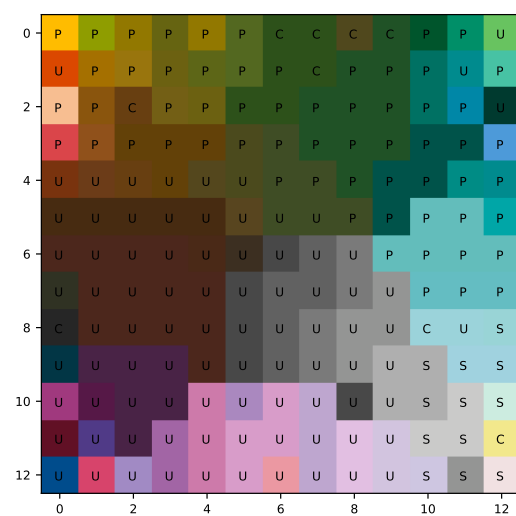

(e) Learnt SOM Cells

1.67. Mazahua;  $|\mathcal{W}| = 52$

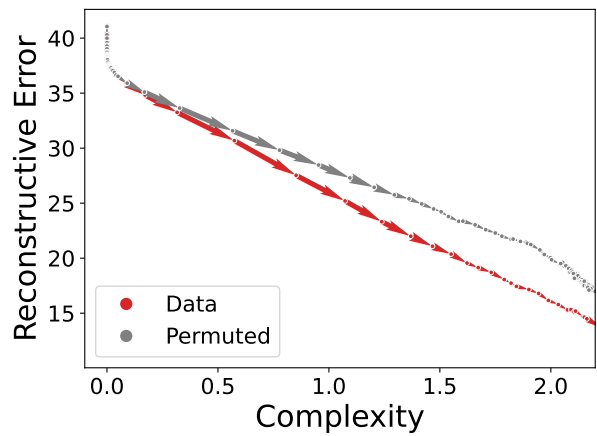

(a) Learning Space

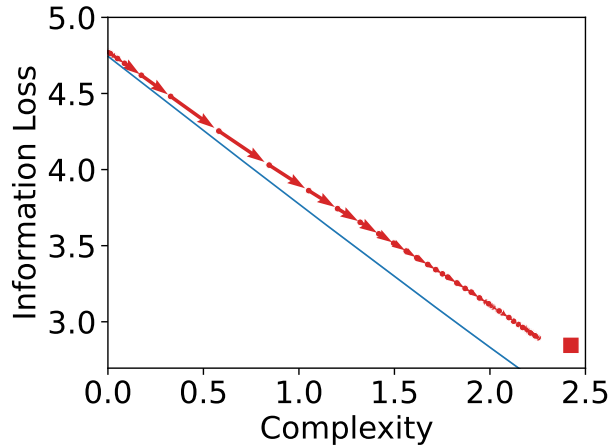

(b) Communicative Space

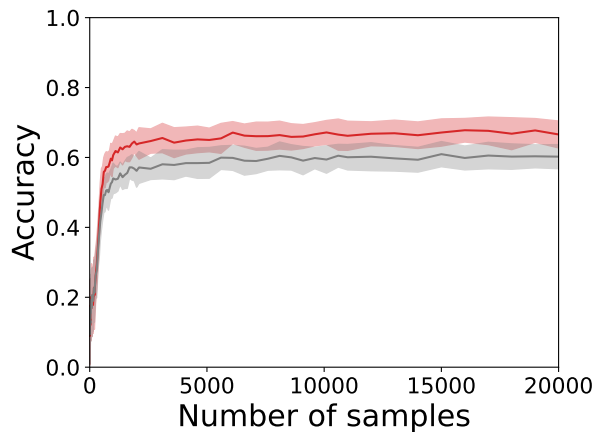

(c) Accuracy

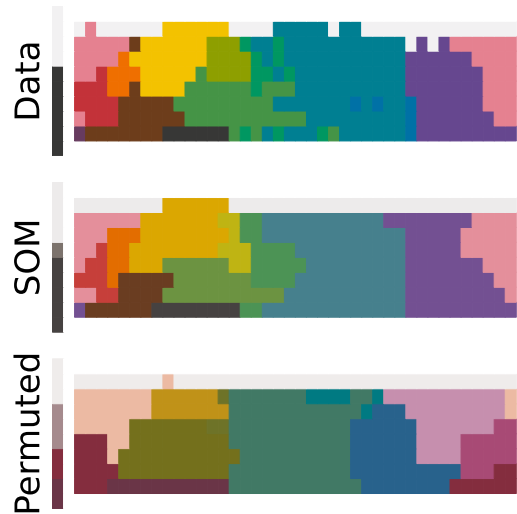

(d) Mode Maps

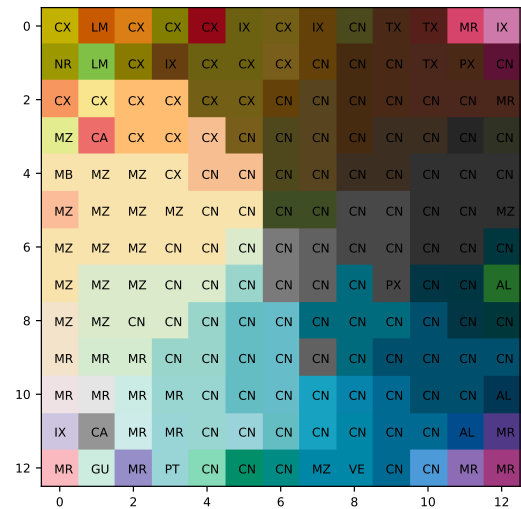

(e) Learnt SOM Cells



1.68. Mazateco;  $|\mathcal{W}| = 20$

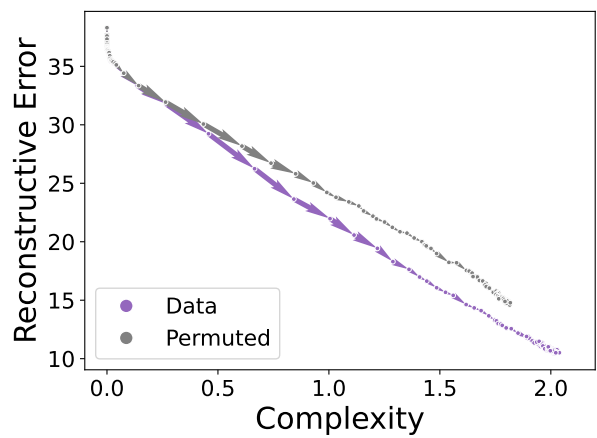

(a) Learning Space

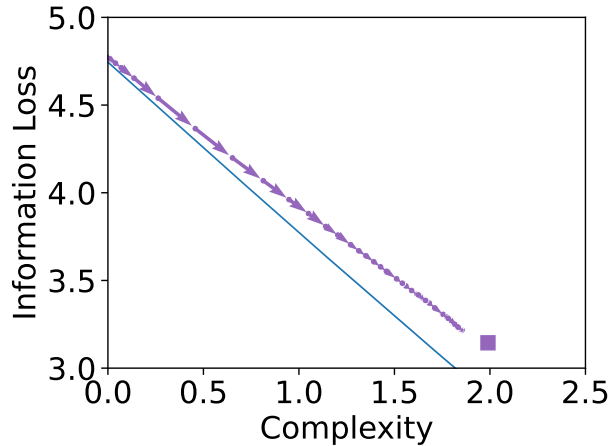

(b) Communicative Space

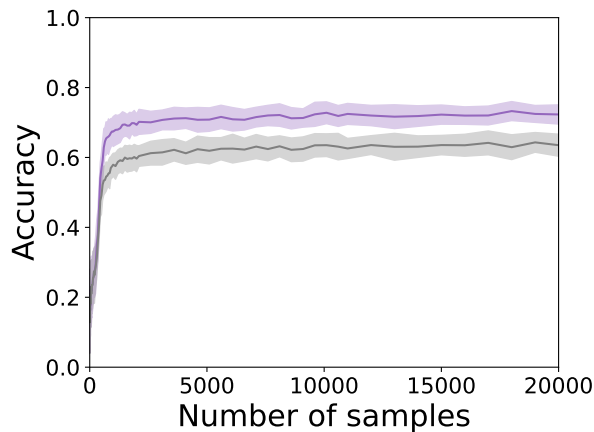

(c) Accuracy

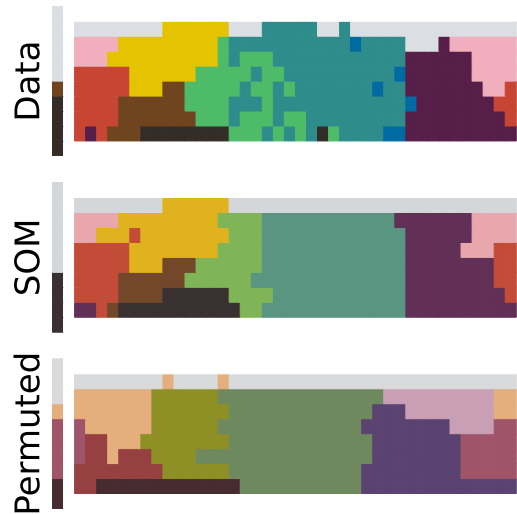

(d) Mode Maps

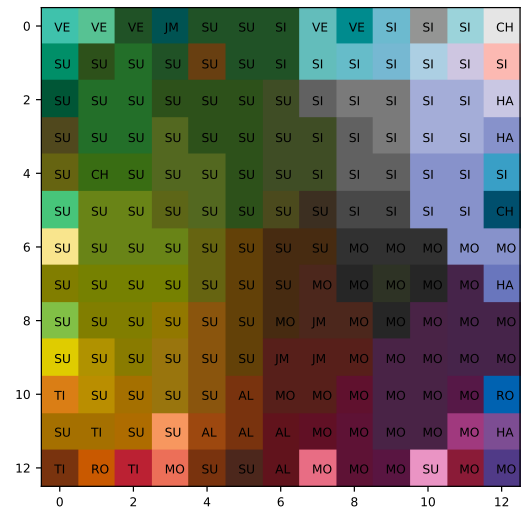

(e) Learnt SOM Cells

1.69. Menye;  $|\mathcal{W}| = 17$

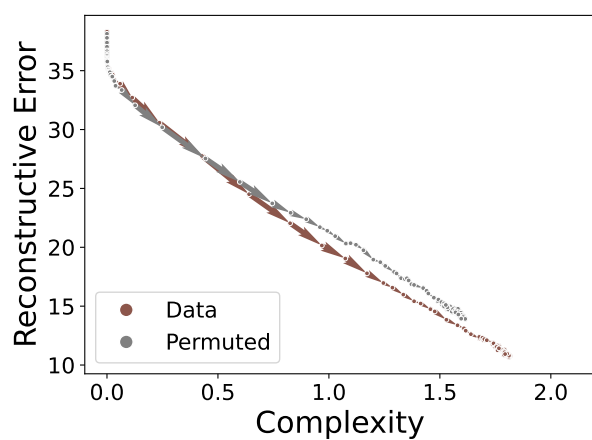

(a) Learning Space

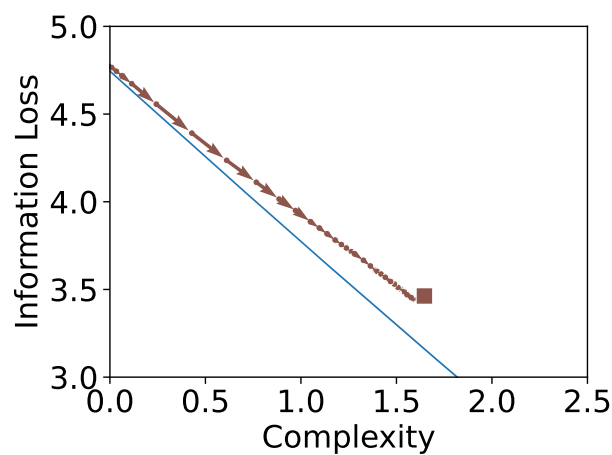

(b) Communicative Space

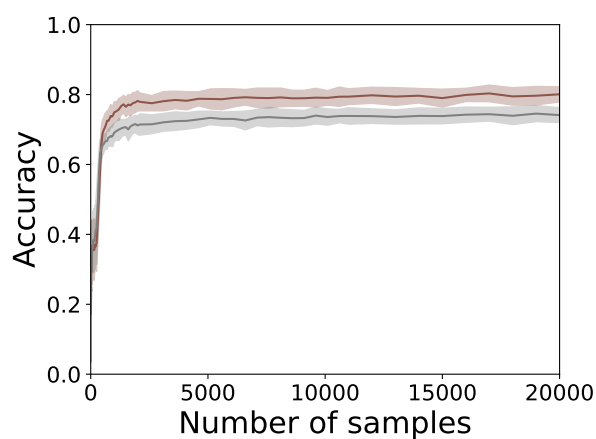

(c) Accuracy

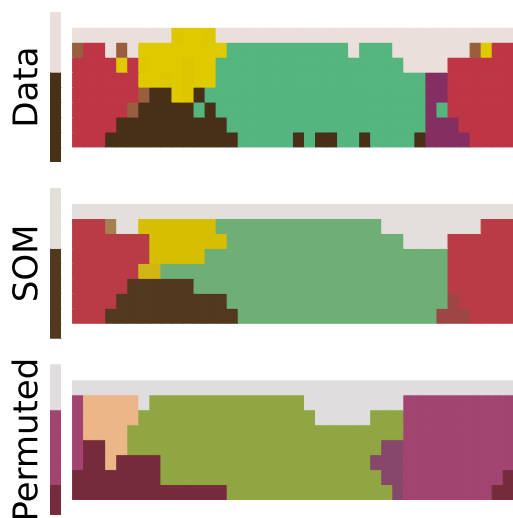

(d) Mode Maps

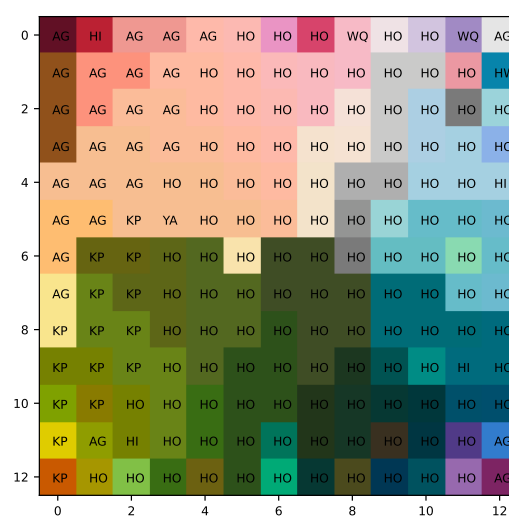

(e) Learnt SOM Cells

1.70. Micmac;  $|\mathcal{W}| = 31$

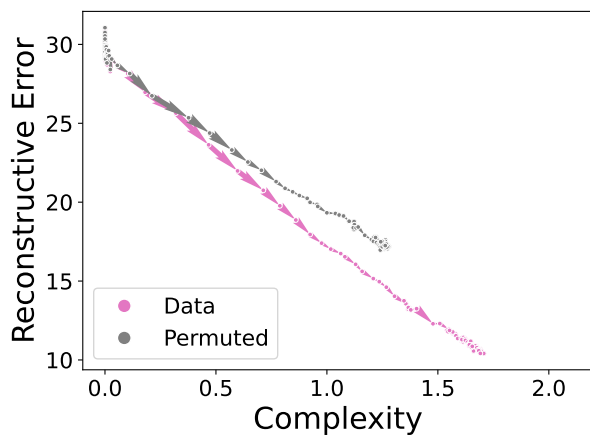

(a) Learning Space

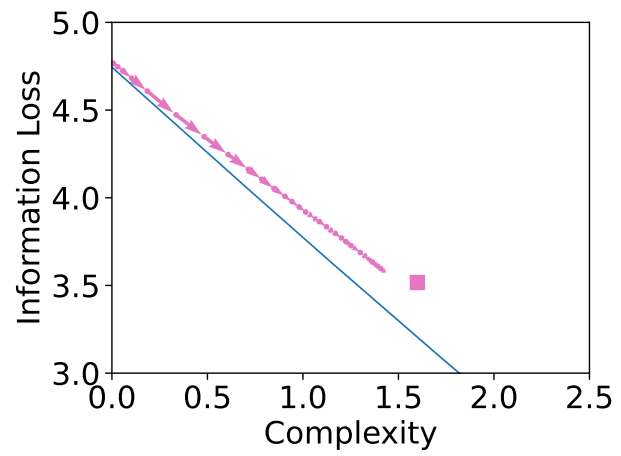

(b) Communicative Space

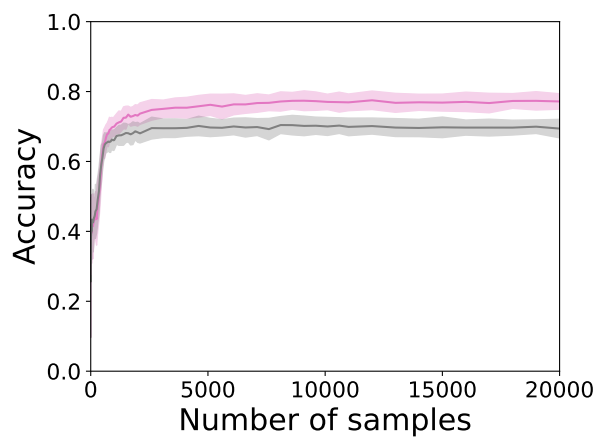

(c) Accuracy

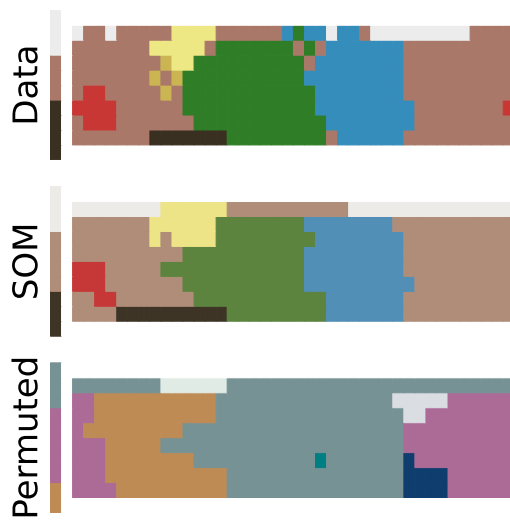

(d) Mode Maps

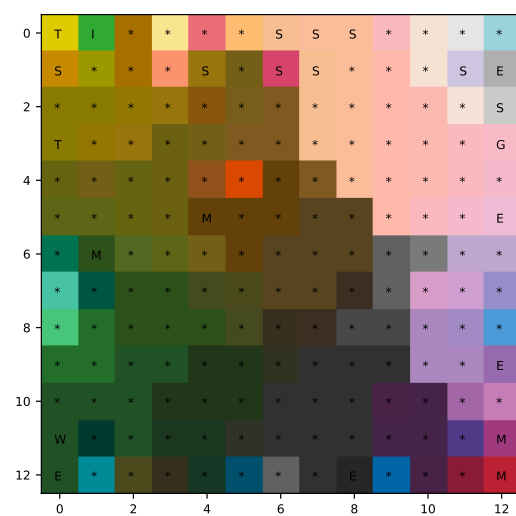

(e) Learnt SOM Cells

1.71. Mikasuki;  $|\mathcal{W}| = 14$

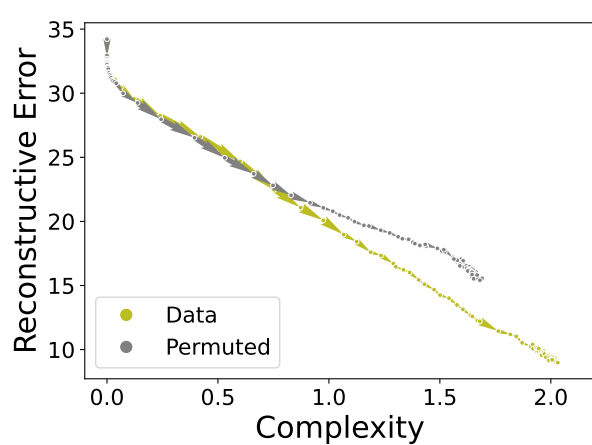

(a) Learning Space

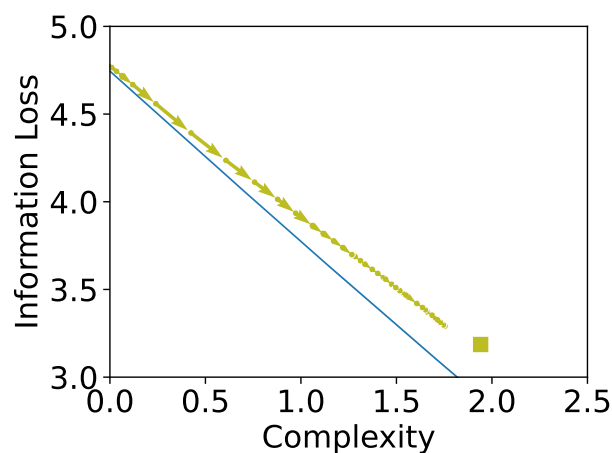

(b) Communicative Space

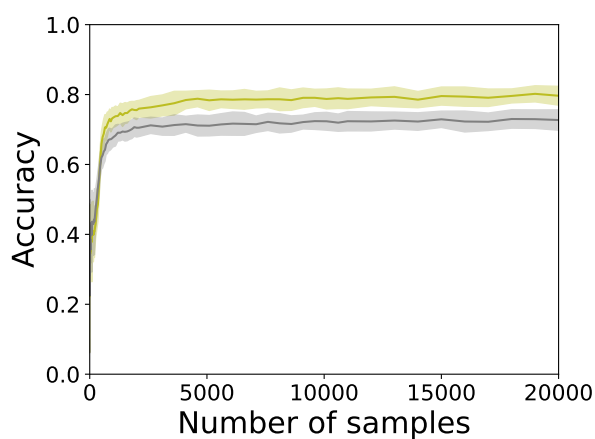

(c) Accuracy

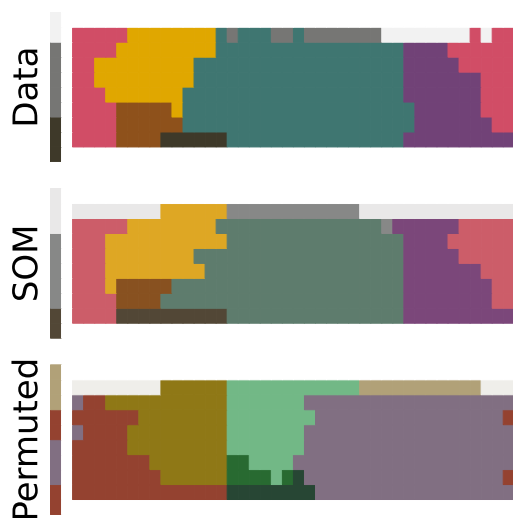

(d) Mode Maps

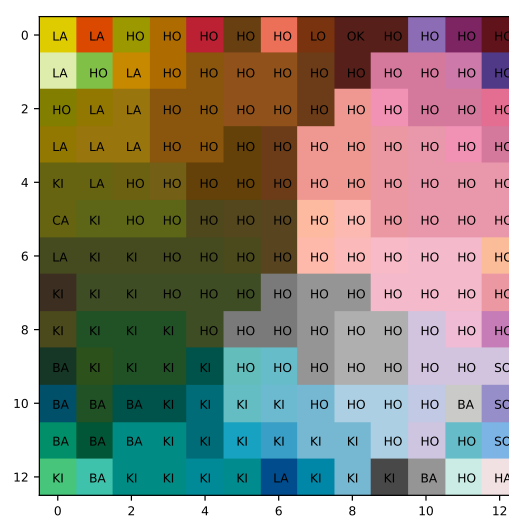

(e) Learnt SOM Cells

1.72. Mixteco;  $|\mathcal{W}| = 30$

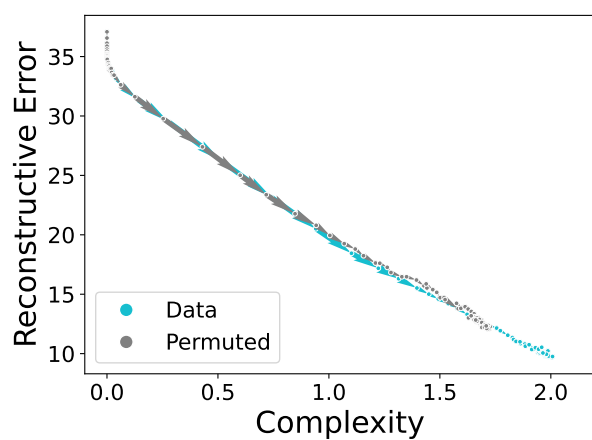

(a) Learning Space

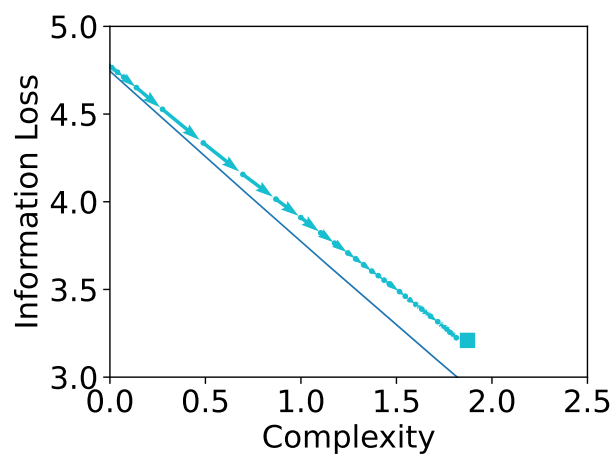

(b) Communicative Space

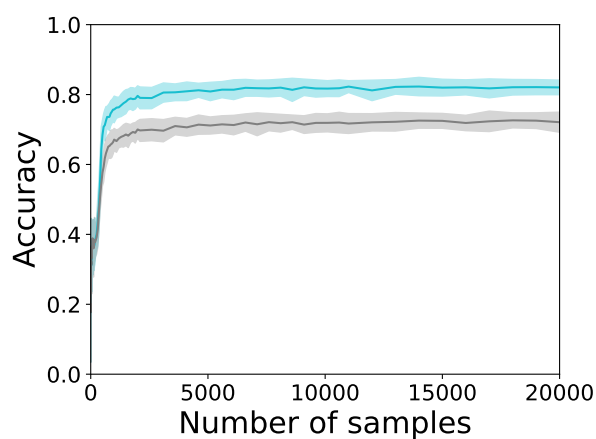

(c) Accuracy

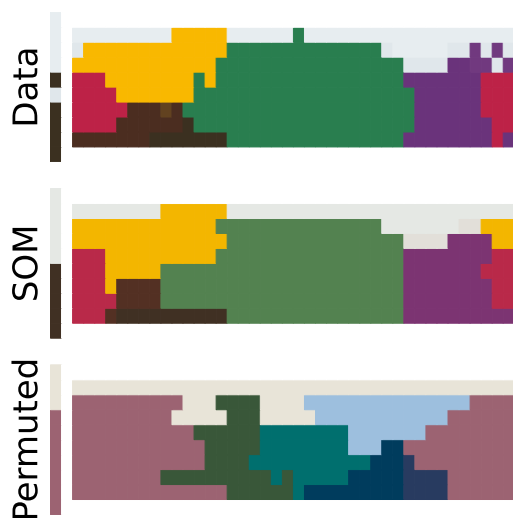

(d) Mode Maps

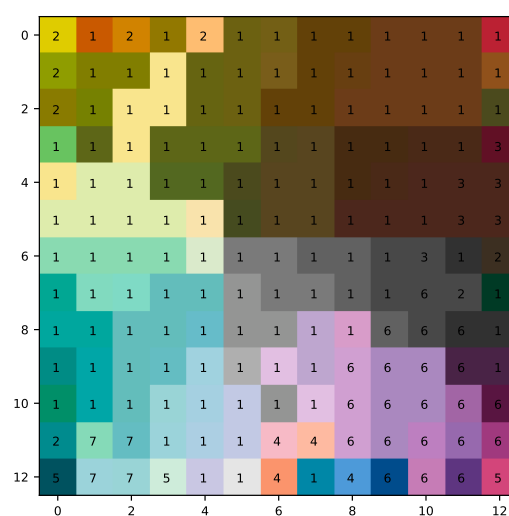

(e) Learnt SOM Cells

### 1.73. Mundu; $|\mathcal{W}| = 12$

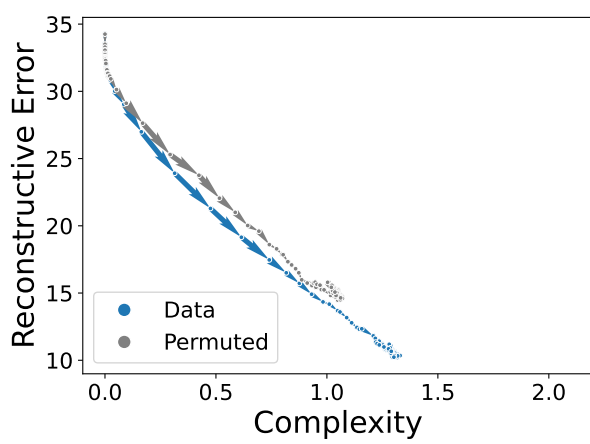

(a) Learning Space

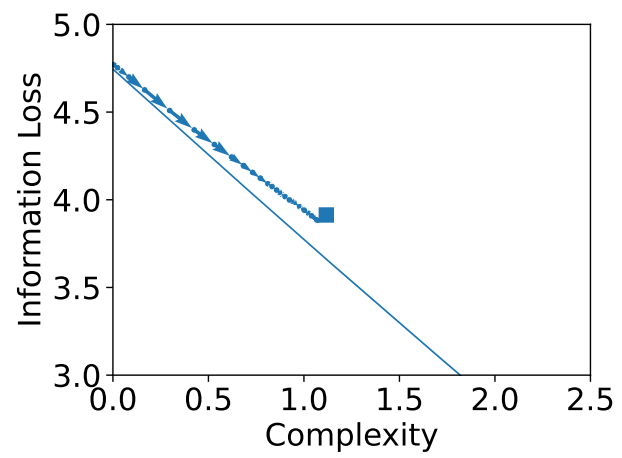

(b) Communicative Space

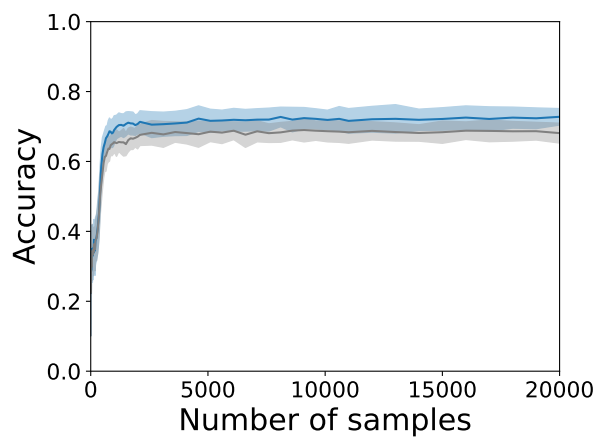

(c) Accuracy

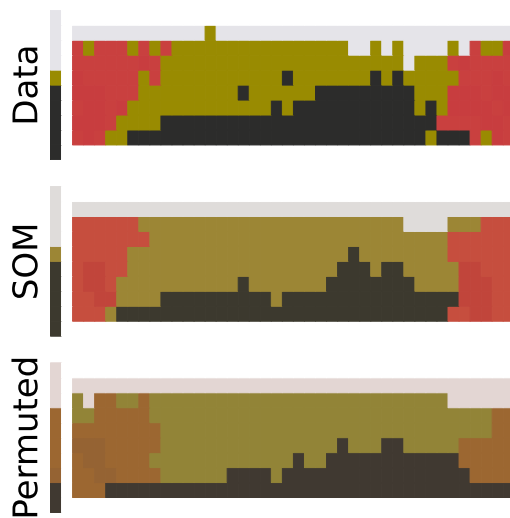

(d) Mode Maps

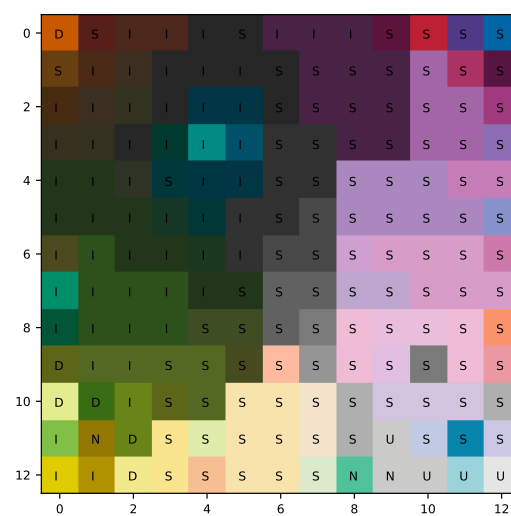

(e) Learnt SOM Cells

1.74. Múra Pirahá;  $|\mathcal{W}| = 5$

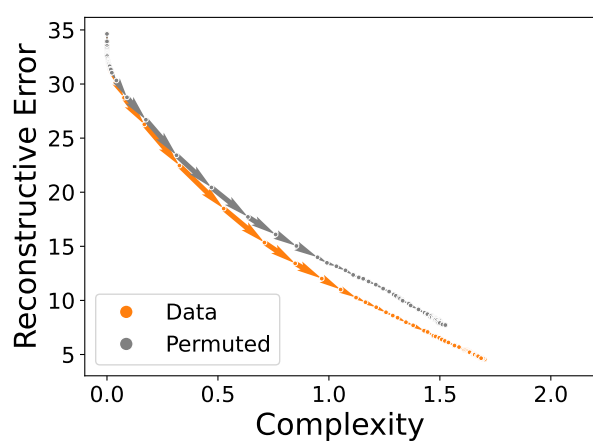

(a) Learning Space

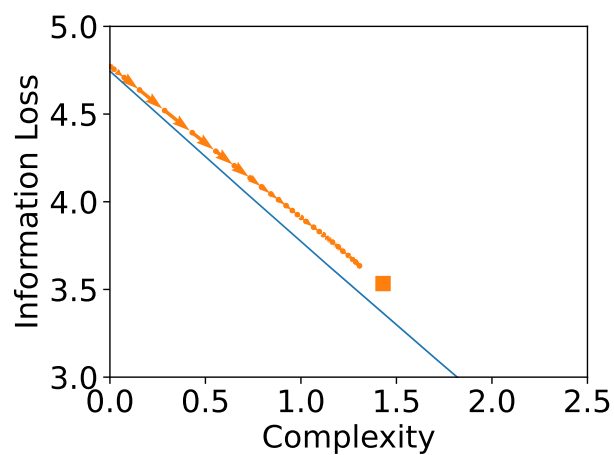

(b) Communicative Space

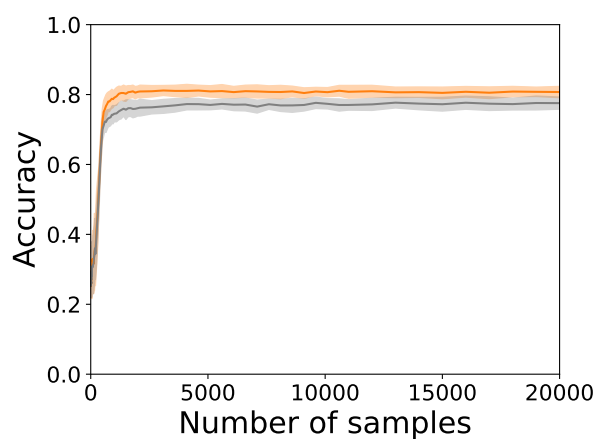

(c) Accuracy

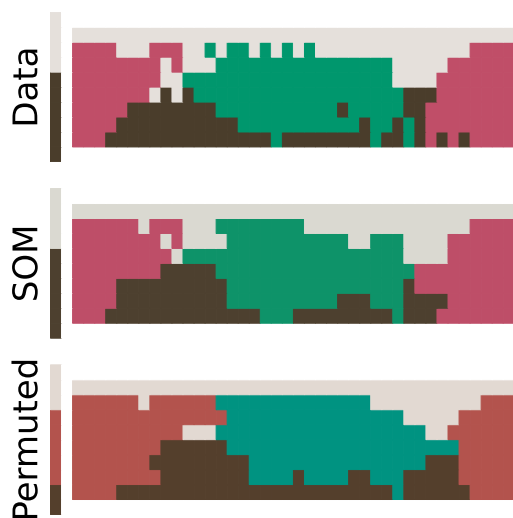

(d) Mode Maps

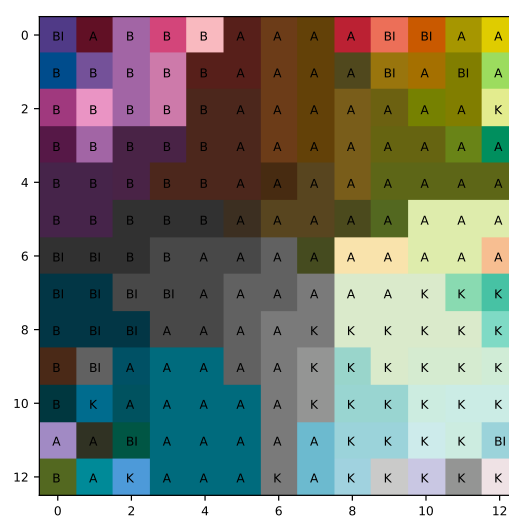

(e) Learnt SOM Cells

1.75. Murle;  $|\mathcal{W}| = 15$

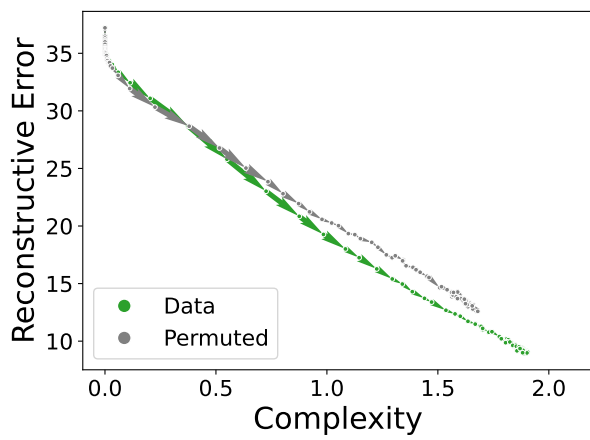

(a) Learning Space

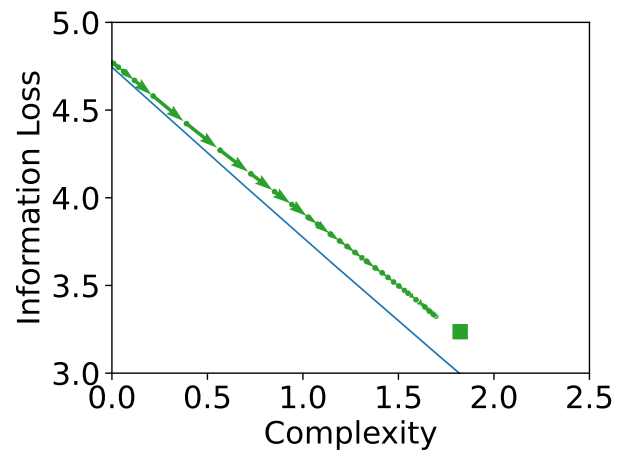

(b) Communicative Space

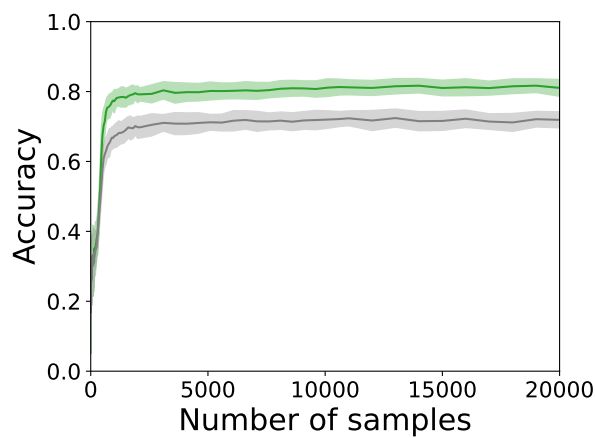

(c) Accuracy

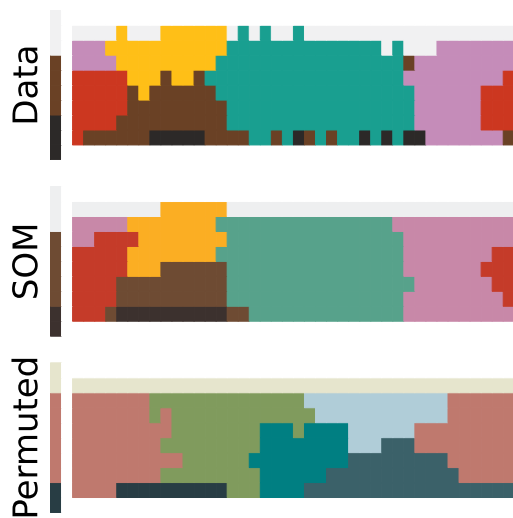

(d) Mode Maps

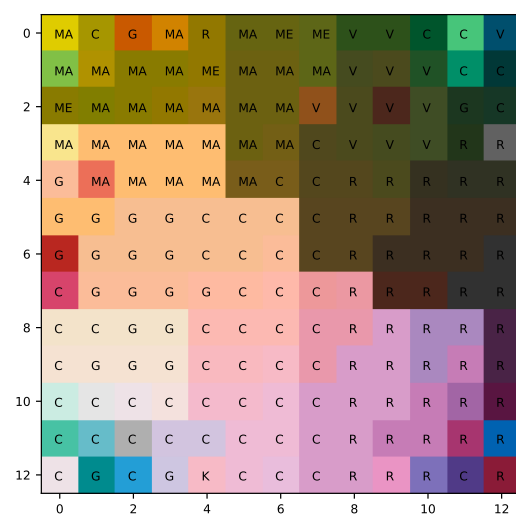

(e) Learnt SOM Cells



# 1.76. Murinbata; $|\mathcal{W}| = 22$

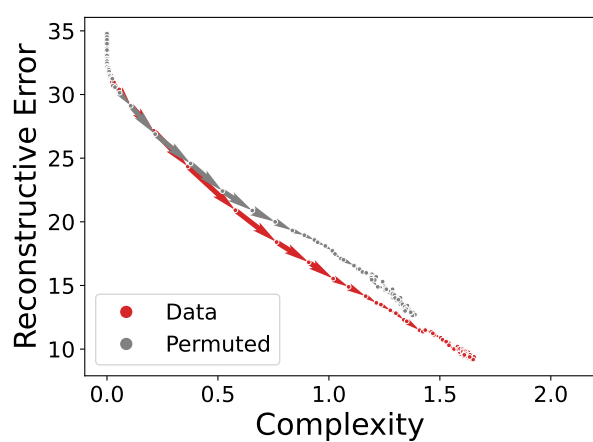

(a) Learning Space

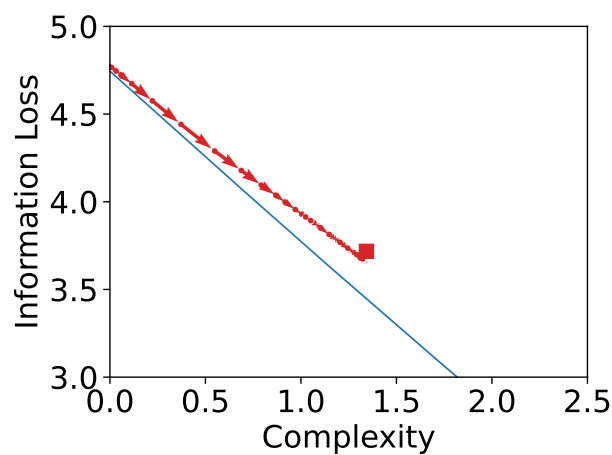

(b) Communicative Space

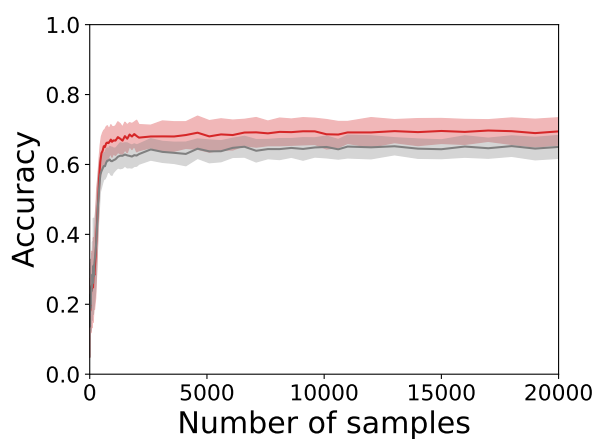

(c) Accuracy

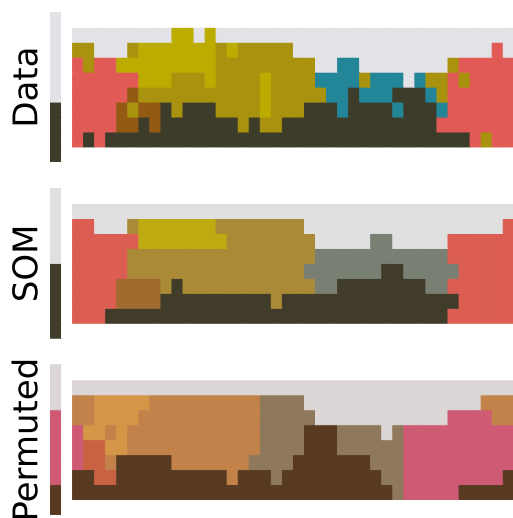

(d) Mode Maps

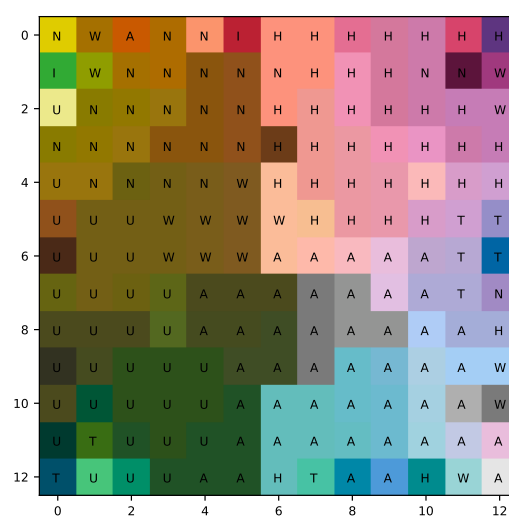

(e) Learnt SOM Cells

1.77. Nafaanra;  $|\mathcal{W}| = 5$

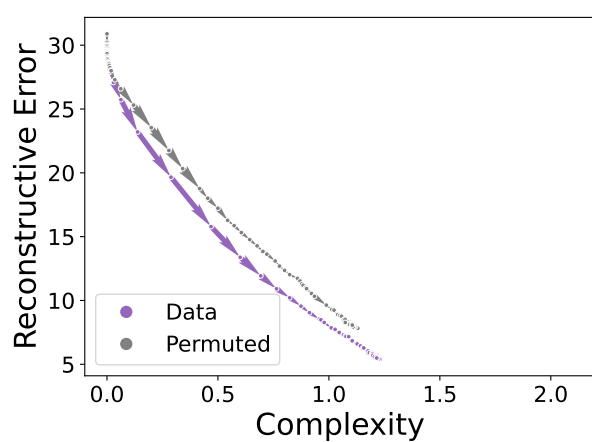

(a) Learning Space

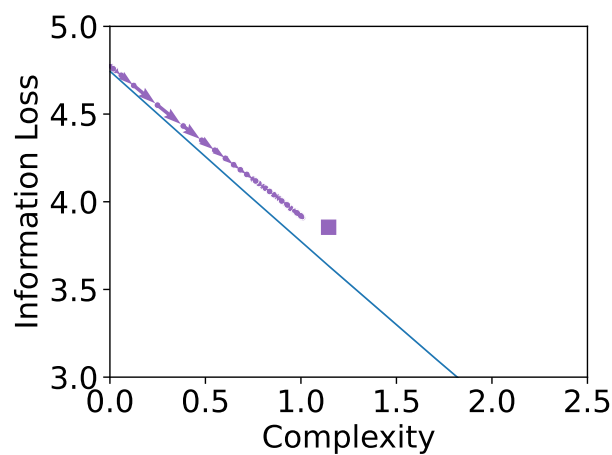

(b) Communicative Space

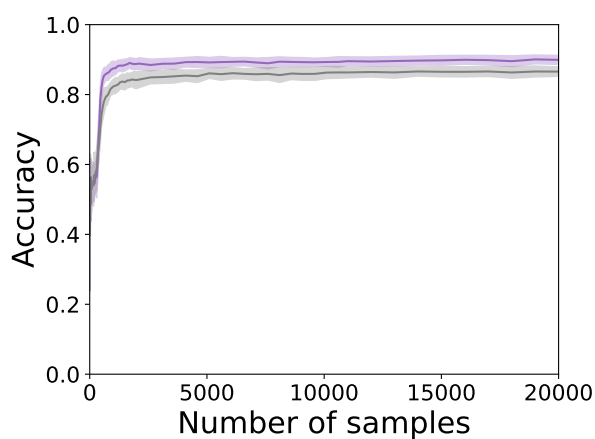

(c) Accuracy

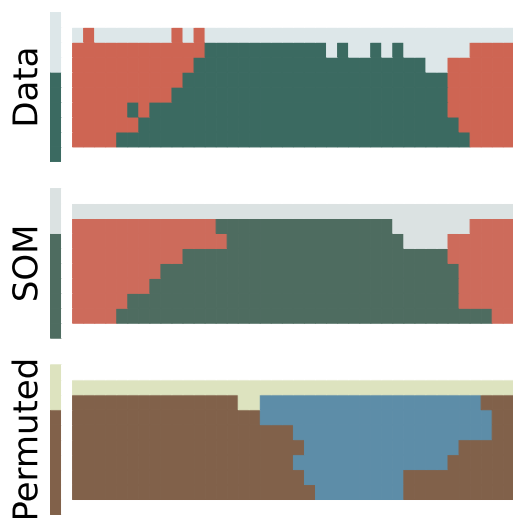

(d) Mode Maps

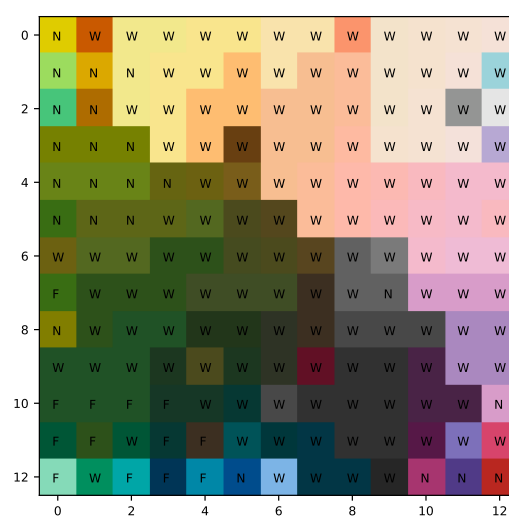

(e) Learnt SOM Cells

### 1.78. Nahuatl; $|\mathcal{W}| = 16$

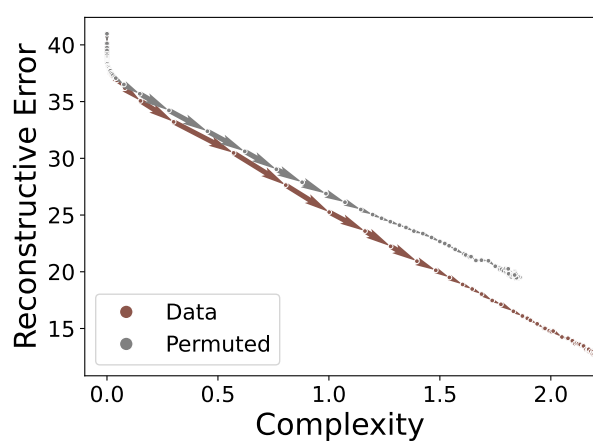

(a) Learning Space

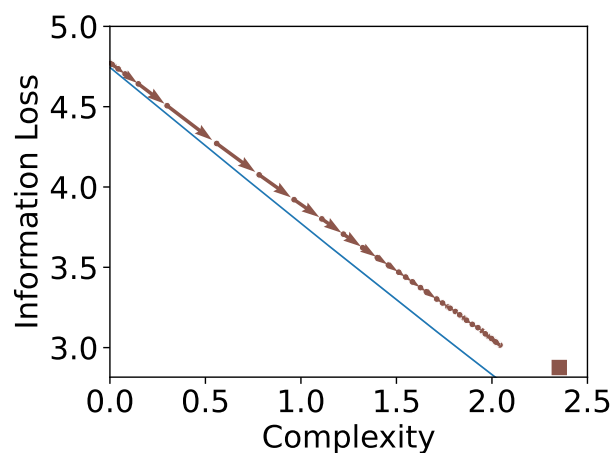

(b) Communicative Space

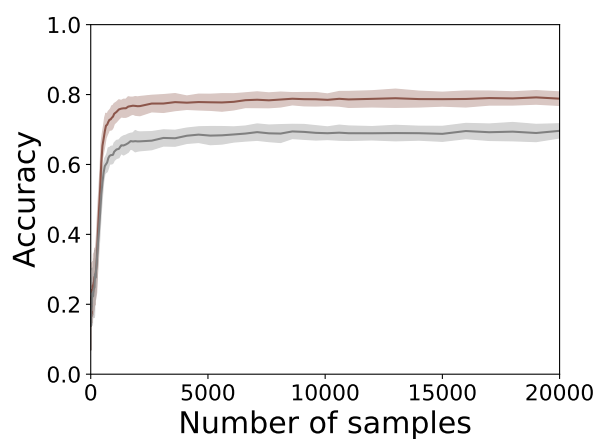

(c) Accuracy

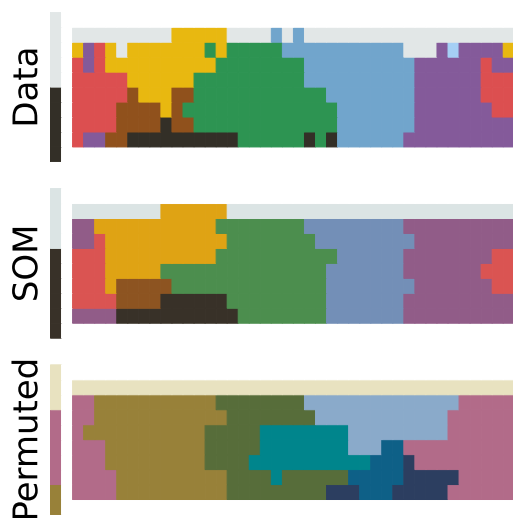

(d) Mode Maps

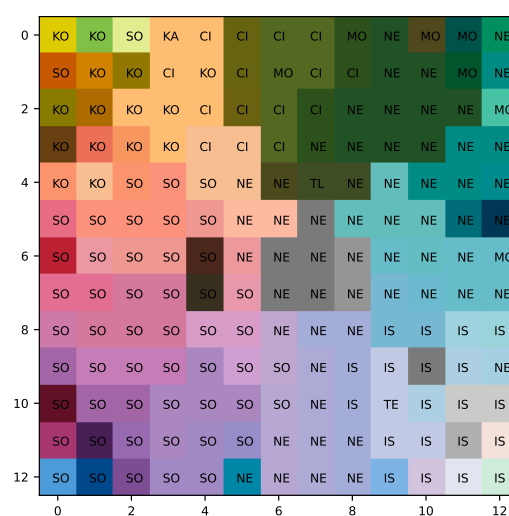

(e) Learnt SOM Cells

1.79. Ocaina;  $|\mathcal{W}| = 12$

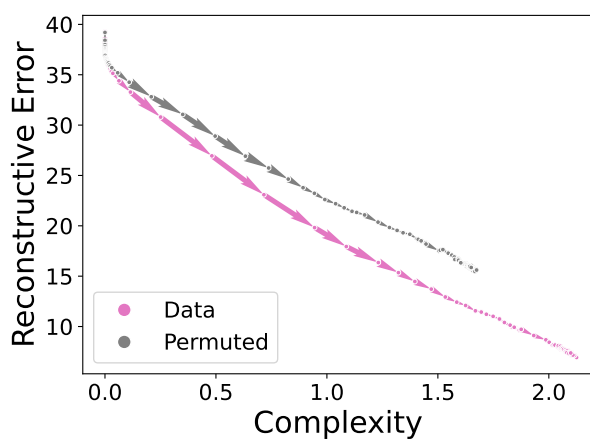

(a) Learning Space

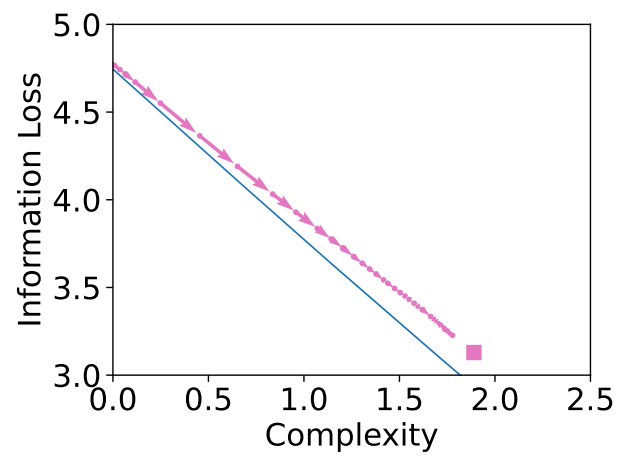

(b) Communicative Space

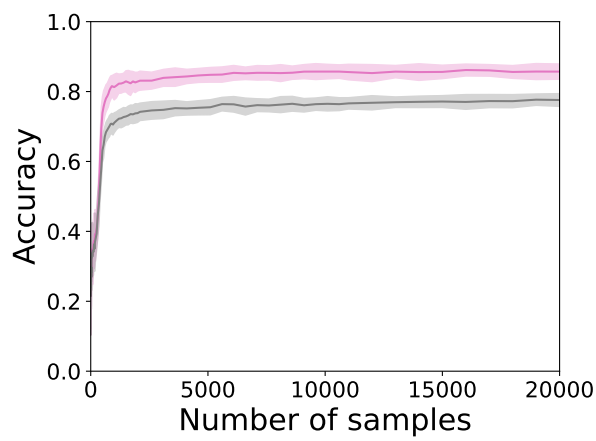

(c) Accuracy

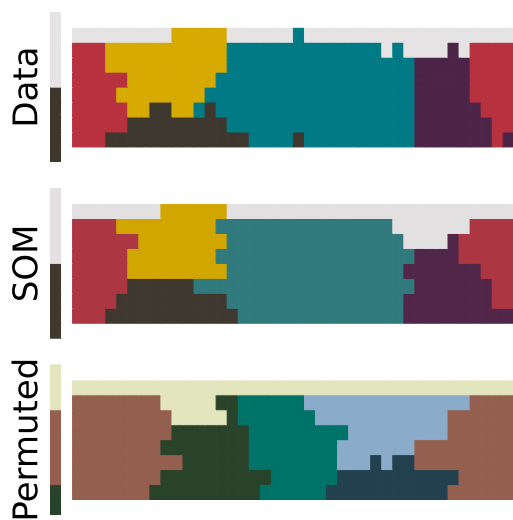

(d) Mode Maps

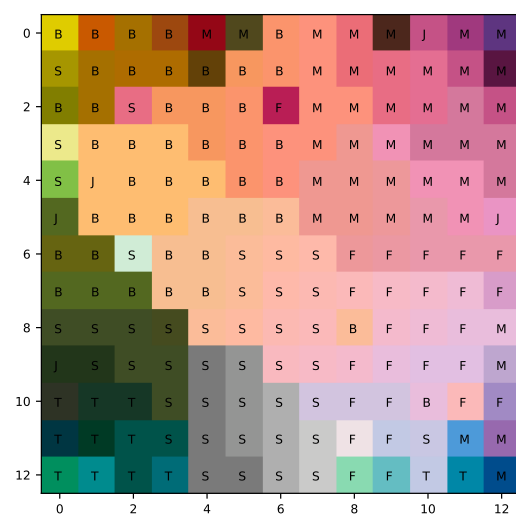

(e) Learnt SOM Cells

1.80. Papago;  $|\mathcal{W}| = 26$

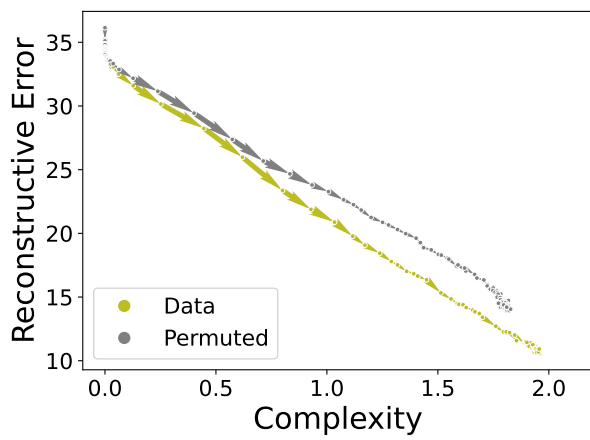

(a) Learning Space

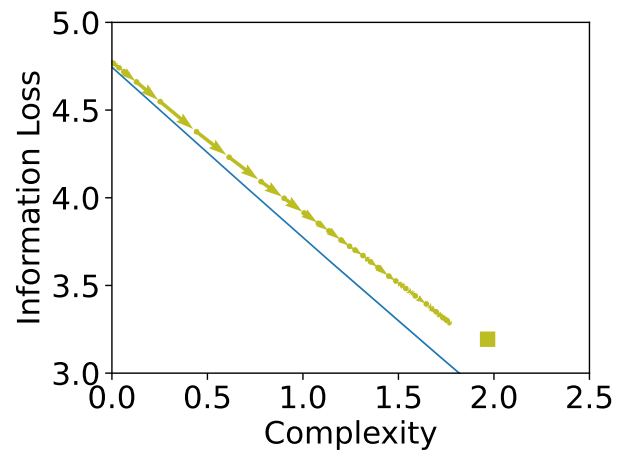

(b) Communicative Space

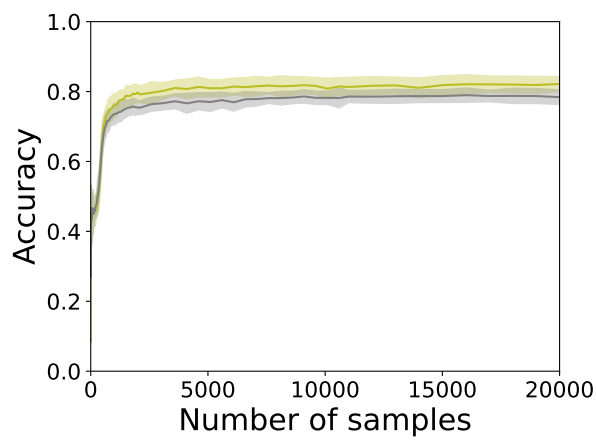

(c) Accuracy

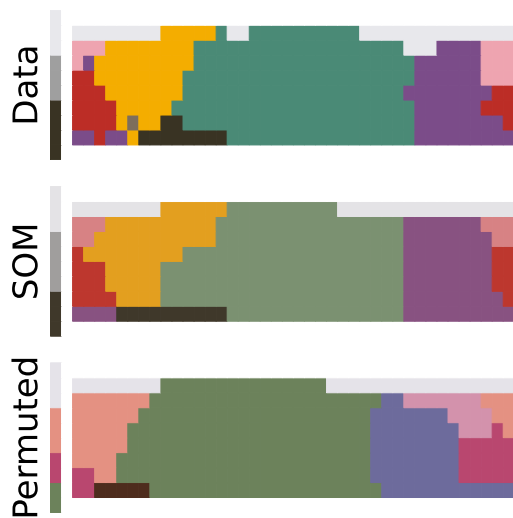

(d) Mode Maps

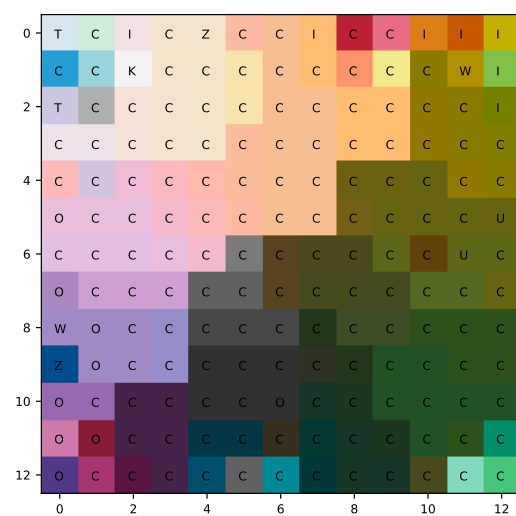

(e) Learnt SOM Cells

1.81. Patep;  $|\mathcal{W}| = 15$

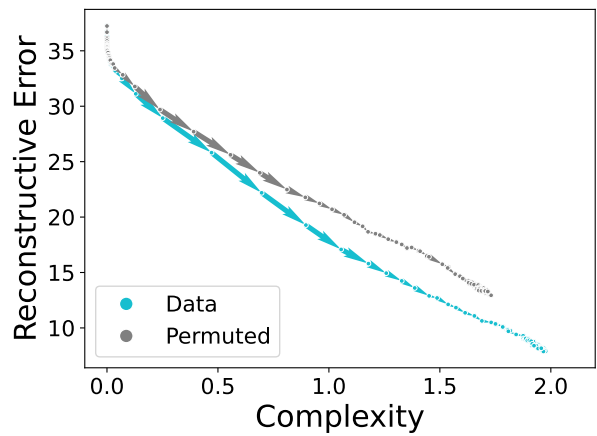

(a) Learning Space

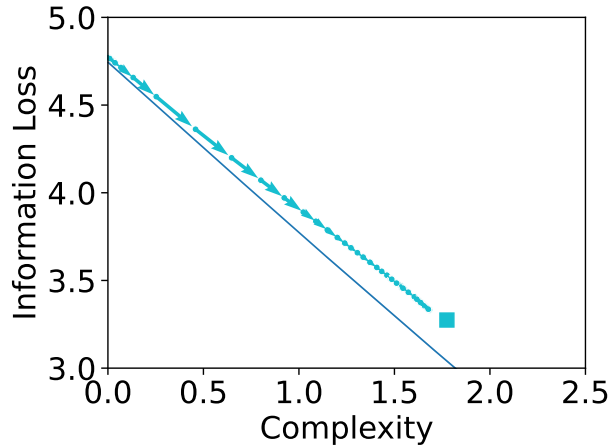

(b) Communicative Space

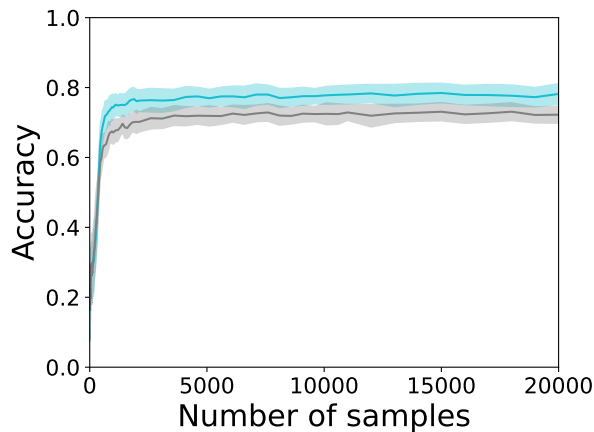

(c) Accuracy

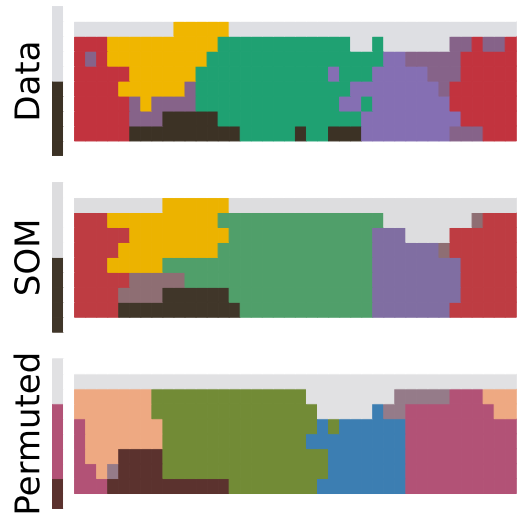

(d) Mode Maps

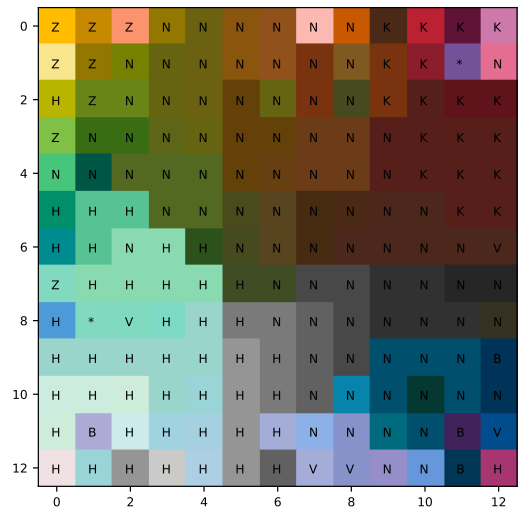

(e) Learnt SOM Cells

1.82. Paya;  $|\mathcal{W}| = 13$

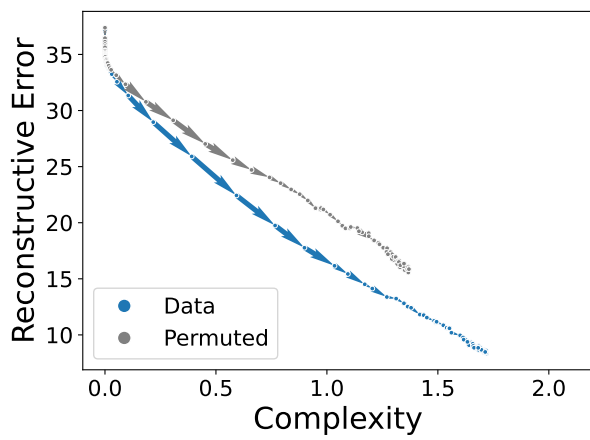

(a) Learning Space

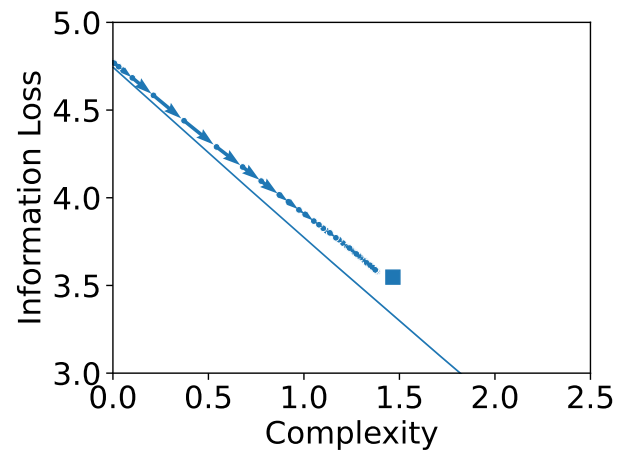

(b) Communicative Space

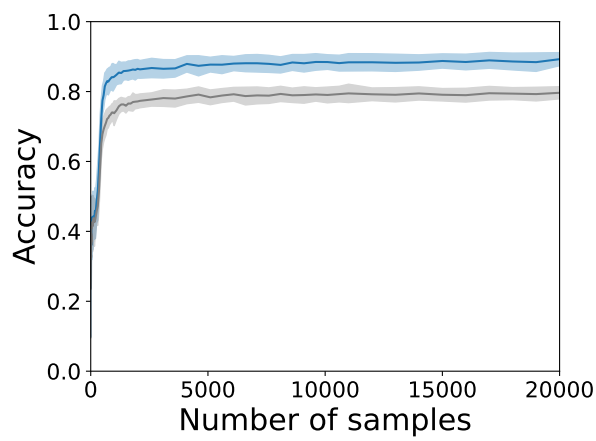

(c) Accuracy

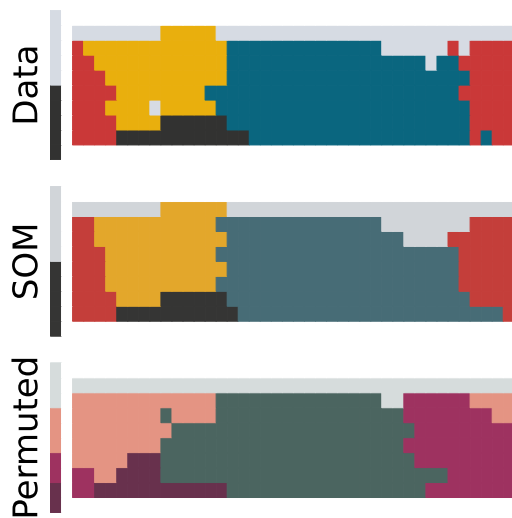

(d) Mode Maps

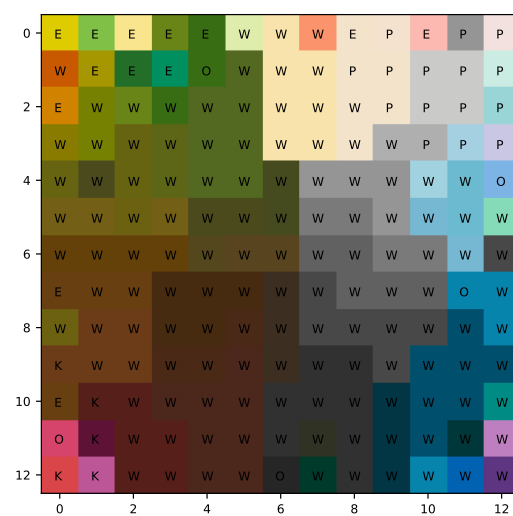

(e) Learnt SOM Cells

### 1.83. Podopa; $|\mathcal{W}| = 19$

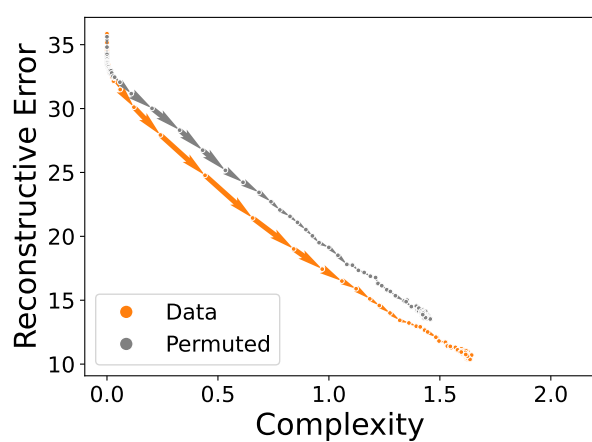

(a) Learning Space

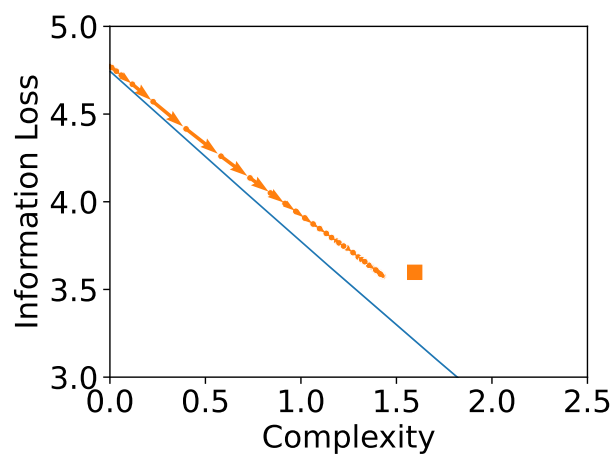

(b) Communicative Space

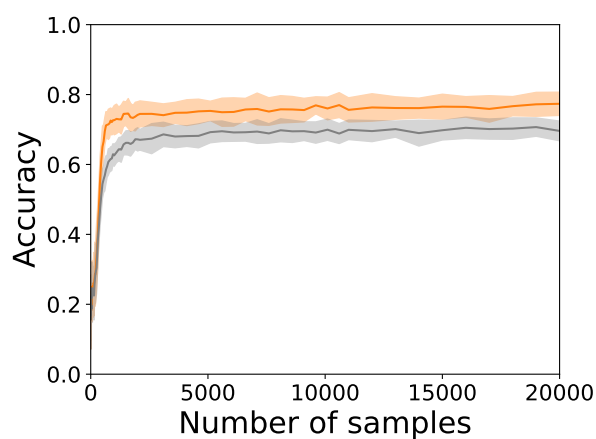

(c) Accuracy

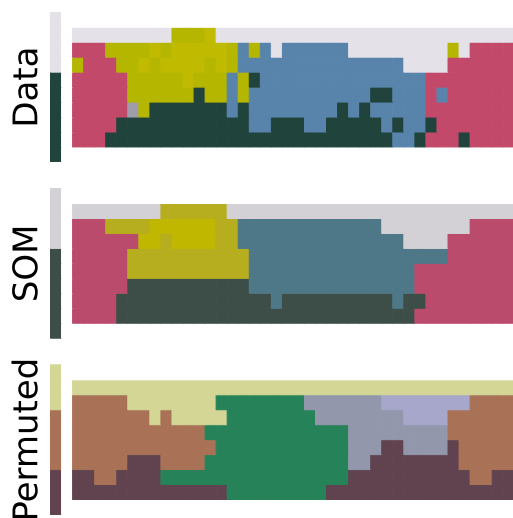

(d) Mode Maps

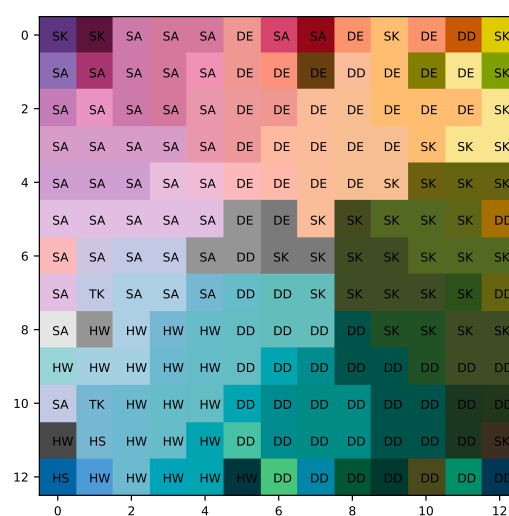

(e) Learnt SOM Cells



1.84. Saramaccan;  $|\mathcal{W}| = 41$

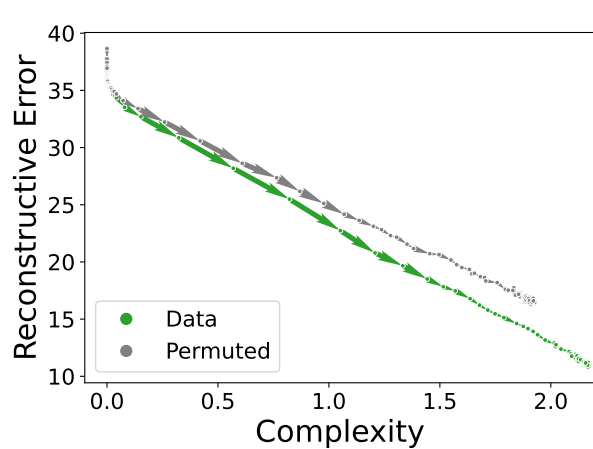

(a) Learning Space

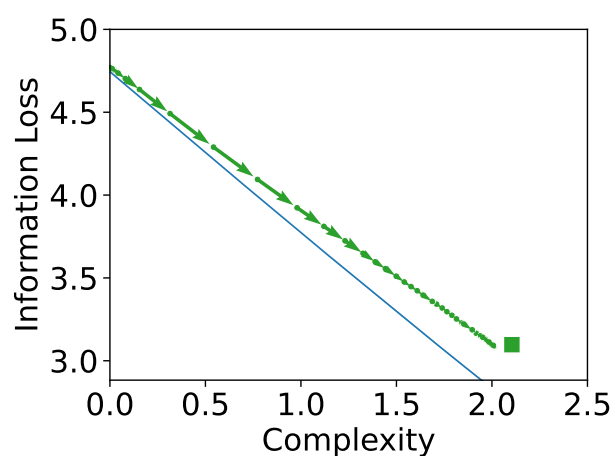

(b) Communicative Space

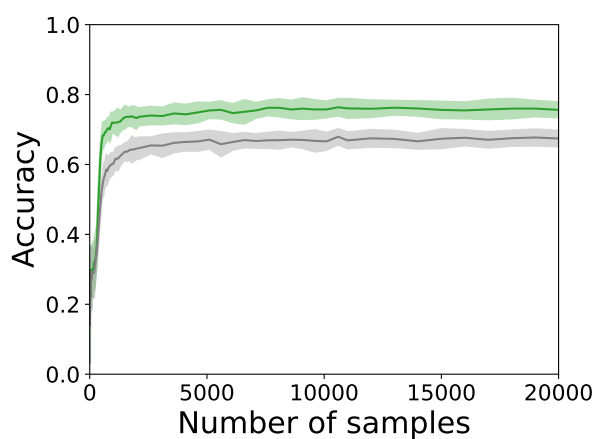

(c) Accuracy

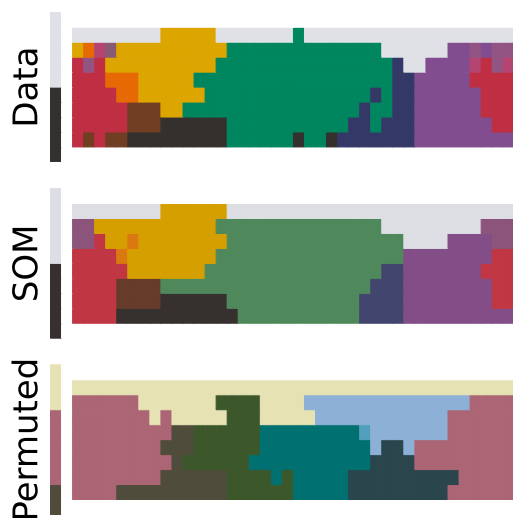

(d) Mode Maps

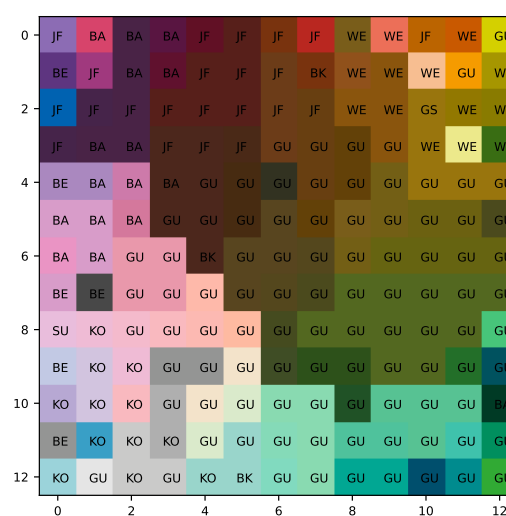

(e) Learnt SOM Cells

1.85. *Seri*;  $|\mathcal{W}| = 12$

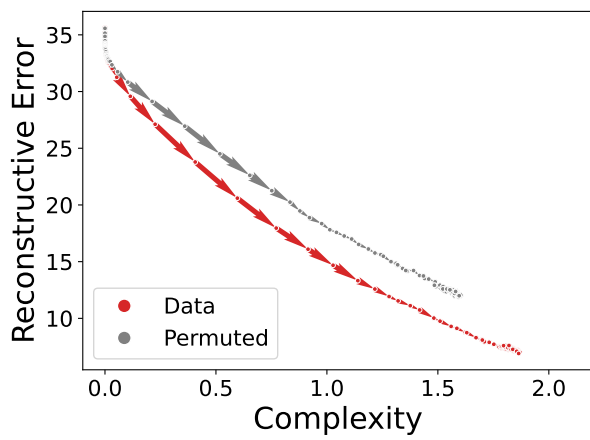

(a) Learning Space

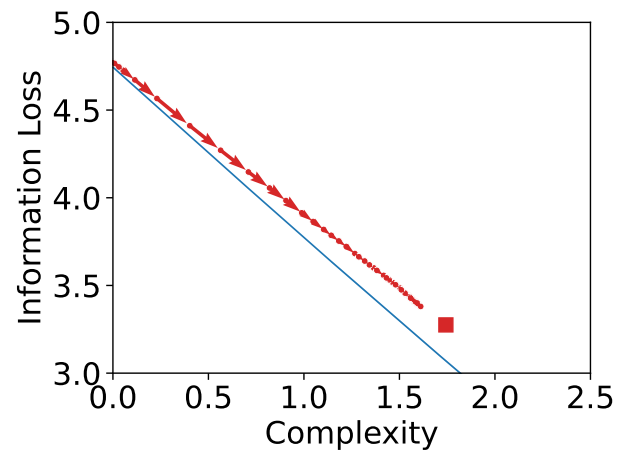

(b) Communicative Space

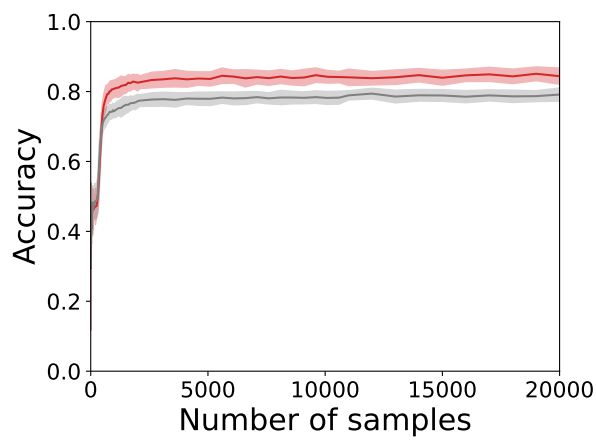

(c) Accuracy

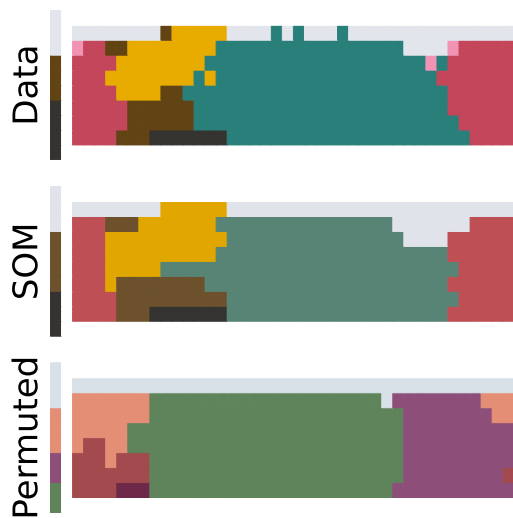

(d) Mode Maps

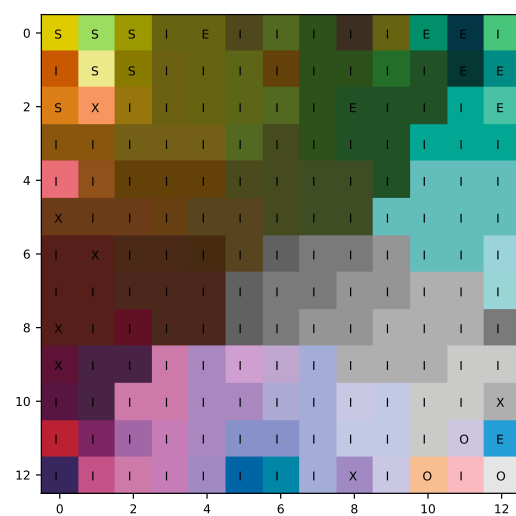

(e) Learnt SOM Cells

### 1.86. Shipibo; $|\mathcal{W}| = 21$

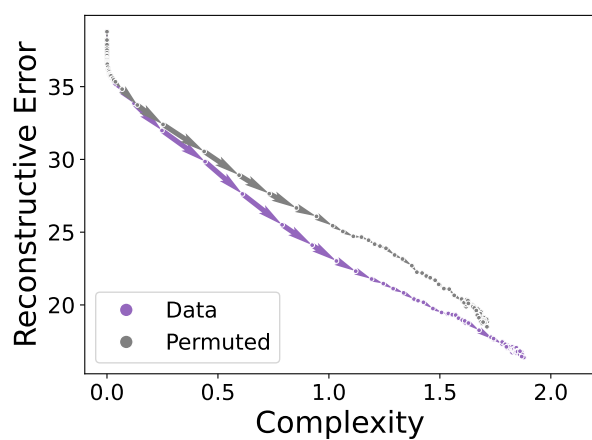

(a) Learning Space

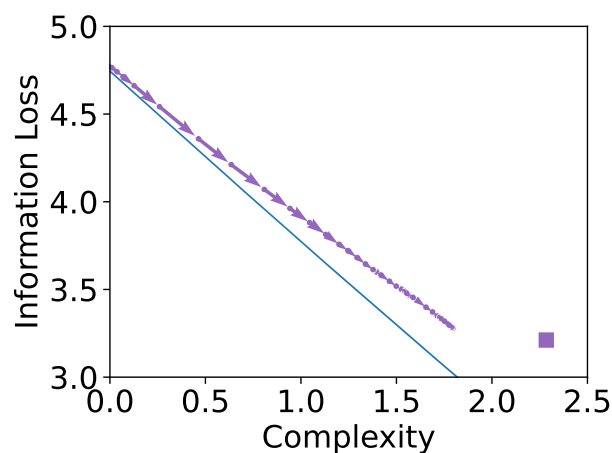

(b) Communicative Space

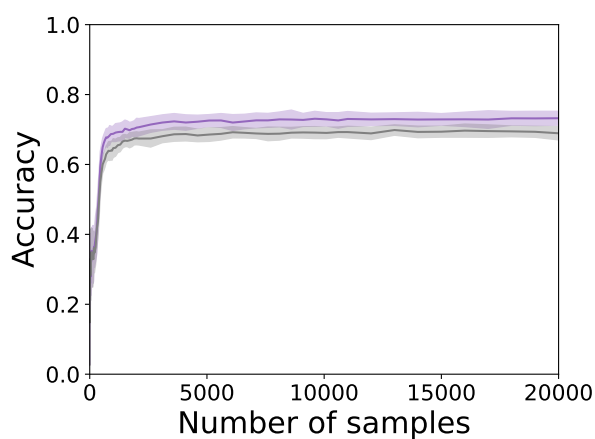

(c) Accuracy

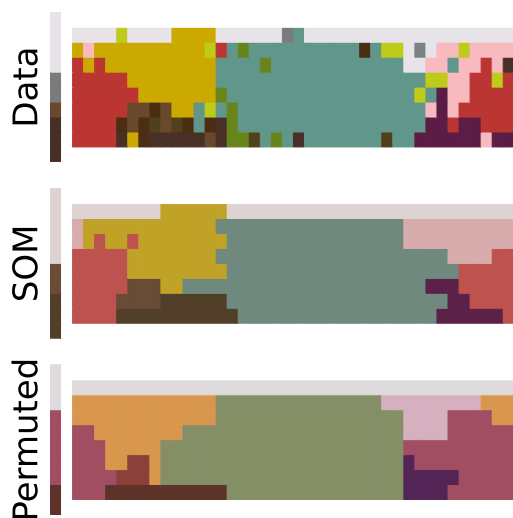

(d) Mode Maps

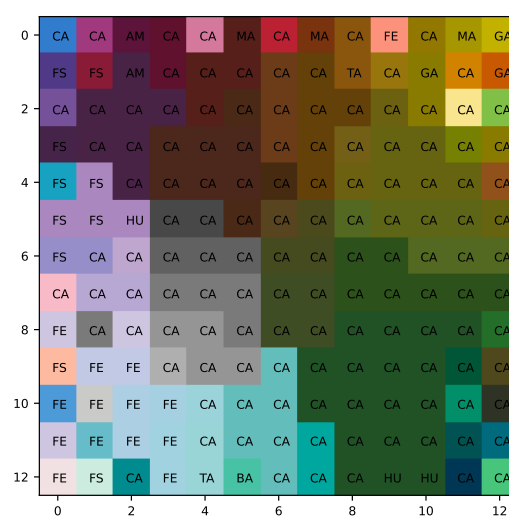

(e) Learnt SOM Cells

1.87. *Sirionó*;  $|\mathcal{W}| = 14$

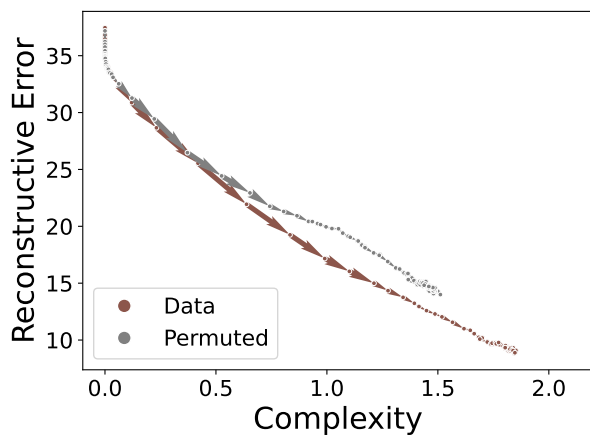

(a) Learning Space

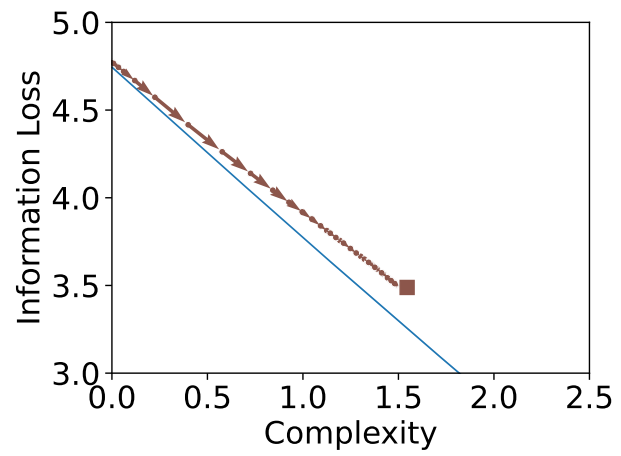

(b) Communicative Space

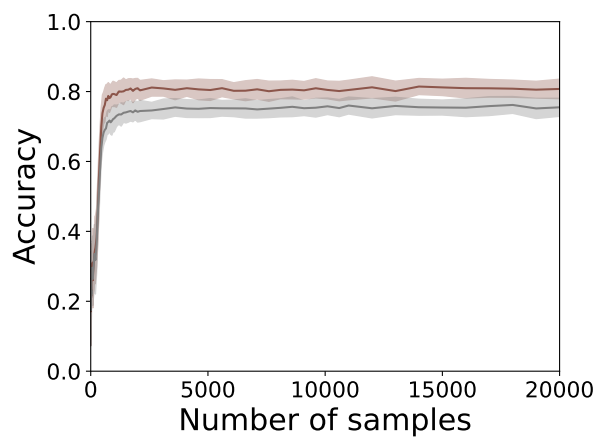

(c) Accuracy

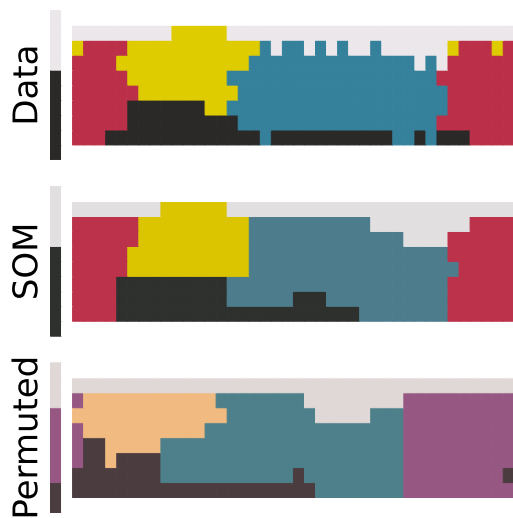

(d) Mode Maps

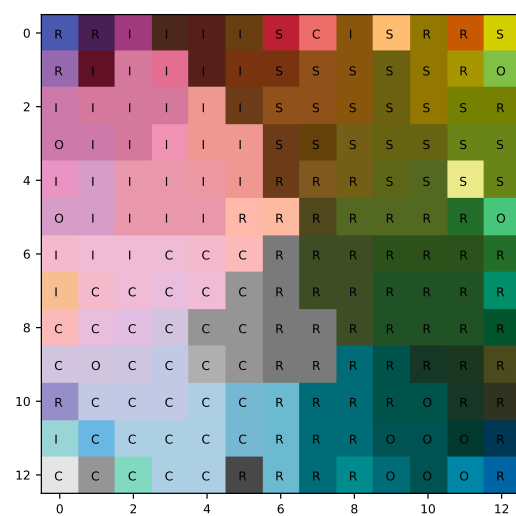

(e) Learnt SOM Cells

1.88. Slave;  $|\mathcal{W}| = 48$

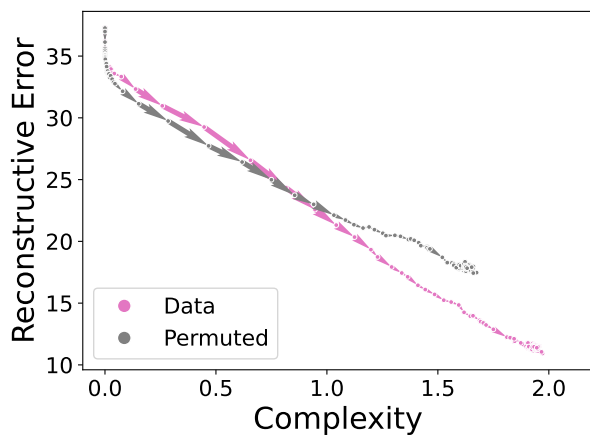

(a) Learning Space

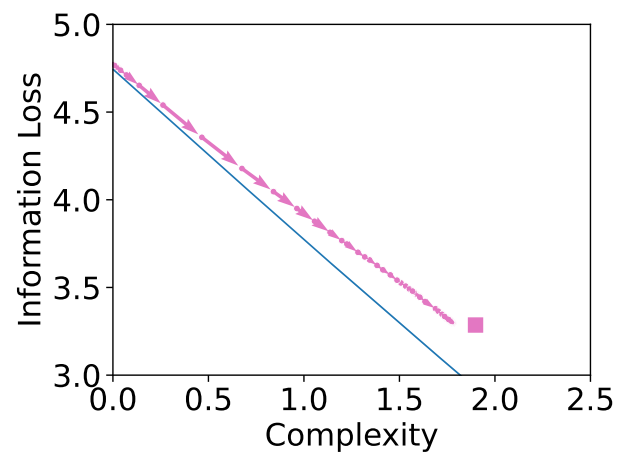

(b) Communicative Space

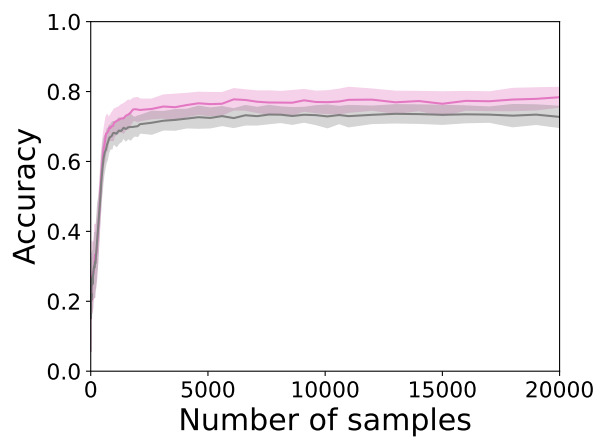

(c) Accuracy

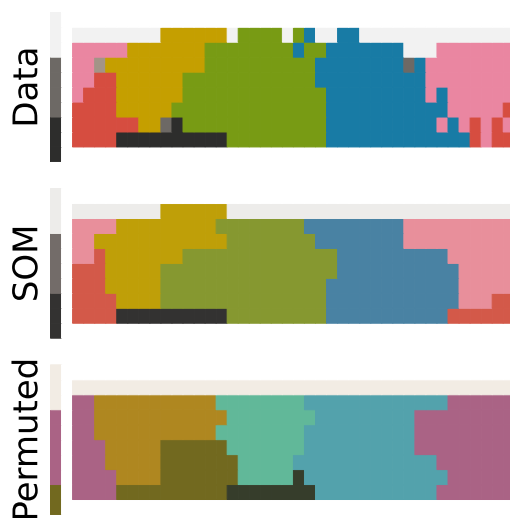

(d) Mode Maps

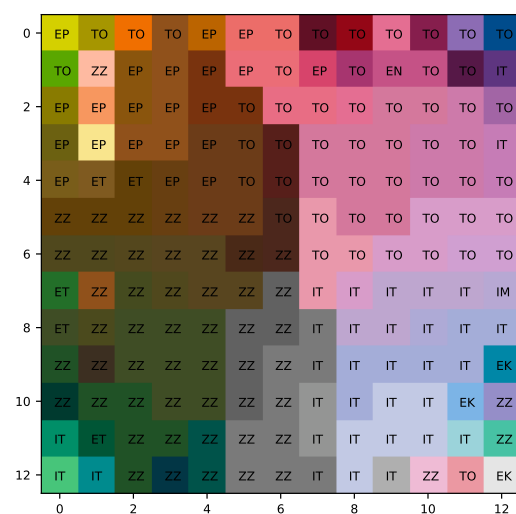

(e) Learnt SOM Cells

### 1.89. Sursurunga; $|\mathcal{W}| = 12$

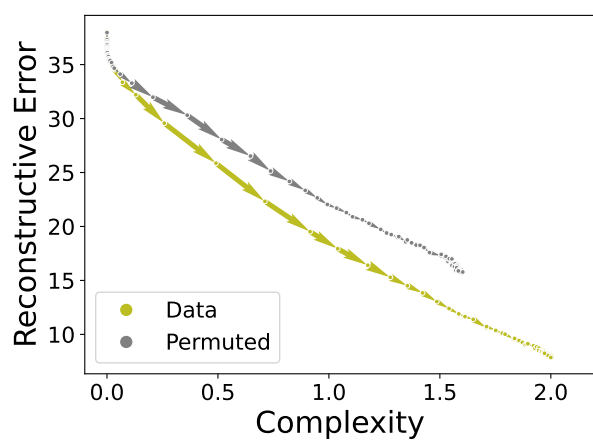

(a) Learning Space

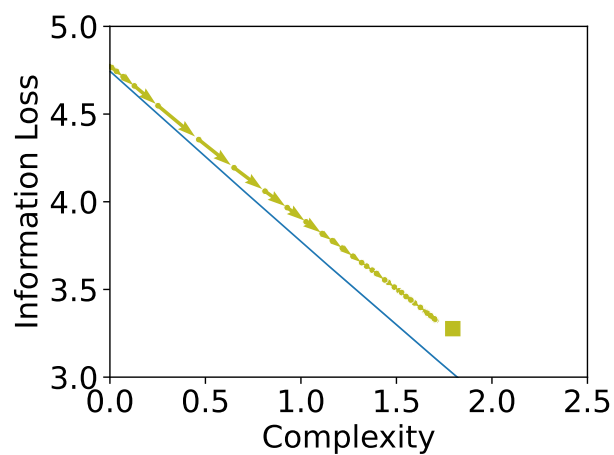

(b) Communicative Space

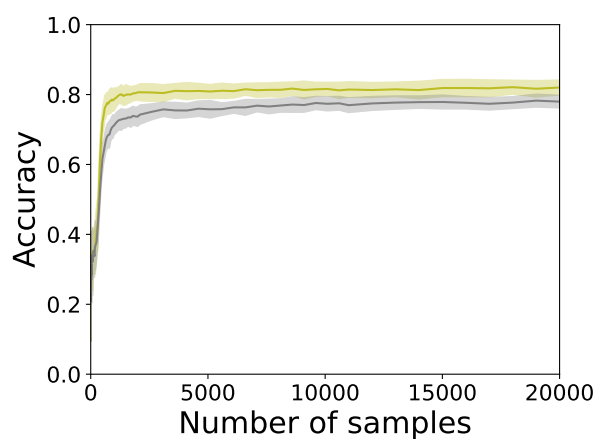

(c) Accuracy

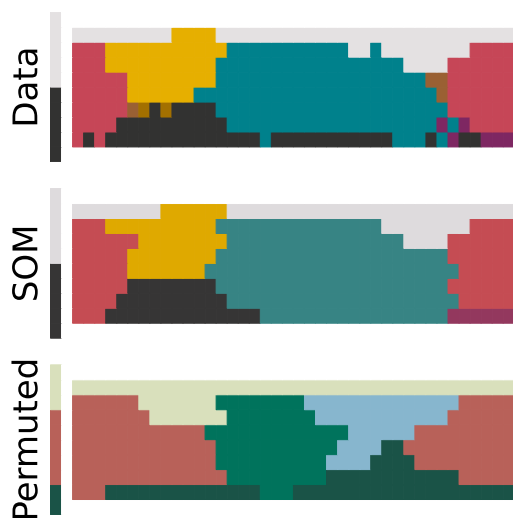

(d) Mode Maps

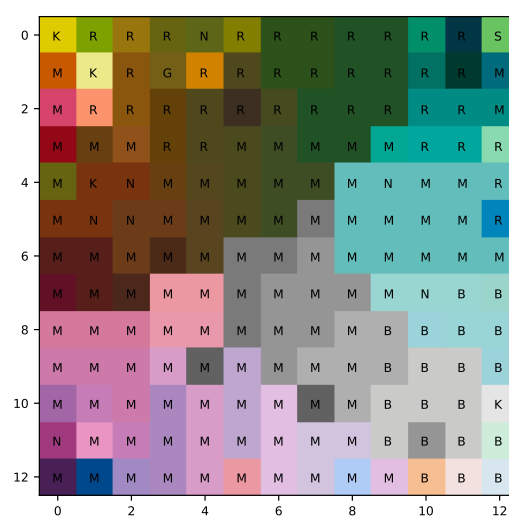

(e) Learnt SOM Cells

1.90. Tabla;  $|\mathcal{W}| = 8$

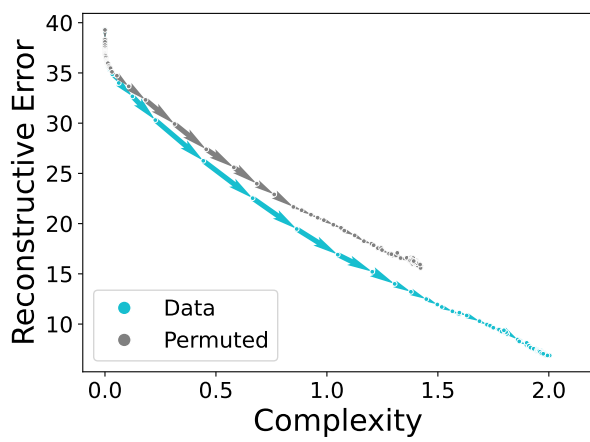

(a) Learning Space

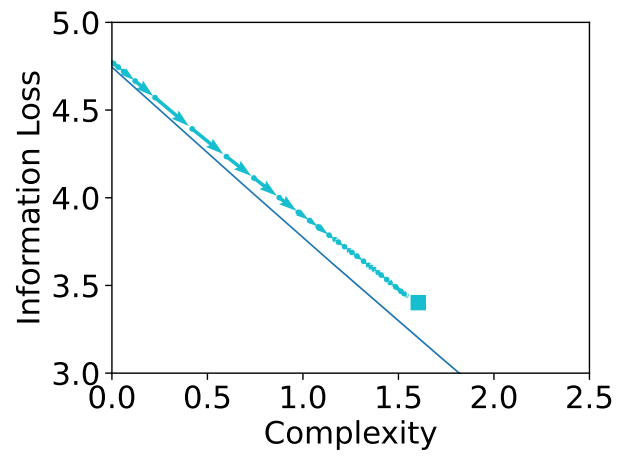

(b) Communicative Space

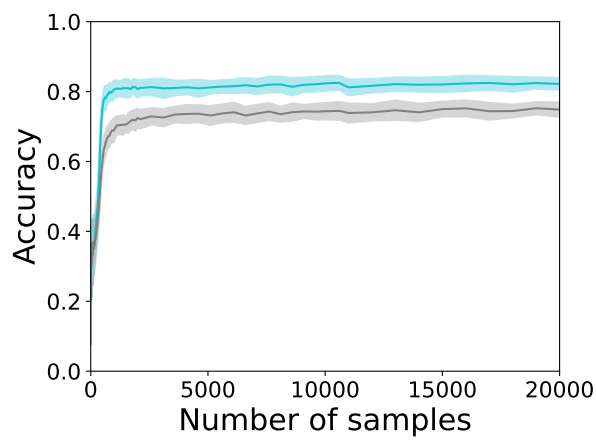

(c) Accuracy

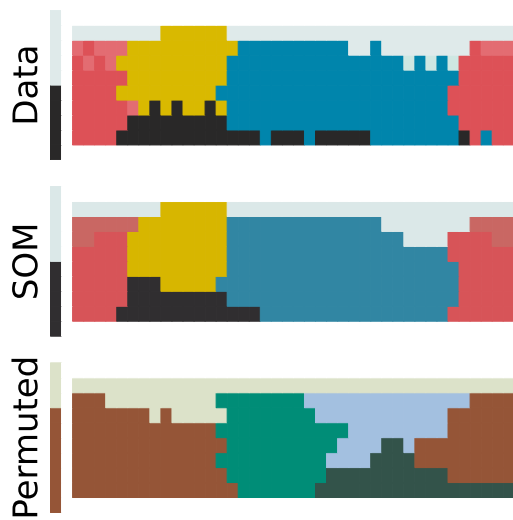

(d) Mode Maps

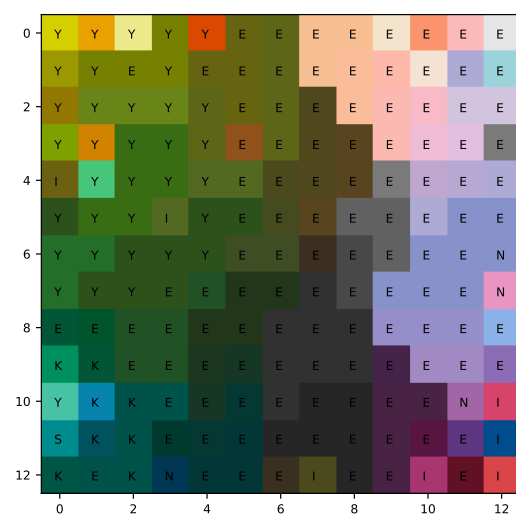

(e) Learnt SOM Cells

1.91. Tacana;  $|\mathcal{W}| = 32$

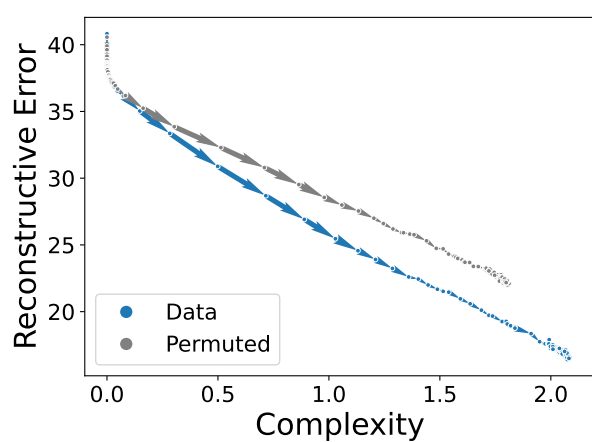

(a) Learning Space

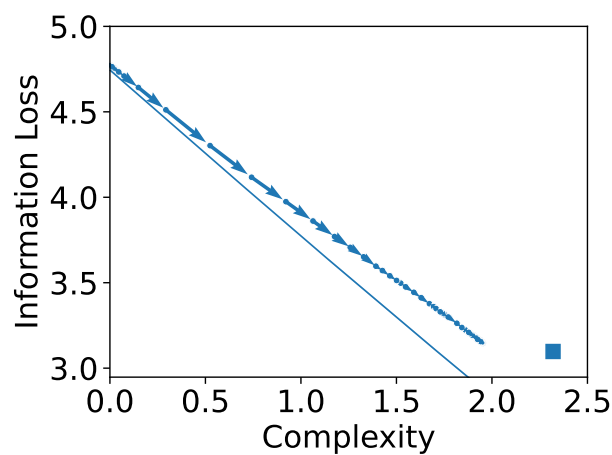

(b) Communicative Space

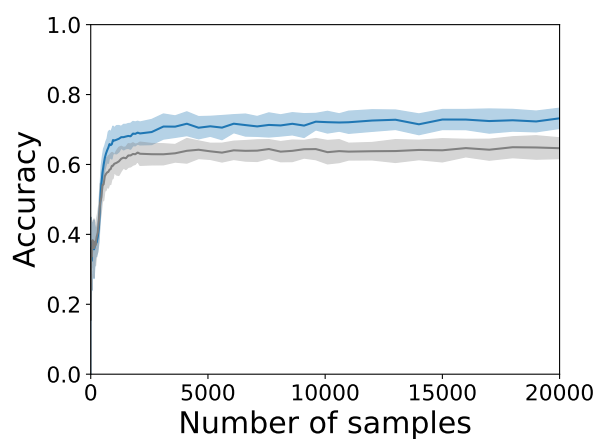

(c) Accuracy

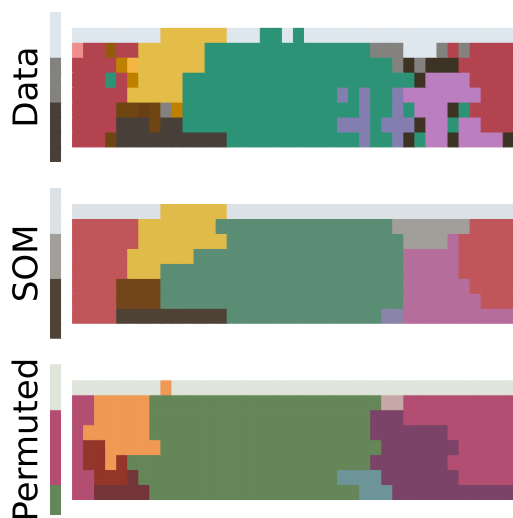

(d) Mode Maps

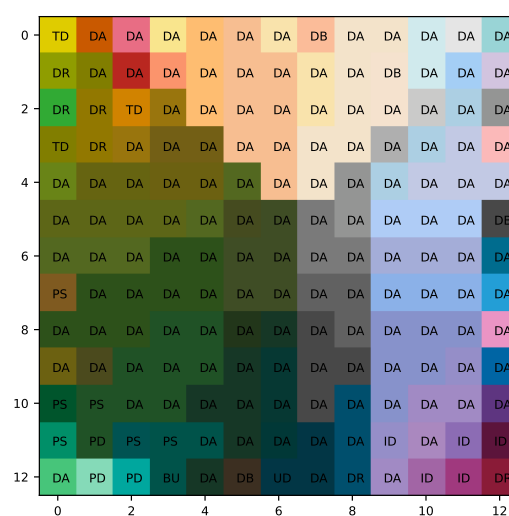

(e) Learnt SOM Cells



1.92. *Central Tarahumara*;  $|\mathcal{W}| = 21$

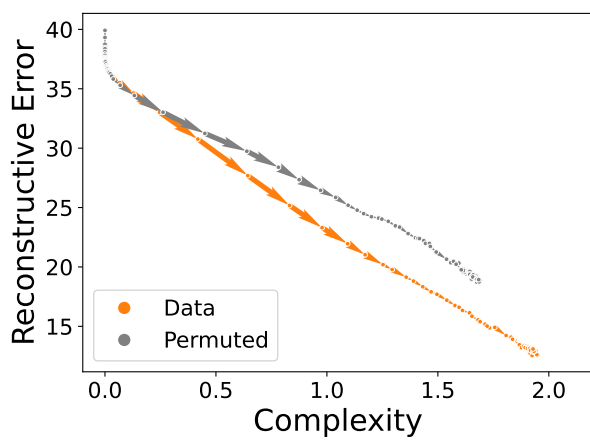

(a) Learning Space

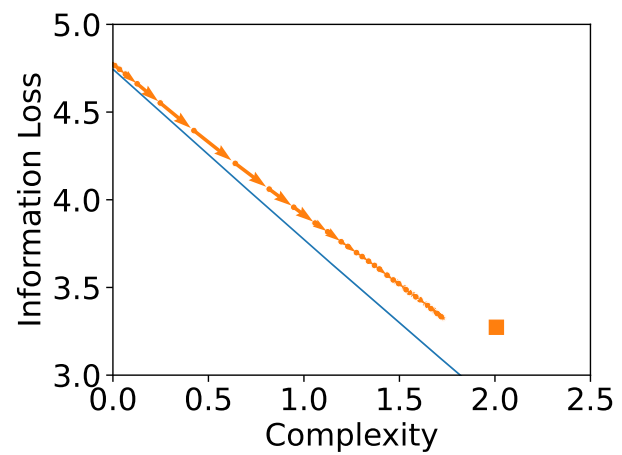

### (b) Communicative Space

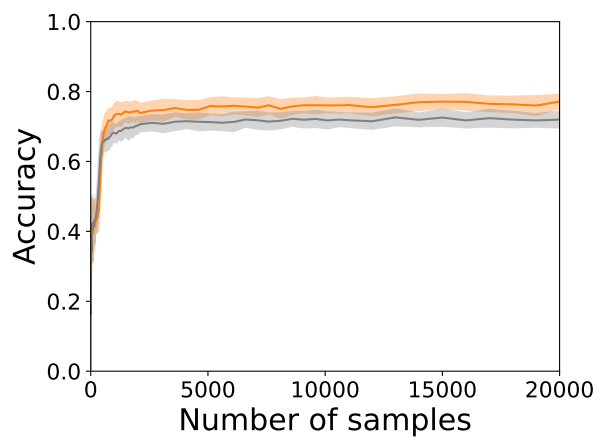

### (c) Accuracy

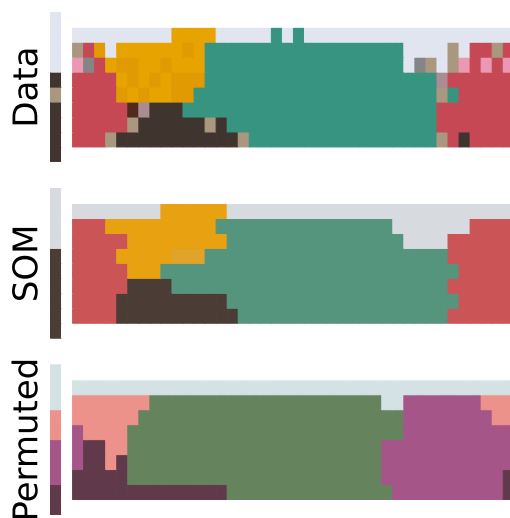

(d) Mode Maps

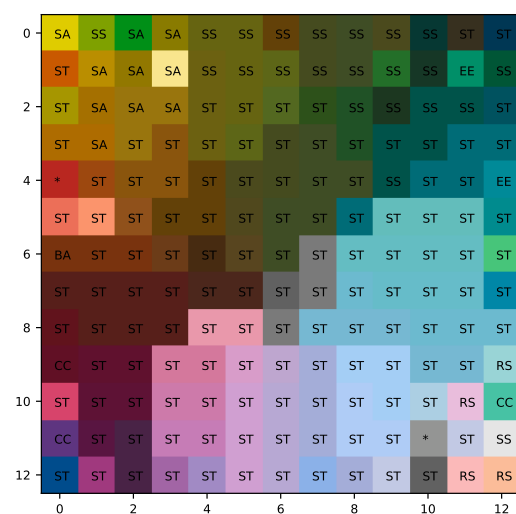

(e) Learnt SOM Cells

1.93. *W. Tarahumara*;  $|\mathcal{W}| = 11$

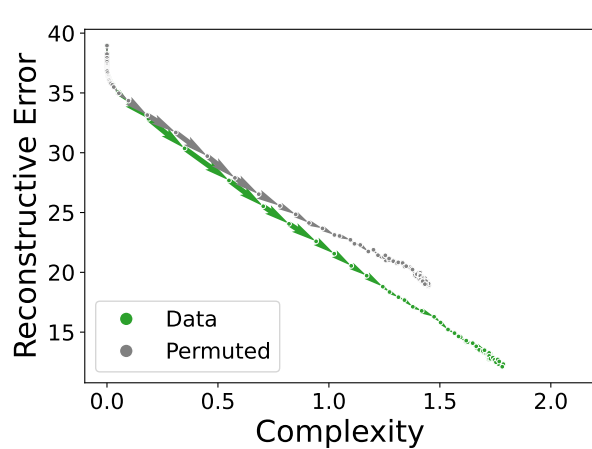

(a) Learning Space

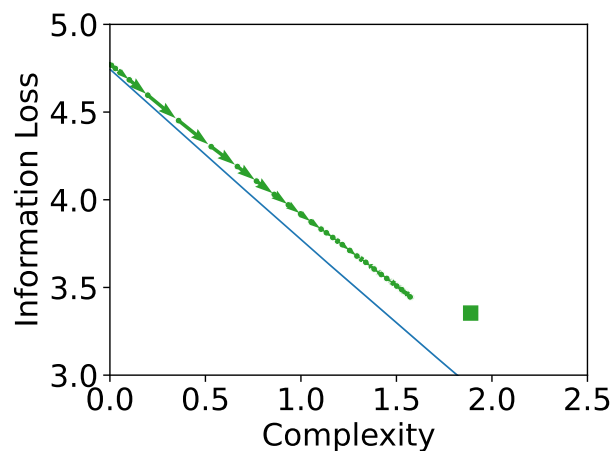

(b) Communicative Space

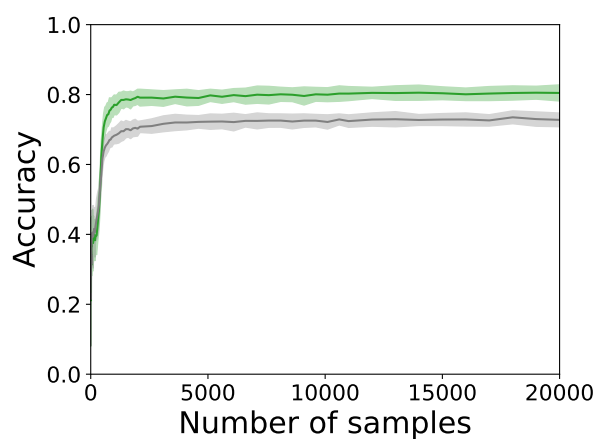

(c) Accuracy

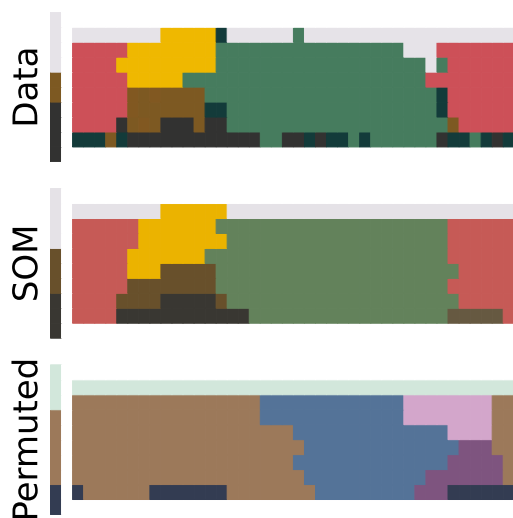

(d) Mode Maps

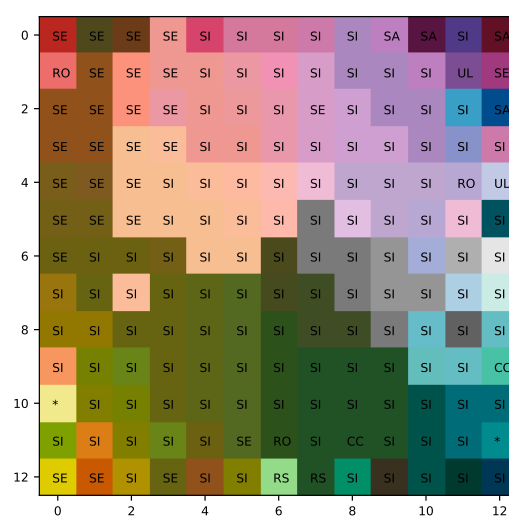

(e) Learnt SOM Cells

1.94.  $T_{boli}$ ;  $|\mathcal{W}| = 10$

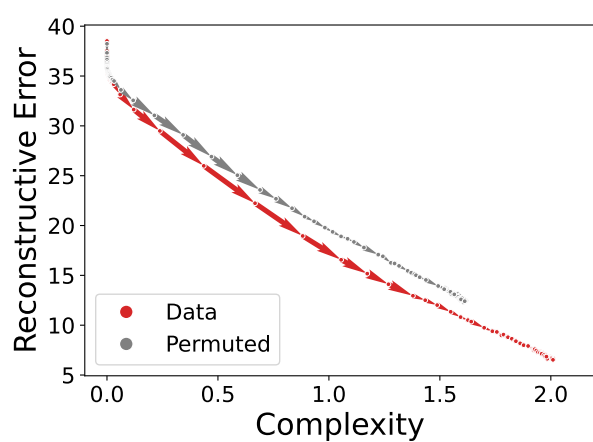

(a) Learning Space

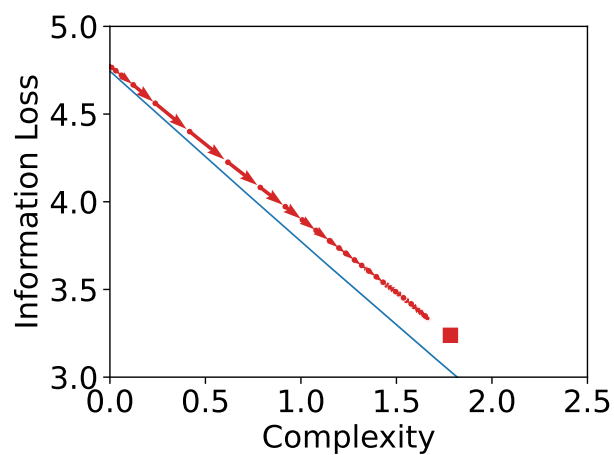

(b) Communicative Space

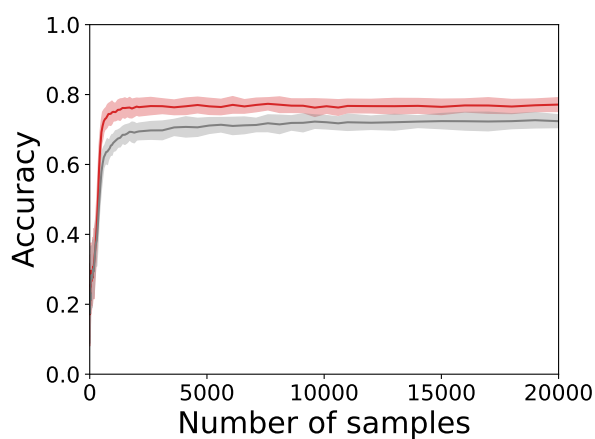

(c) Accuracy

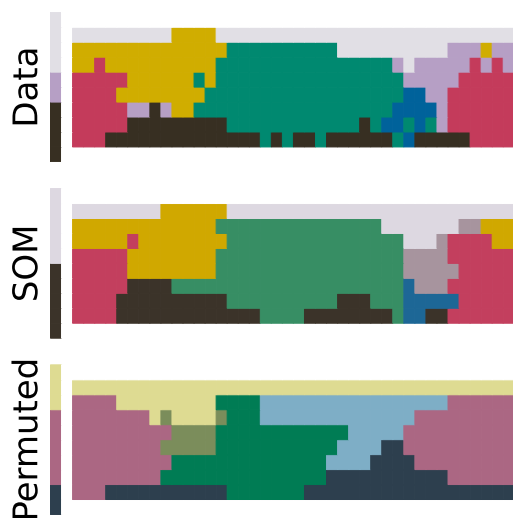

(d) Mode Maps

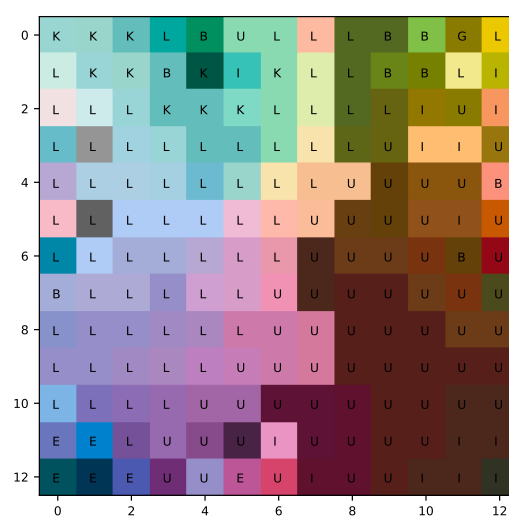

(e) Learnt SOM Cells

1.95. Teribe;  $|\mathcal{W}| = 22$

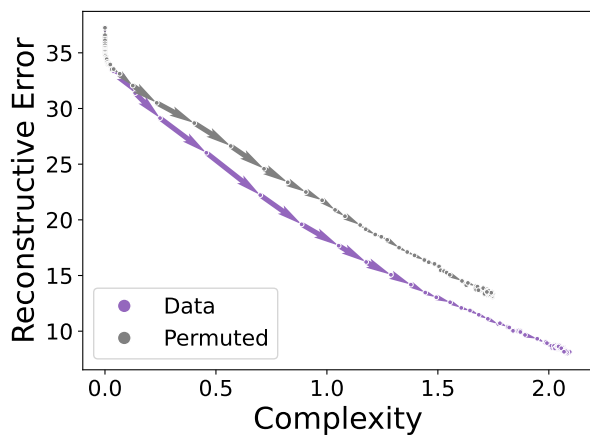

(a) Learning Space

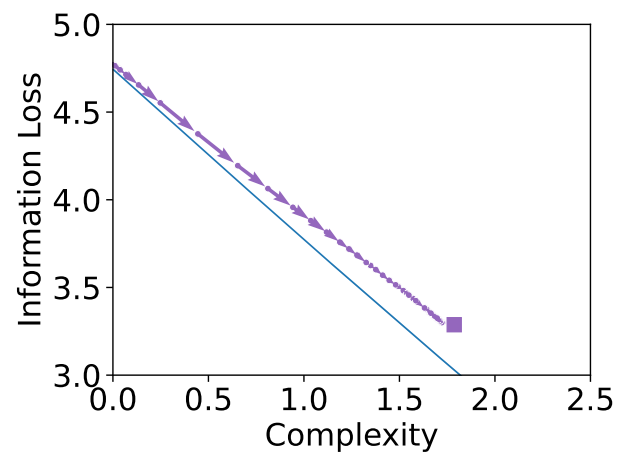

(b) Communicative Space

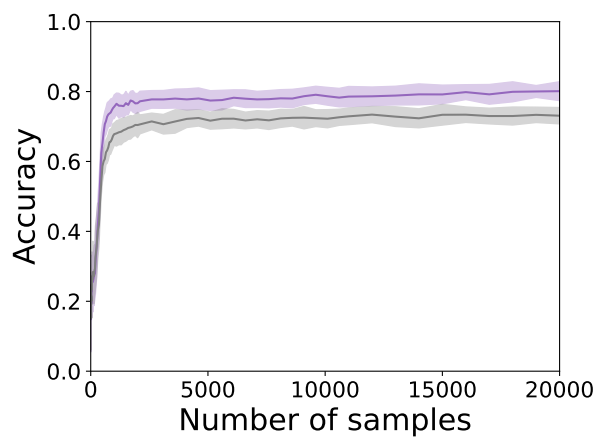

(c) Accuracy

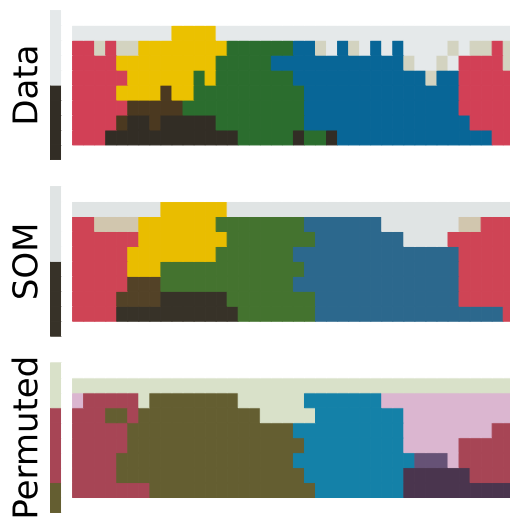

(d) Mode Maps

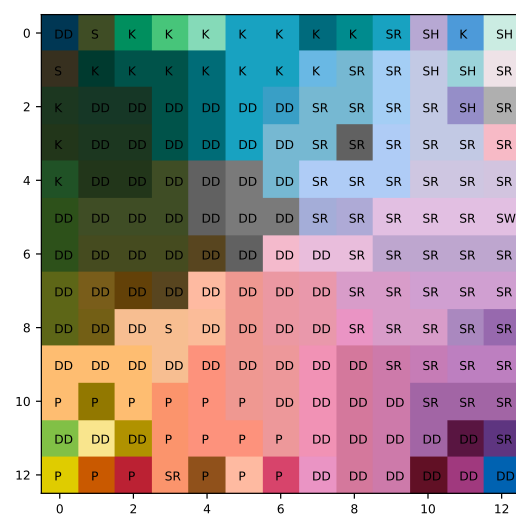

(e) Learnt SOM Cells

1.96. Ticuna;  $|\mathcal{W}| = 11$

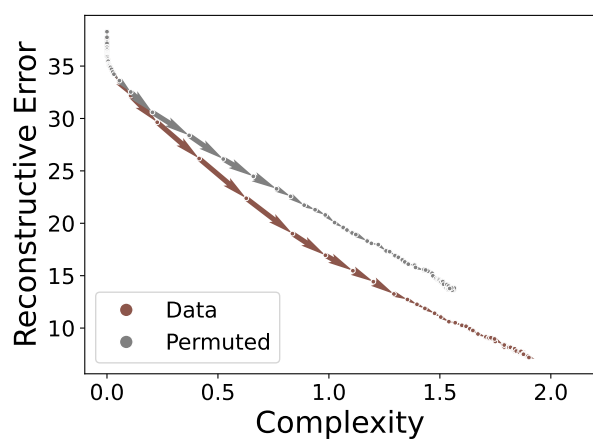

(a) Learning Space

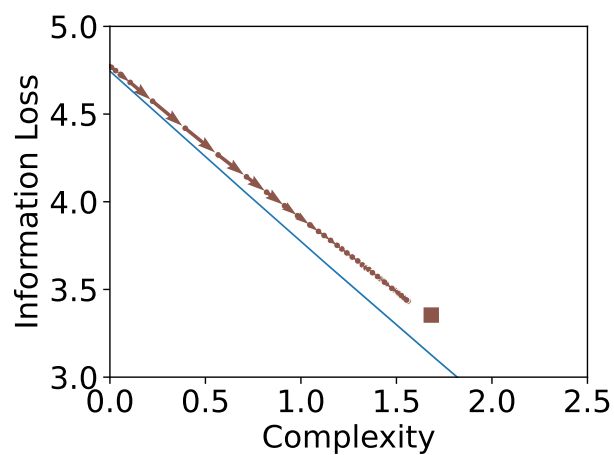

(b) Communicative Space

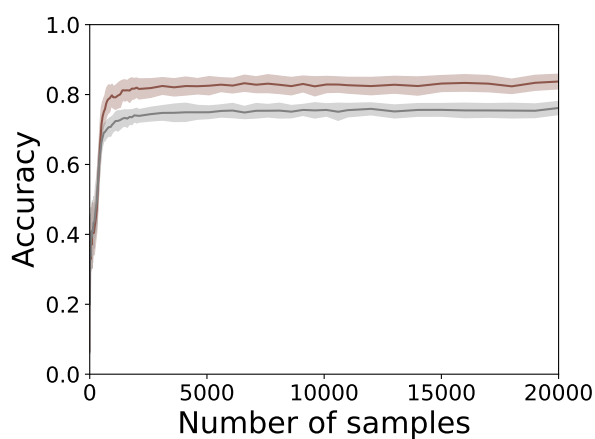

(c) Accuracy

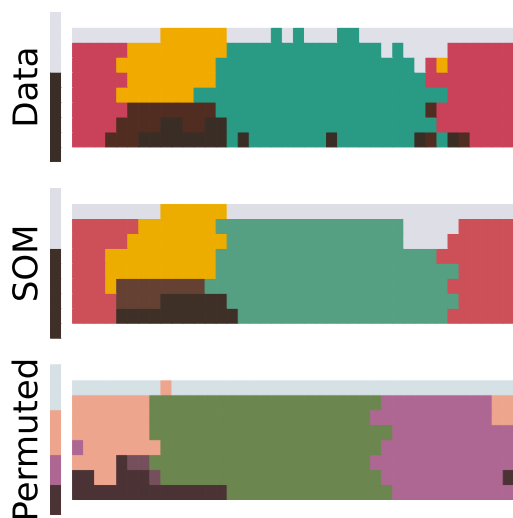

(d) Mode Maps

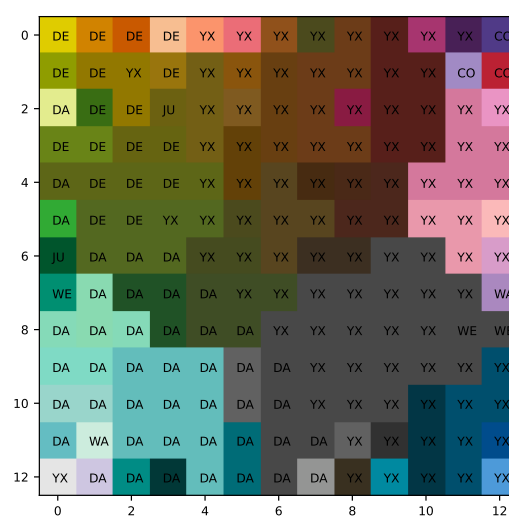

(e) Learnt SOM Cells

1.97. Tifal;  $|\mathcal{W}| = 25$

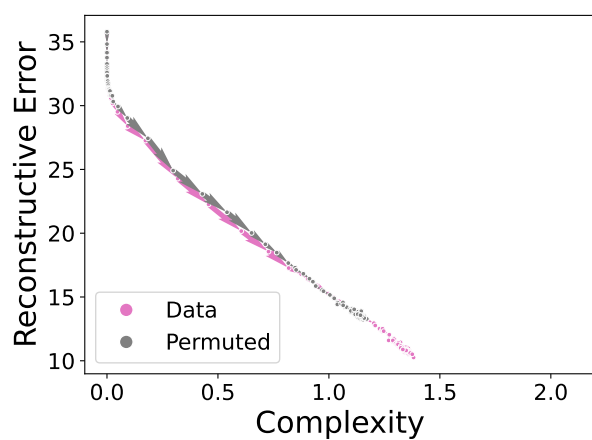

(a) Learning Space

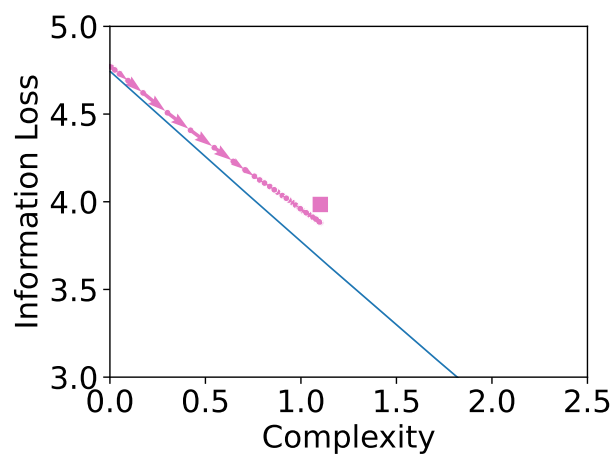

(b) Communicative Space

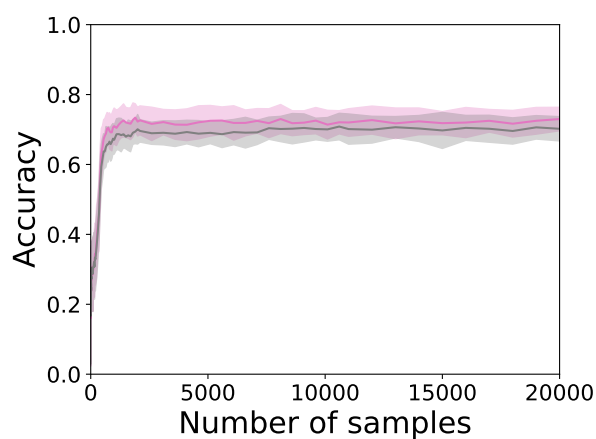

(c) Accuracy

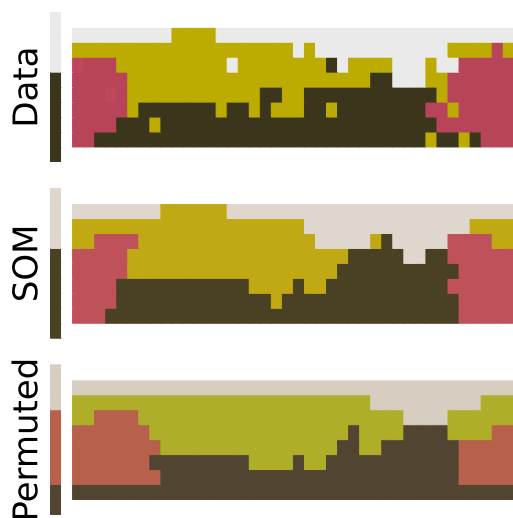

(d) Mode Maps

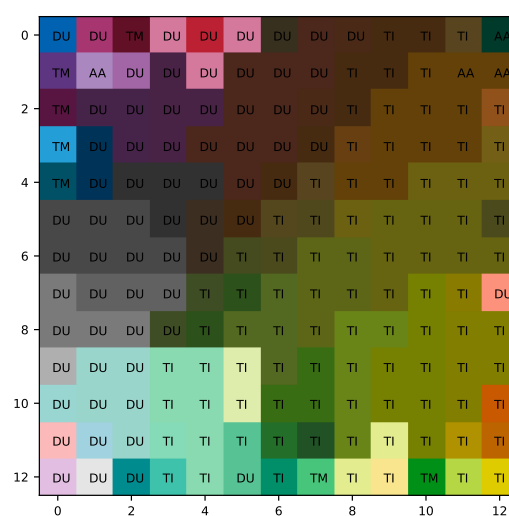

(e) Learnt SOM Cells

1.98. Tlapaneco;  $|\mathcal{W}| = 14$

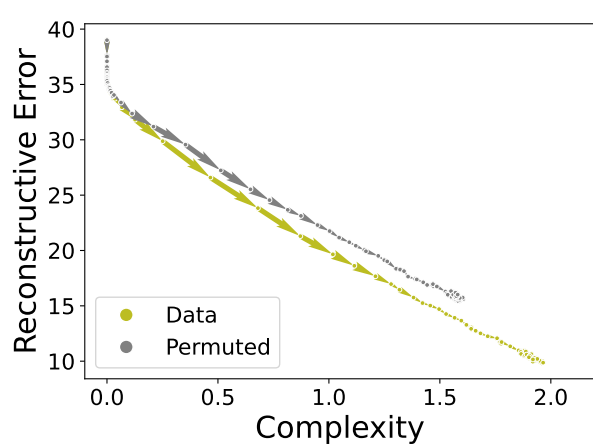

(a) Learning Space

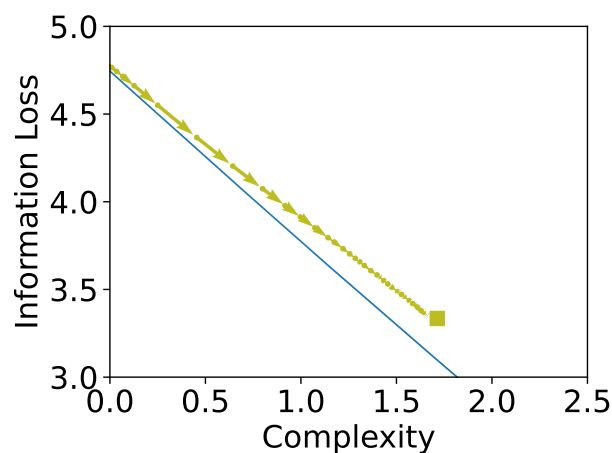

(b) Communicative Space

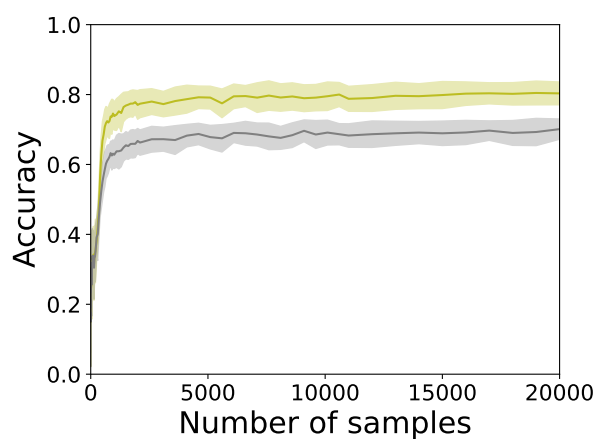

(c) Accuracy

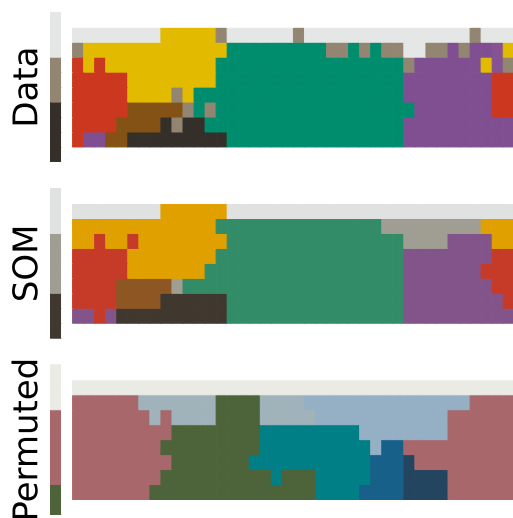

(d) Mode Maps

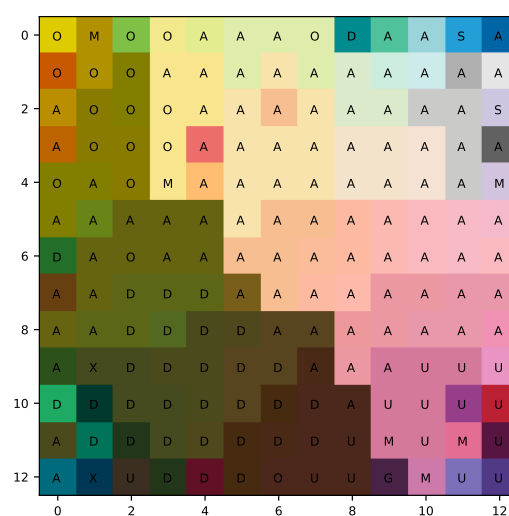

(e) Learnt SOM Cells

1.99. Tucano;  $|\mathcal{W}| = 7$

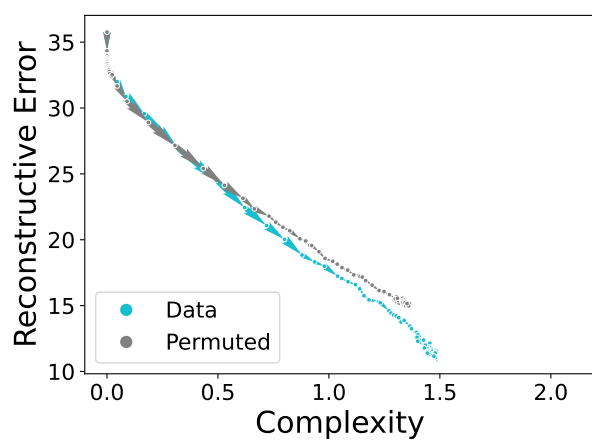

(a) Learning Space

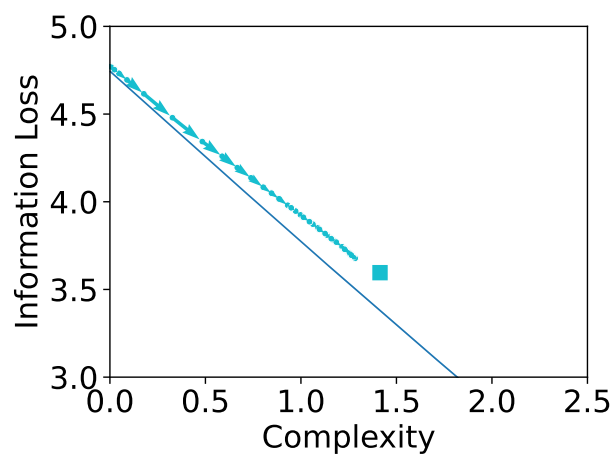

(b) Communicative Space

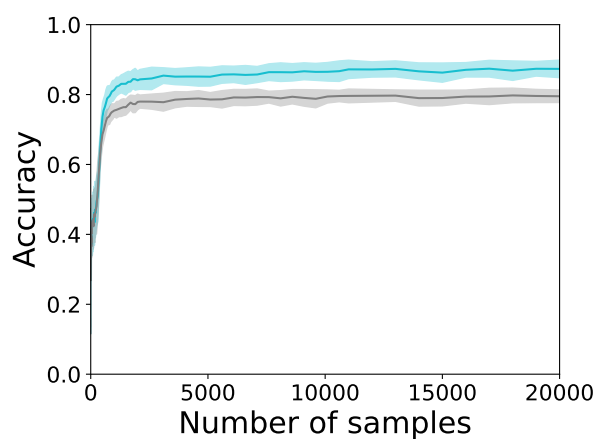

(c) Accuracy

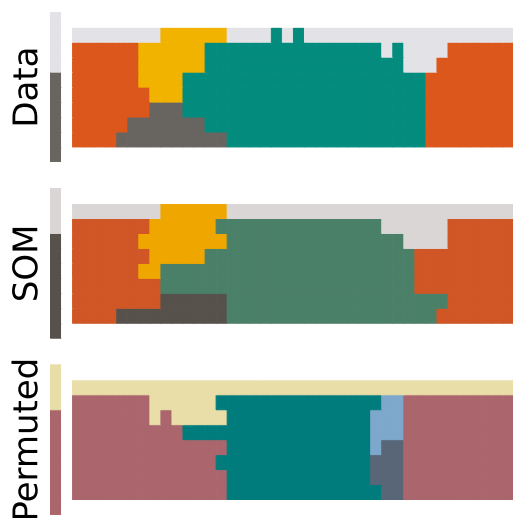

(d) Mode Maps

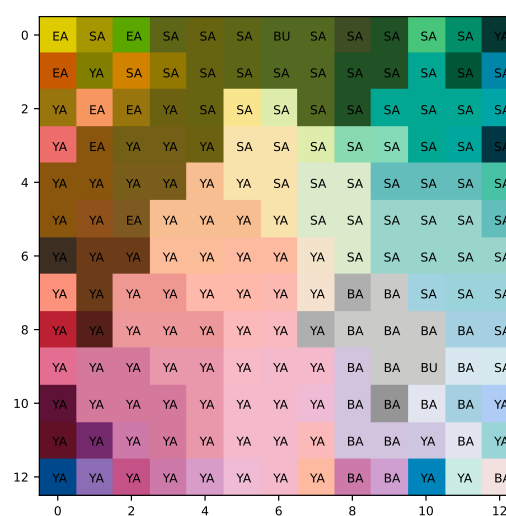

(e) Learnt SOM Cells



1.100. *Vagla*;  $|\mathcal{W}| = 7$

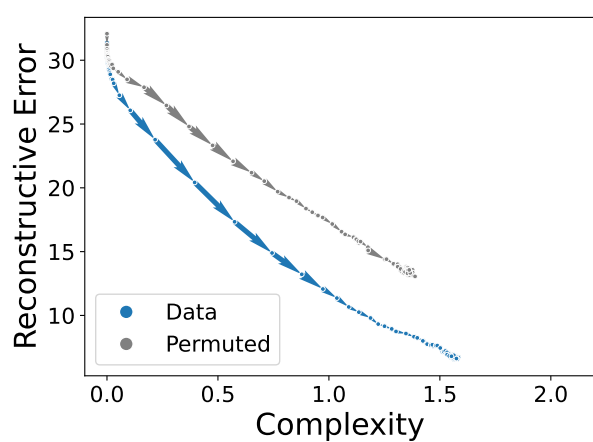

(a) Learning Space

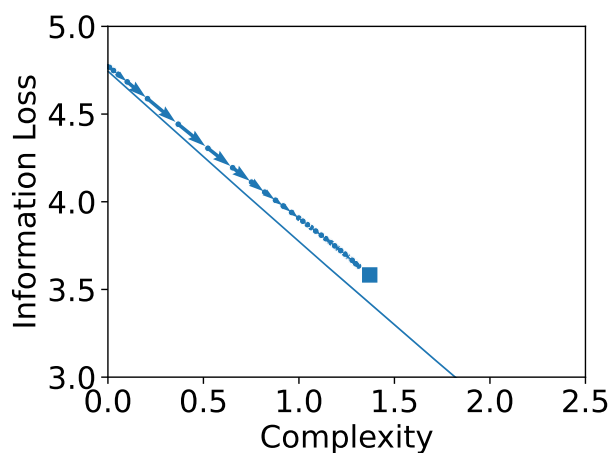

(b) Communicative Space

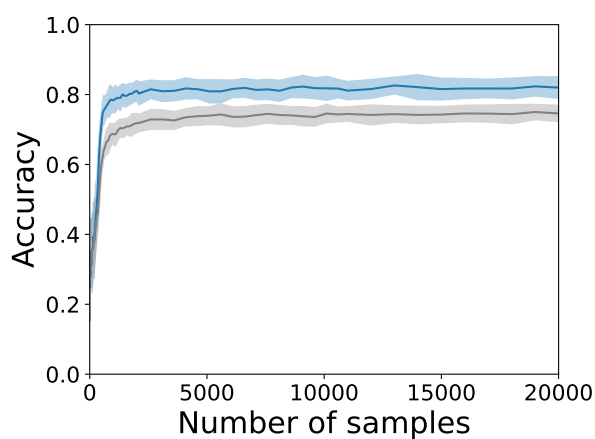

(c) Accuracy

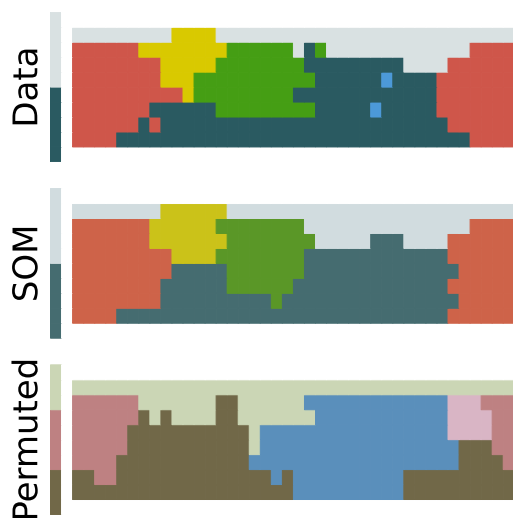

(d) Mode Maps

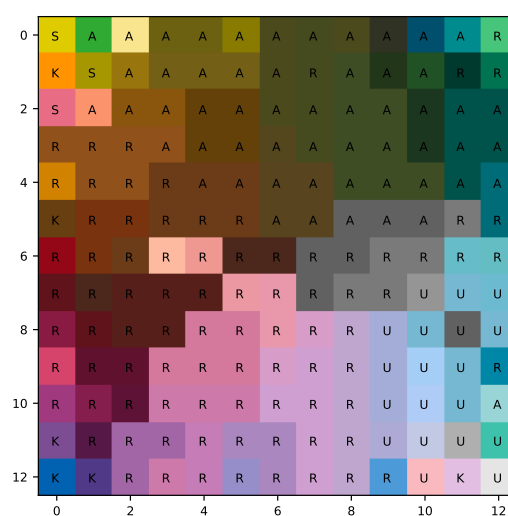

(e) Learnt SOM Cells

1.101. Vasavi;  $|\mathcal{W}| = 11$

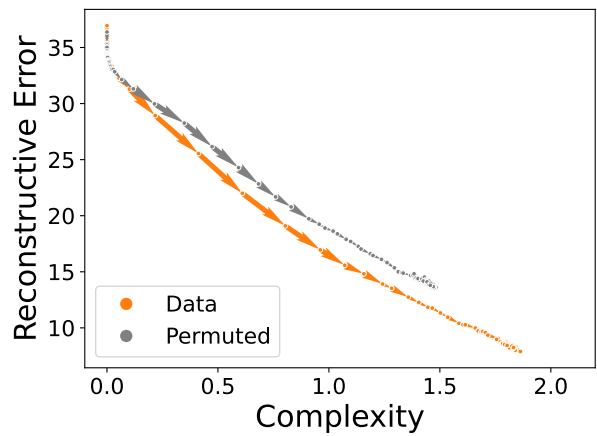

(a) Learning Space

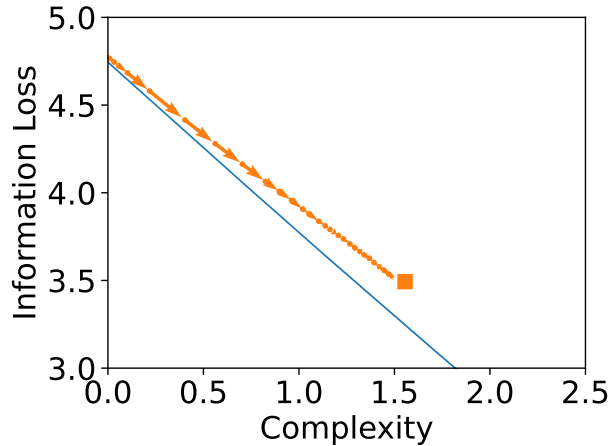

(b) Communicative Space

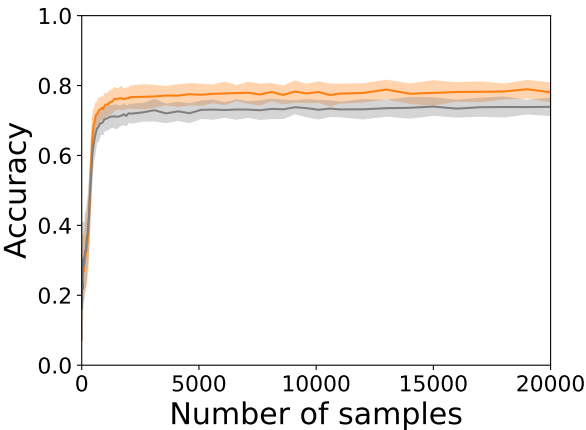

(c) Accuracy

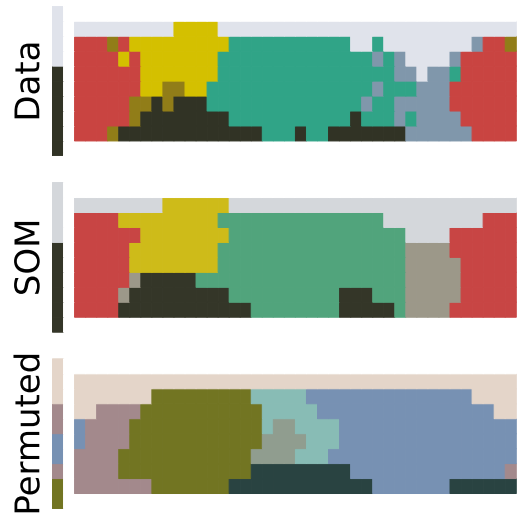

(d) Mode Maps

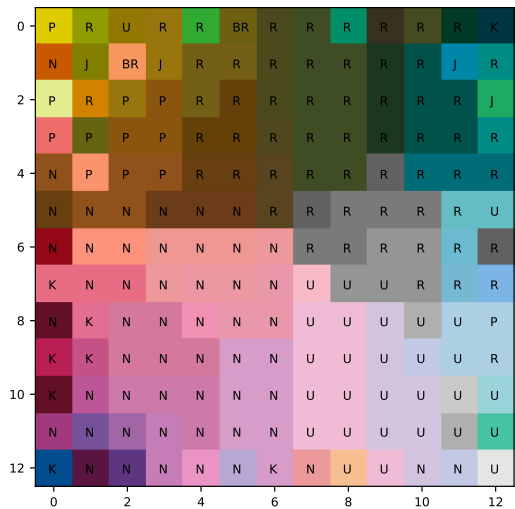

(e) Learnt SOM Cells

1.102. Waorani;  $|\mathcal{W}| = 19$

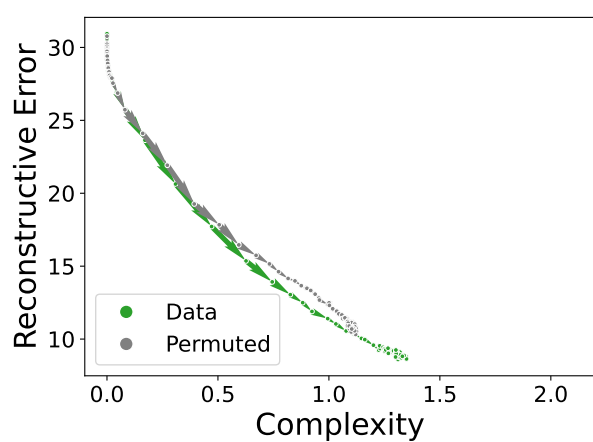

(a) Learning Space

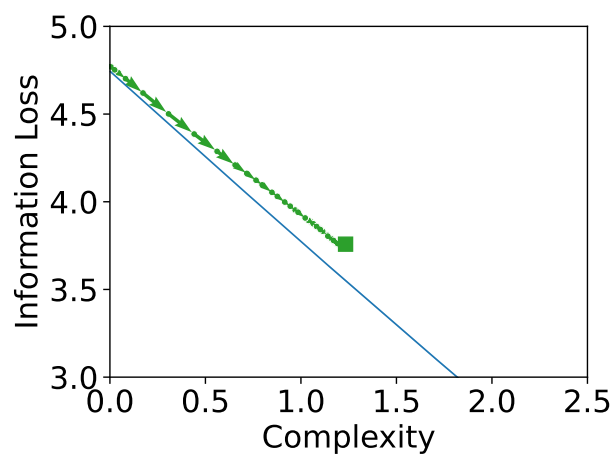

(b) Communicative Space

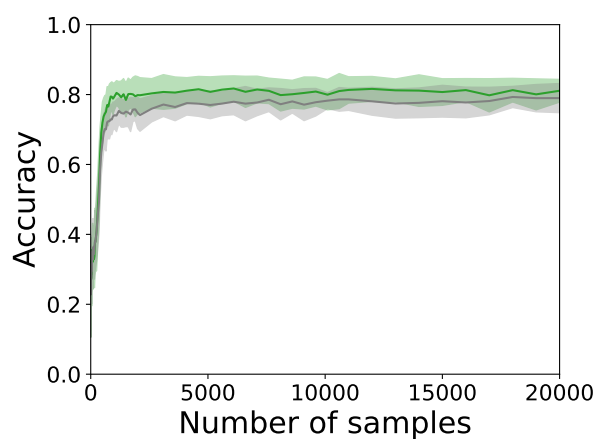

(c) Accuracy

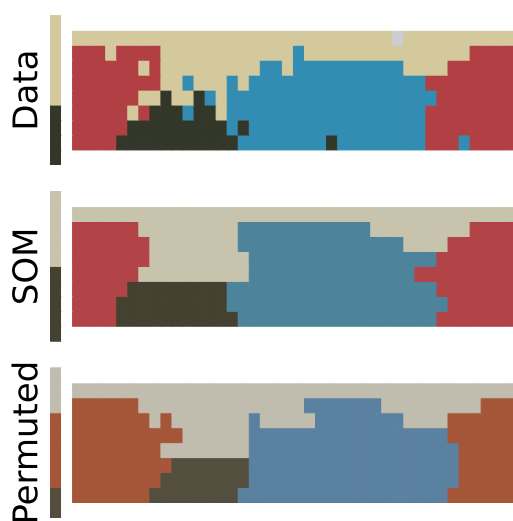

(d) Mode Maps

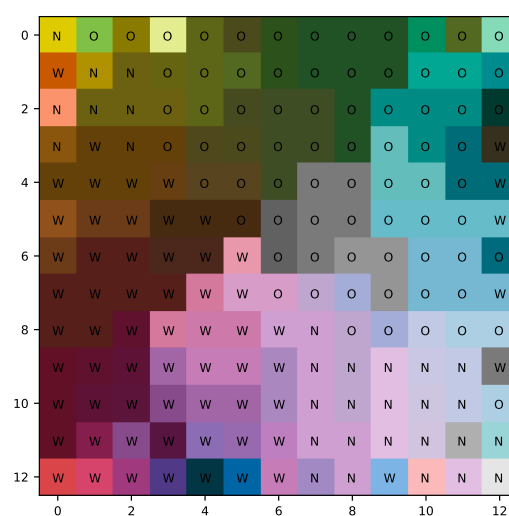

(e) Learnt SOM Cells

1.103. Walpiri;  $|\mathcal{W}| = 63$

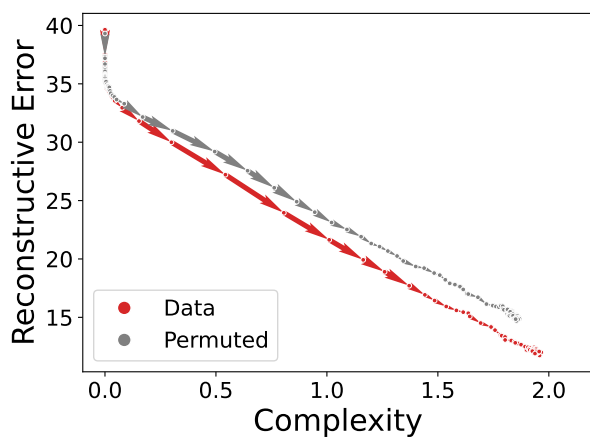

(a) Learning Space

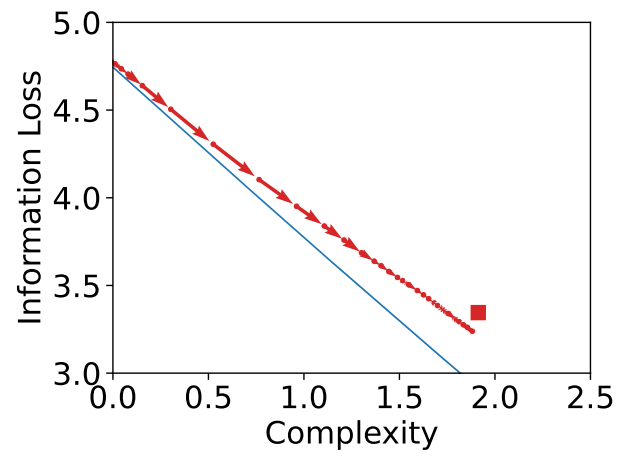

(b) Communicative Space

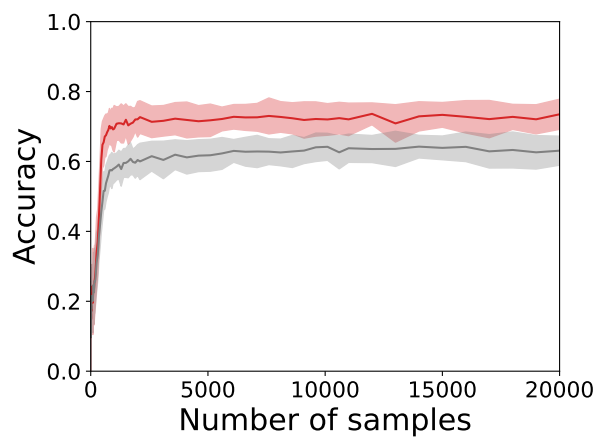

(c) Accuracy

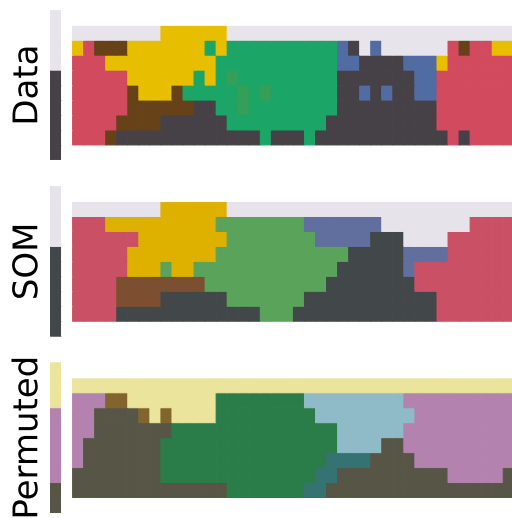

(d) Mode Maps

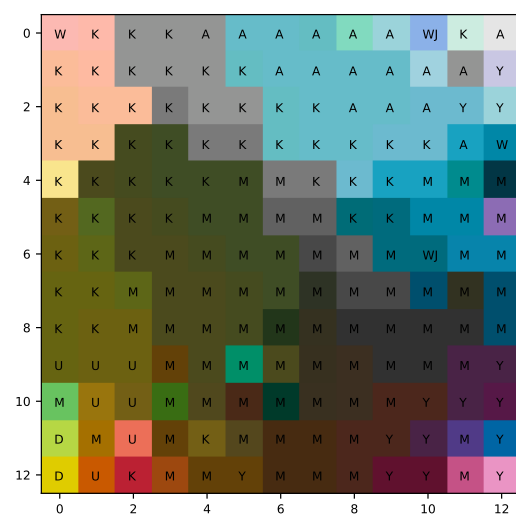

(e) Learnt SOM Cells

1.104. Wobe;  $|\mathcal{W}| = 6$

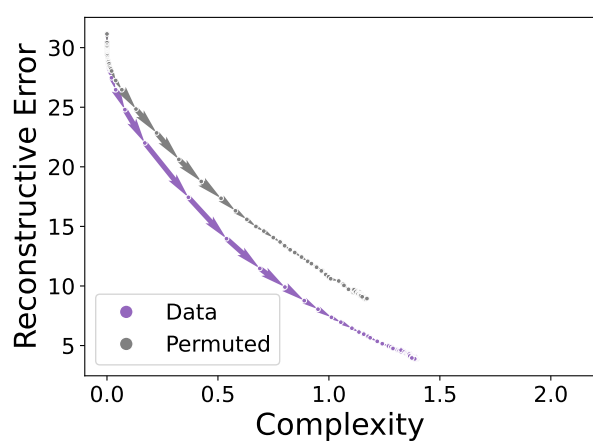

(a) Learning Space

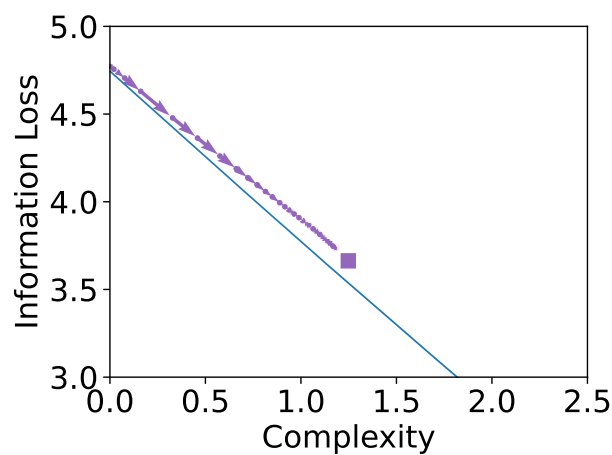

(b) Communicative Space

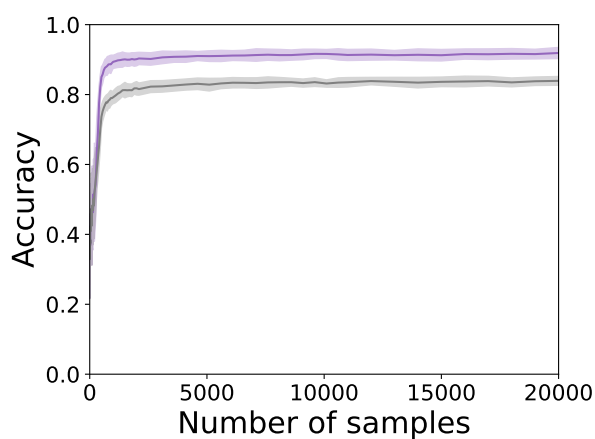

(c) Accuracy

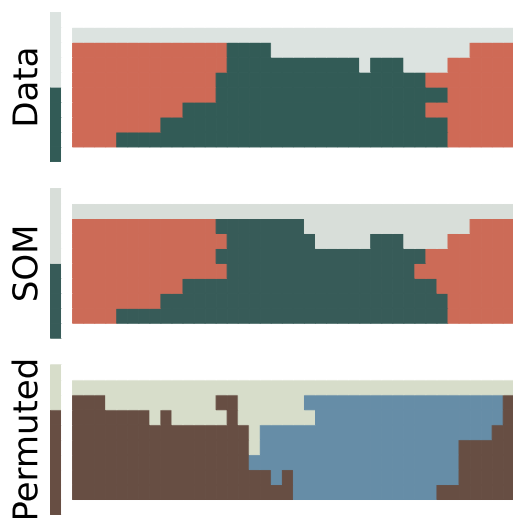

(d) Mode Maps

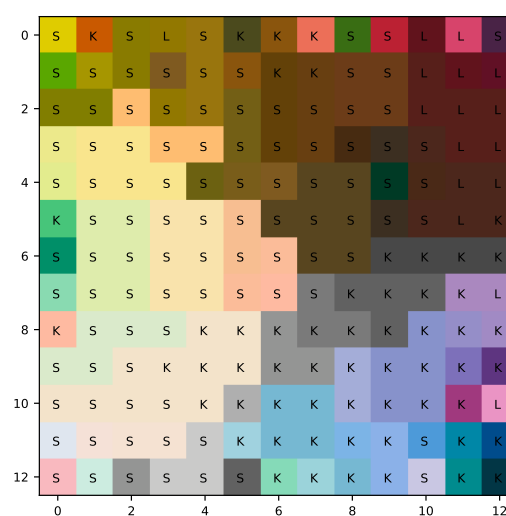

(e) Learnt SOM Cells

1.105. Yacouba;  $|\mathcal{W}| = 4$

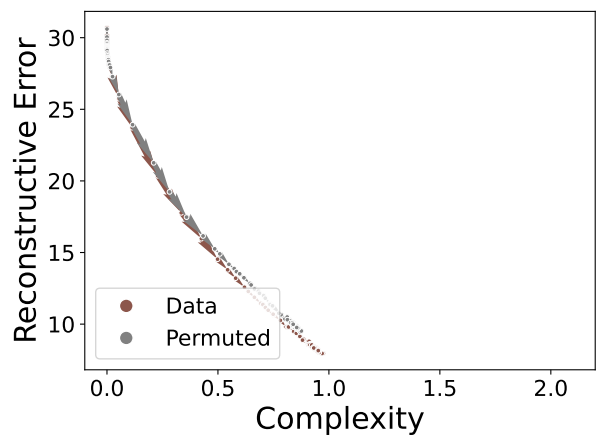

(a) Learning Space

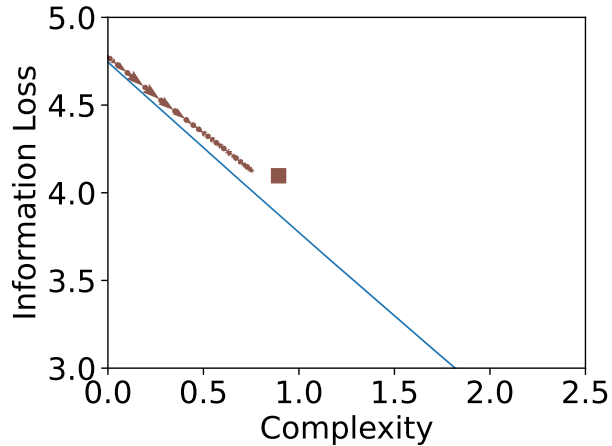

(b) Communicative Space

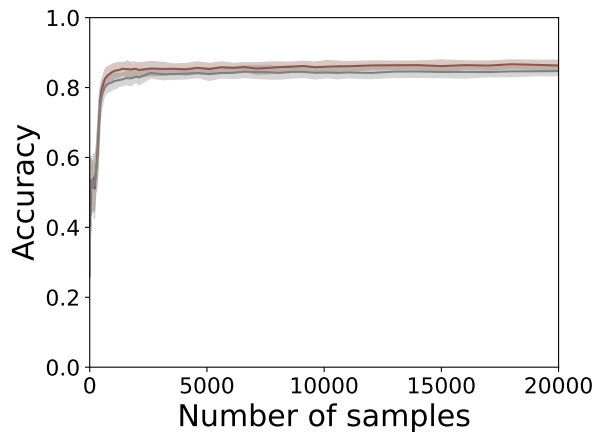

(c) Accuracy

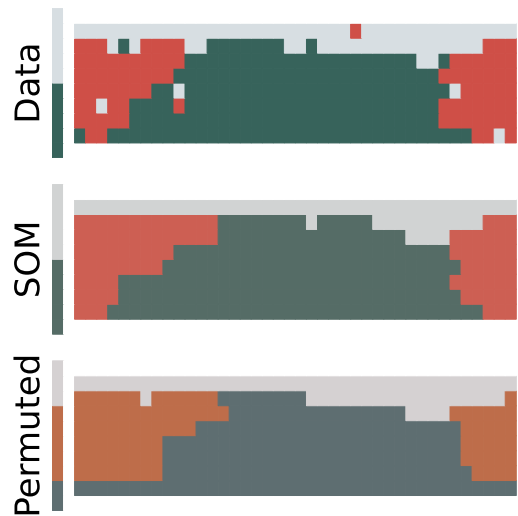

(d) Mode Maps

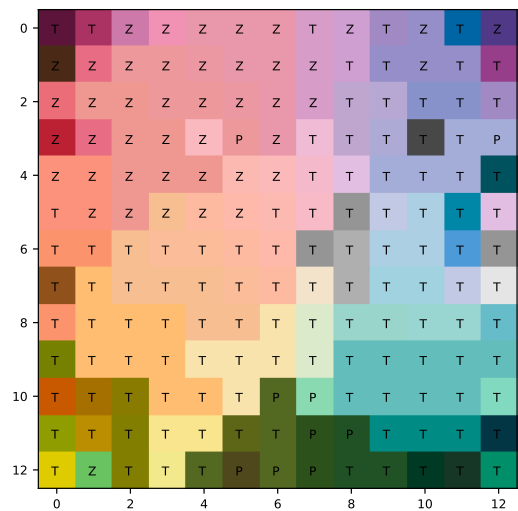

(e) Learnt SOM Cells

1.106. Yakan;  $|\mathcal{W}| = 14$

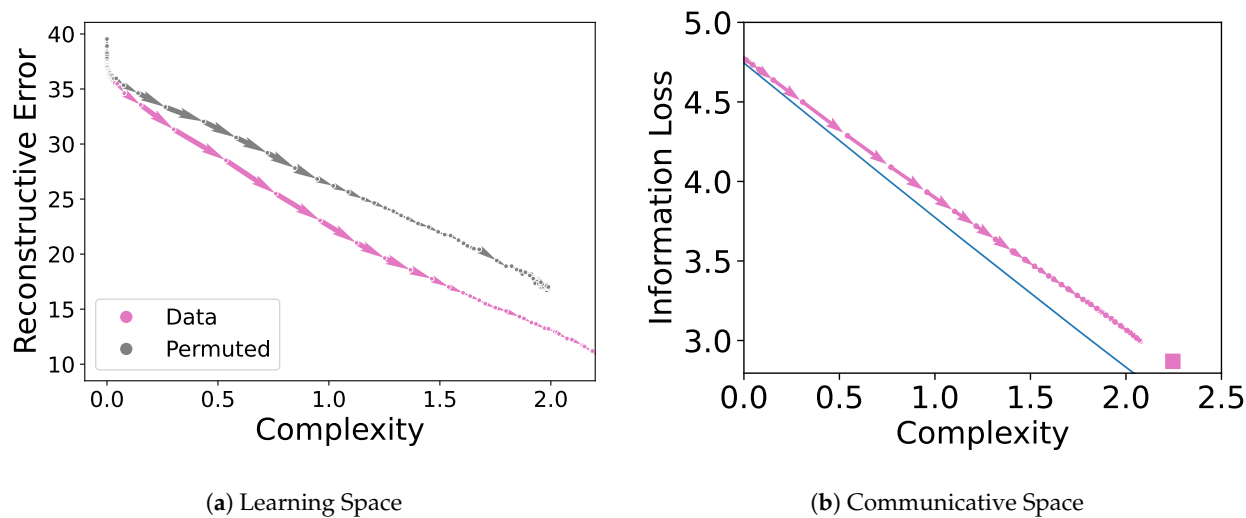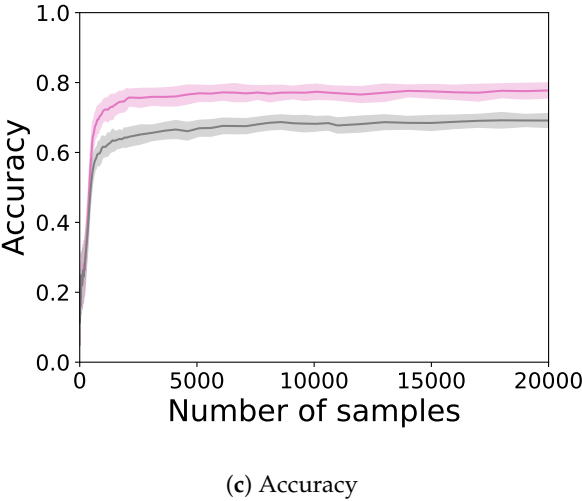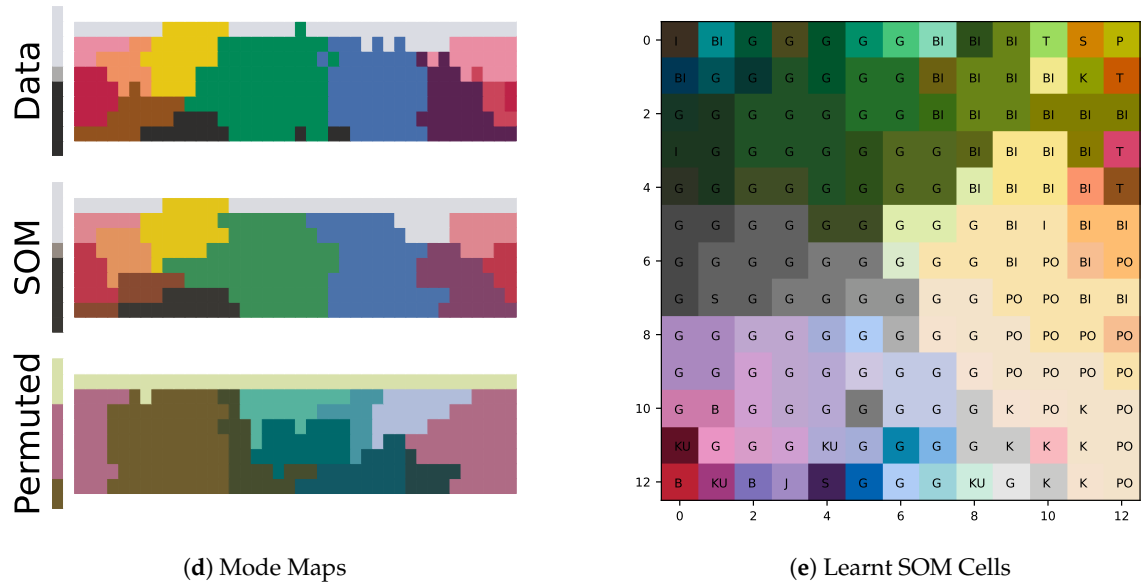

1.107. Yaminahua;  $|\mathcal{W}| = 17$

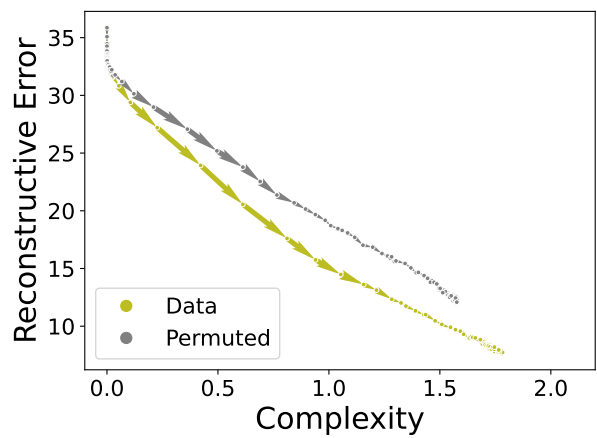

(a) Learning Space

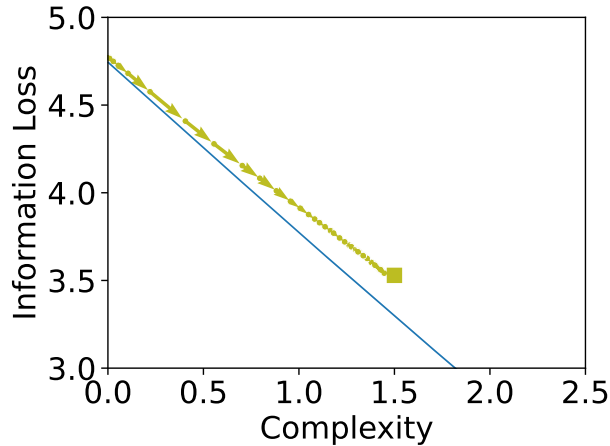

(b) Communicative Space

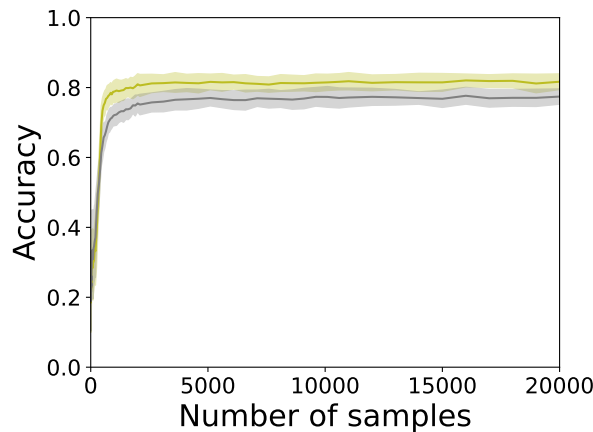

(c) Accuracy

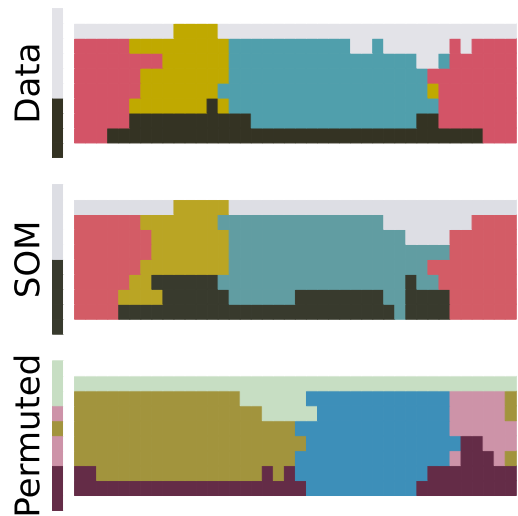

(d) Mode Maps

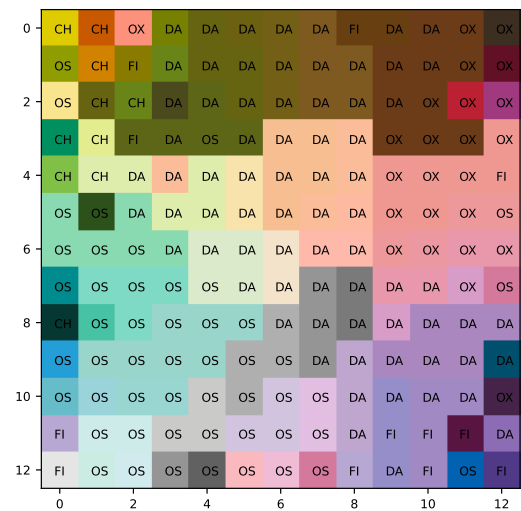

(e) Learnt SOM Cells



1.108. Yucuna;  $|\mathcal{W}| = 9$

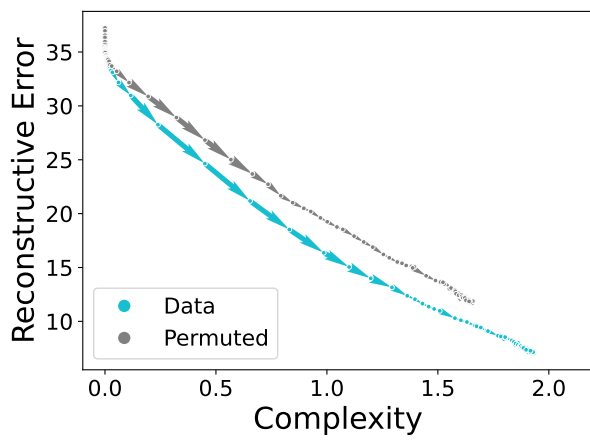

(a) Learning Space

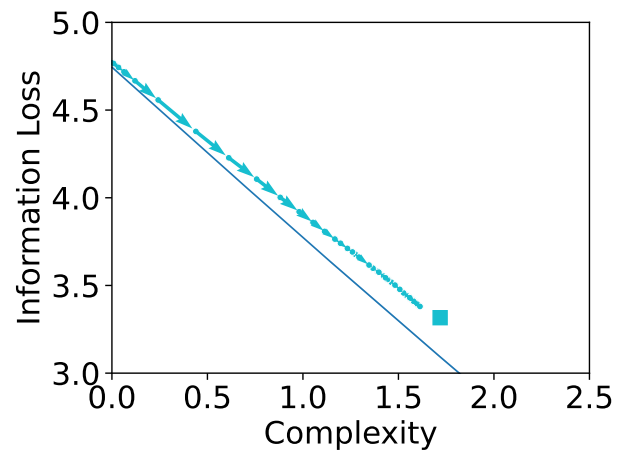

(b) Communicative Space

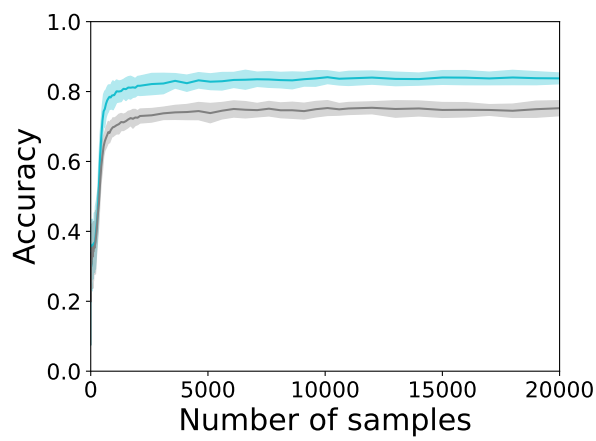

(c) Accuracy

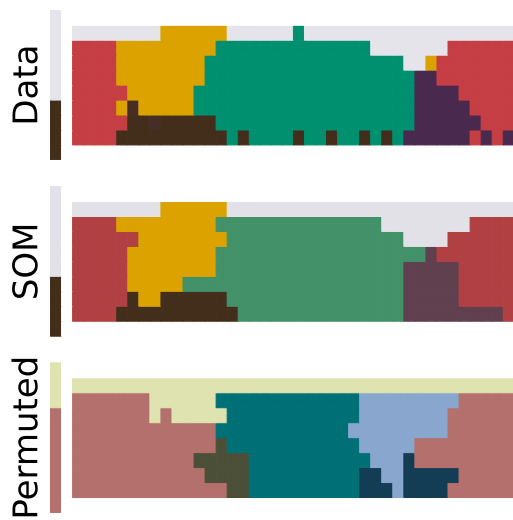

(d) Mode Maps

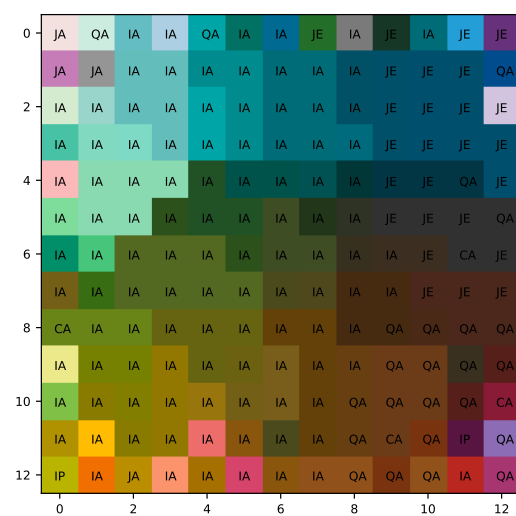

(e) Learnt SOM Cells

1.109. Yupik;  $|\mathcal{W}| = 26$

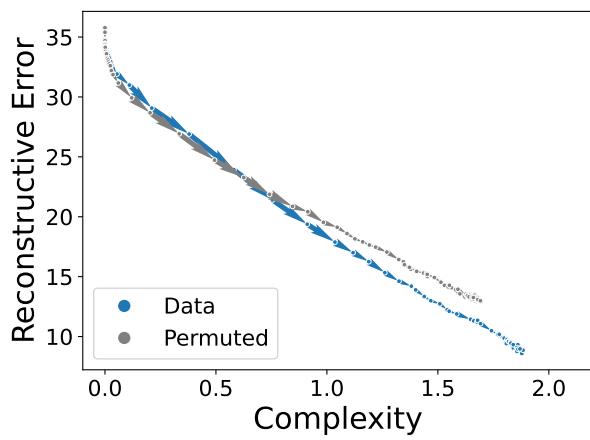

(a) Learning Space

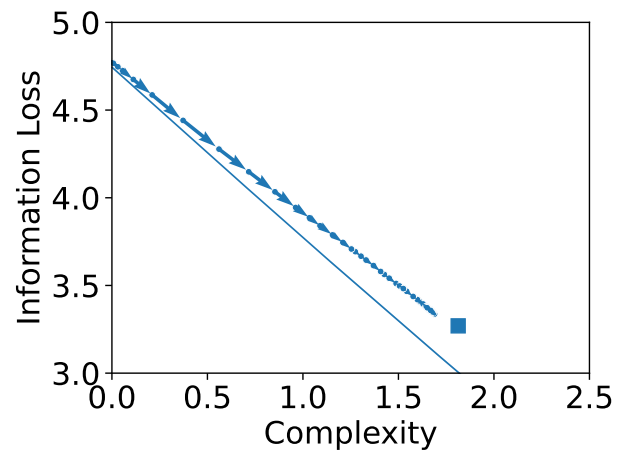

(b) Communicative Space

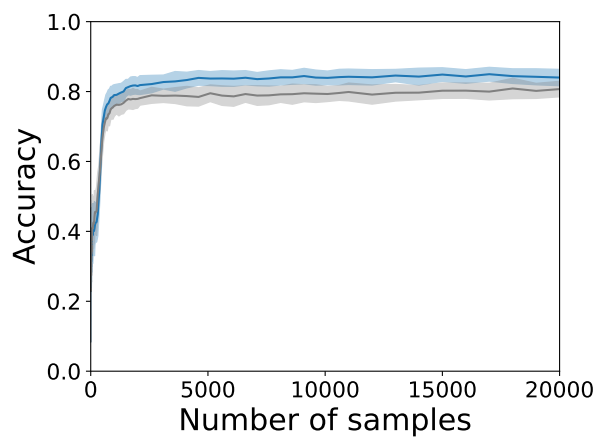

(c) Accuracy

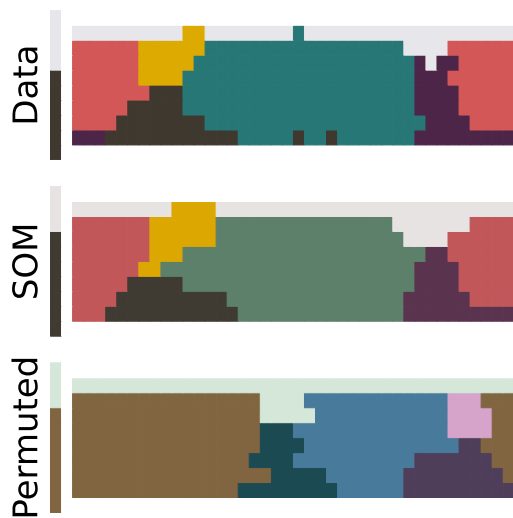

(d) Mode Maps

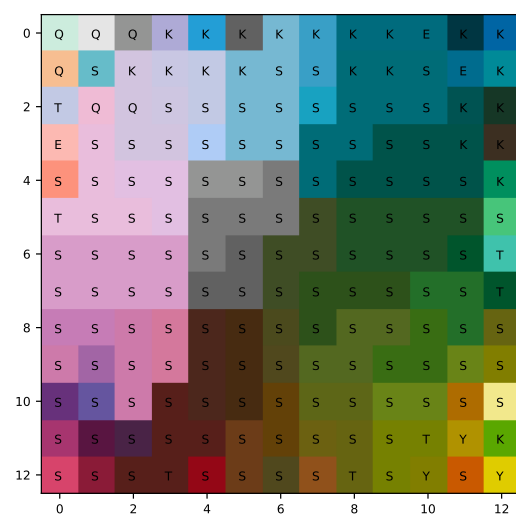

(e) Learnt SOM Cells

1.110. Zapoteco;  $|\mathcal{W}| = 13$

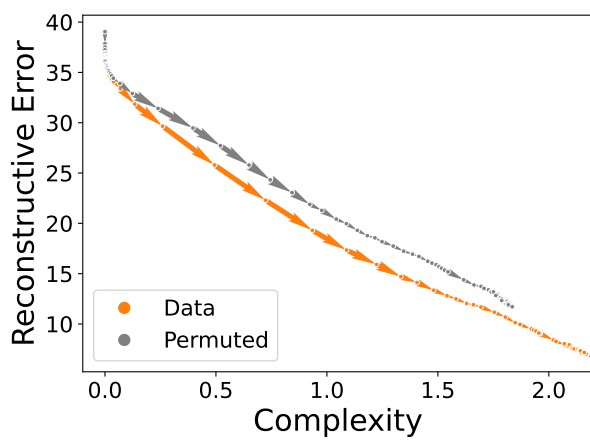

(a) Learning Space

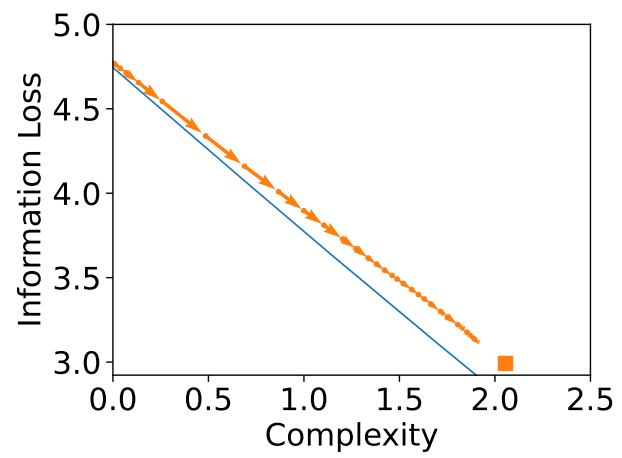

(b) Communicative Space

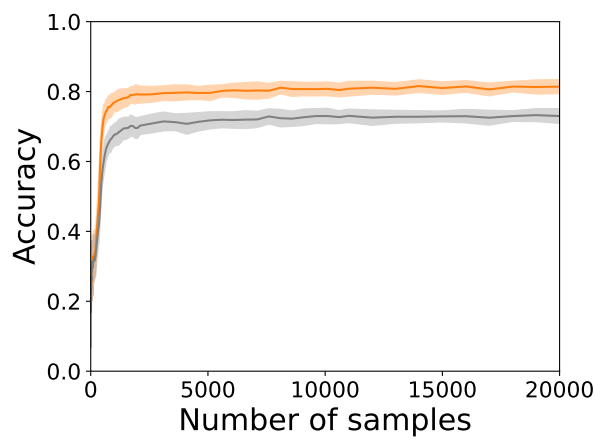

(c) Accuracy

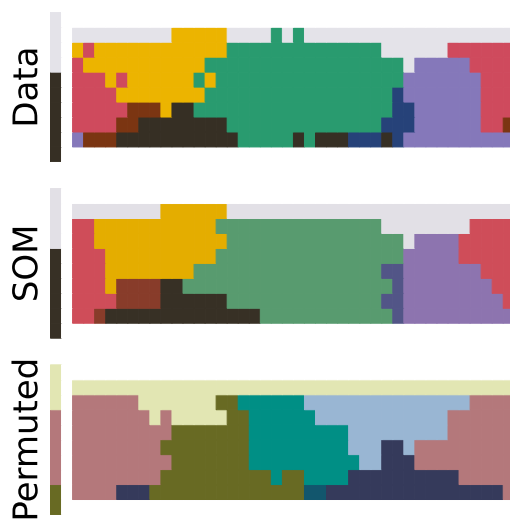

(d) Mode Maps

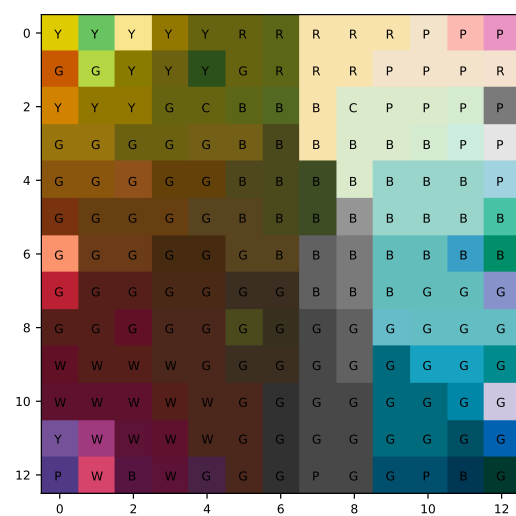

(e) Learnt SOM Cells

## Reference

1. Cook, R.S.; Kay, P.; Regier, T. The world color survey database. In *Handbook of Categorization in Cognitive Science*; Elsevier: Amsterdam, The Netherlands, 2005; pp. 223–241.
